# Supplementary material for: Ciprofloxacin-Tethered 1,2,3-Triazole Conjugates: New Quinolone Family Compounds to Upgrade Our Antiquated Approach against Bacterial Infections
Source: PubMed Central journal article supplement — ACS Omega. 2022 Jan 11;7(3):2725–36. doi: 10.1021/acsomega.1c05303 (PMC8793084; doi:10.1021/acsomega.1c05303), 2022-01-11
Supplement: ao1c05303_si_001.pdf [file ao1c05303_si_001.pdf]

## **Electronic Supporting Information**

### **Ciprofloxacin tethered 1, 2, 3-triazole conjugates: new quinolone family compounds to upgrade our antiquated approach against bacterial infections**

Alka Agarwal<sup>1\*</sup>, Preeti Singh<sup>2</sup>, Anand Maurya<sup>1</sup>, Upendra Kumar Patel<sup>1</sup>, Alka Singh<sup>1</sup>, Gopal Nath<sup>3</sup>

1. Department of Medicinal Chemistry, Institute of Medical Sciences, Banaras Hindu University, Varanasi, UP-221005, India.
2. Chemical Biology Laboratory, University of Delhi, Delhi-110007
3. Department of Microbiology, Institute of Medical Sciences, Banaras Hindu University, Varanasi, UP-221005, India.

#### **\*Corresponding Author**

Prof. Alka Agarwal

Department of Medicinal Chemistry

Institute of Medical Sciences

Banaras Hindu University

Varanasi, 221005, U.P. India

Email: [agarwal.dralka@gmail.com](mailto:agarwal.dralka@gmail.com)

<sup>1</sup>H NMR (400MHz, CDCl<sub>3</sub>) (2):

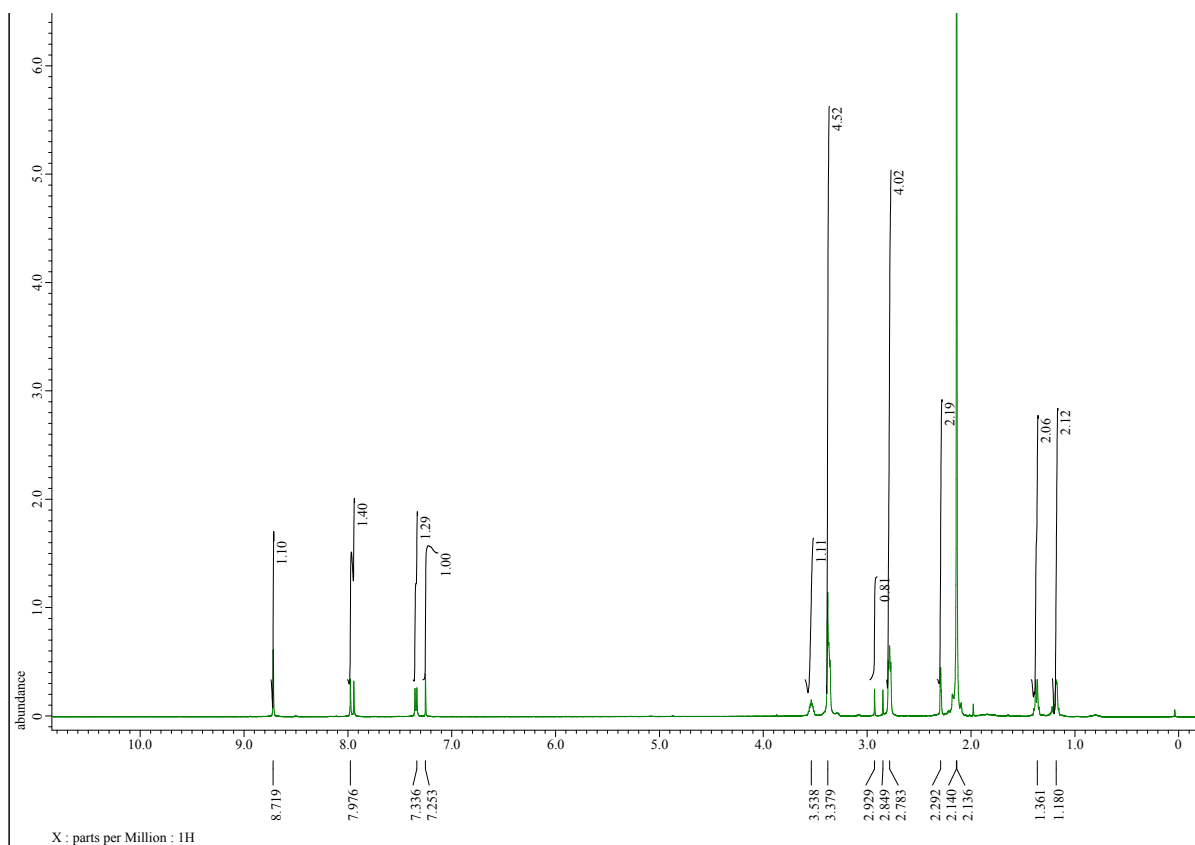

<sup>13</sup>C NMR (100MHz, CDCl<sub>3</sub>) (2):

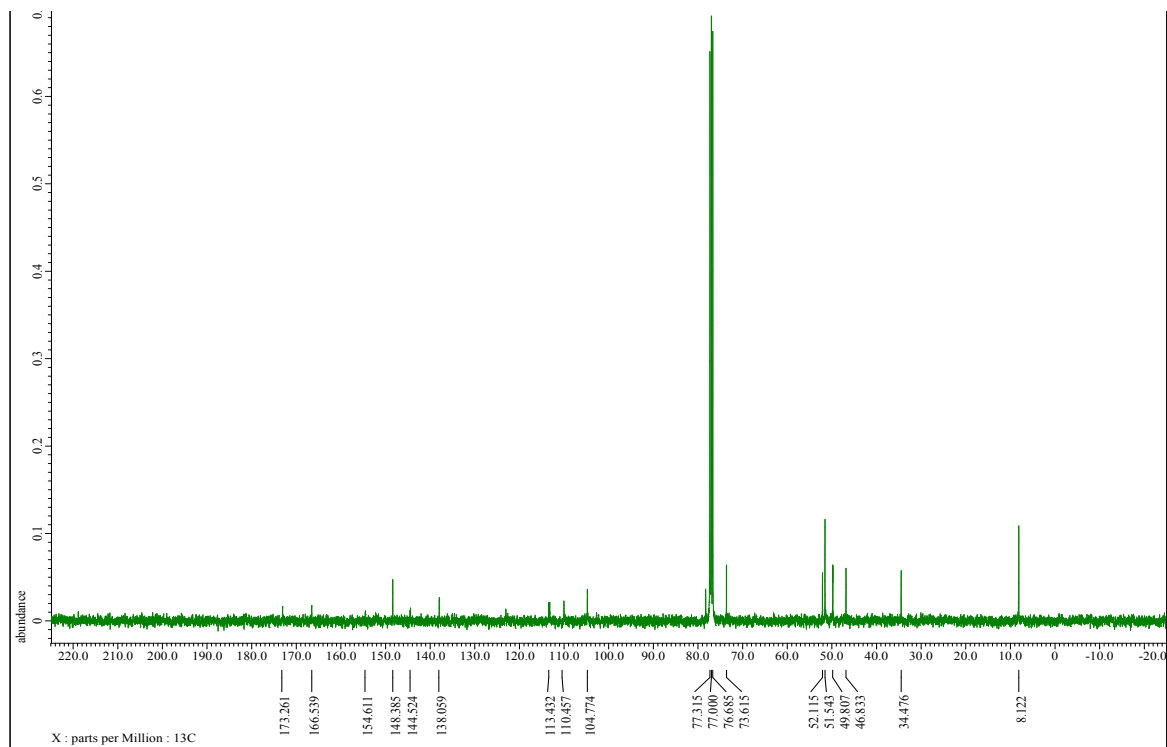

### Qualitative Compound Report

Data File: RK-200.d  
 Sample Type: Sample  
 Instrument Name: Instrument 1  
 Acq Method: Demo JK.m  
 IRM Calibration Status: Success  
 Comment:

Sample Name: RK-200  
 Position: P1-C1  
 User Name:  
 Acquired Time: 25-06-2018 15:05:30  
 DA Method: Default.m

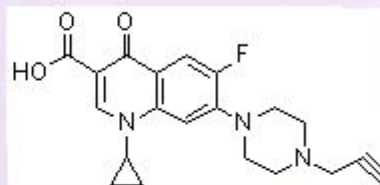

Sample Group: Info.  
 Acquisition SW: 6200 series TOF/ESI series  
 Version: Q-ToF B.05.01 (85125.1)

Compound Table

| Compound Label         | RT    | Mass   | Formula         | MFG Formula     | MFG Diff (ppm) | DB Formula      |
|------------------------|-------|--------|-----------------|-----------------|----------------|-----------------|
| Cpd 3: C20 H20 F N3 O3 | 0.091 | 369.15 | C20 H20 F N3 O3 | C20 H20 F N3 O3 | -3.01          | C20 H20 F N3 O3 |

| Compound Label         | m/z      | RT    | Algorithm                 | Mass   |
|------------------------|----------|-------|---------------------------|--------|
| Cpd 3: C20 H20 F N3 O3 | 370.1579 | 0.091 | Find by Molecular Feature | 369.15 |

M/E MS Spectrum

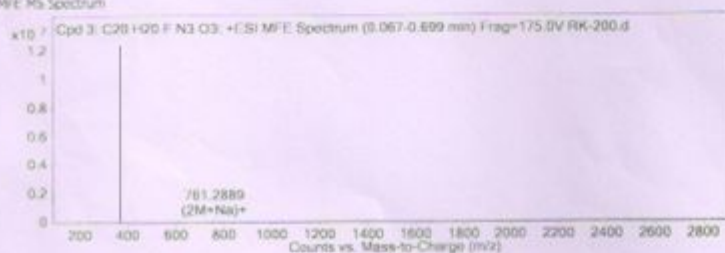

M/E MS Zoomed Spectrum

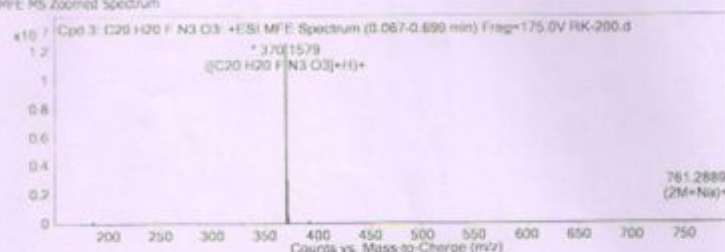

MS Spectrum Peak List

| m/z      | z | Abund      | Formula         | Ion      |
|----------|---|------------|-----------------|----------|
| 185.5836 | 2 | 45616.8    | C20 H20 F N3 O3 | (M+2H)+2 |
| 370.1579 | 1 | 125851.35  | C20 H20 F N3 O3 | (M+H)+   |
| 371.1612 | 1 | 2888603.59 | C20 H20 F N3 O3 | (M+H)+   |
| 372.1639 | 1 | 292711.98  | C20 H20 F N3 O3 | (M+H)+   |
| 373.1662 | 1 | 45749      | C20 H20 F N3 O3 | (M+H)+   |
| 392.1397 | 1 | 63646.3    | C20 H20 F N3 O3 | (M+Na)+  |
| 729.3061 | 1 | 42064.08   | C20 H20 F N3 O3 | (2M+H)+  |
| 761.2889 | 1 | 179355.22  |                 | (2M+Na)+ |
| 762.2922 | 1 | 81797.65   |                 | (2M+Na)+ |
| 763.2953 | 1 | 21199.33   |                 | (2M+Na)+ |

— End Of Report. —

$^1\text{H}$ NMR (400MHz,  $\text{CDCl}_3$ ) (3a):

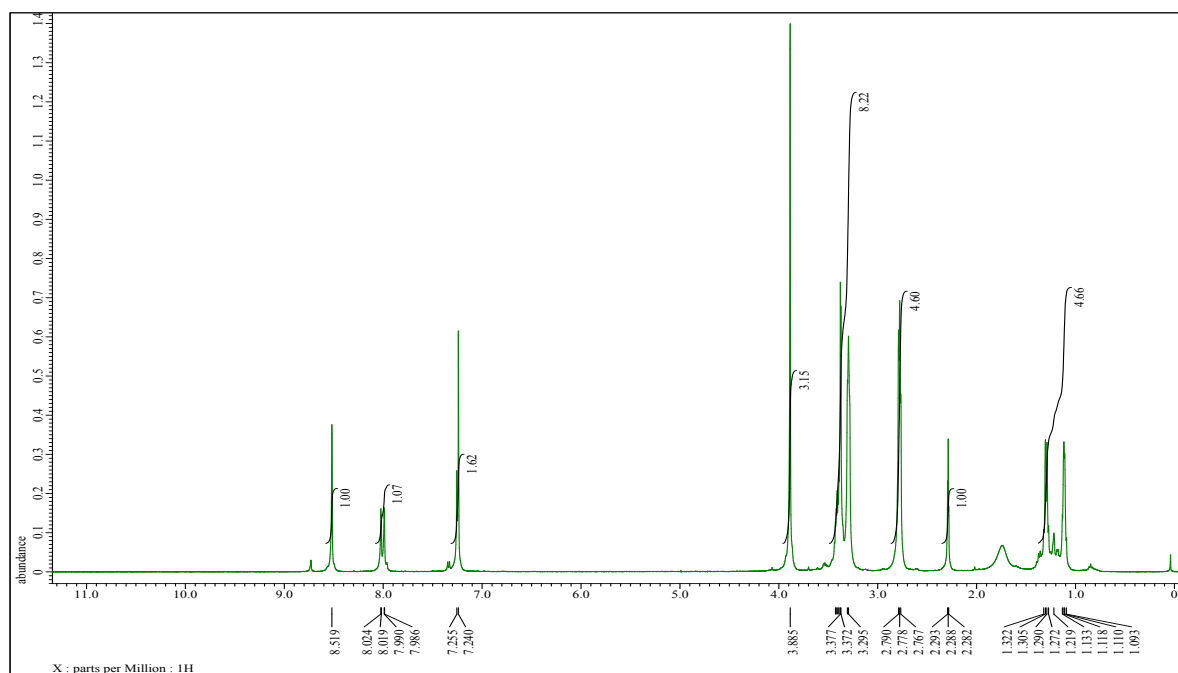

$^{13}\text{C}$ NMR (100MHz,  $\text{CDCl}_3$ ) (3a):

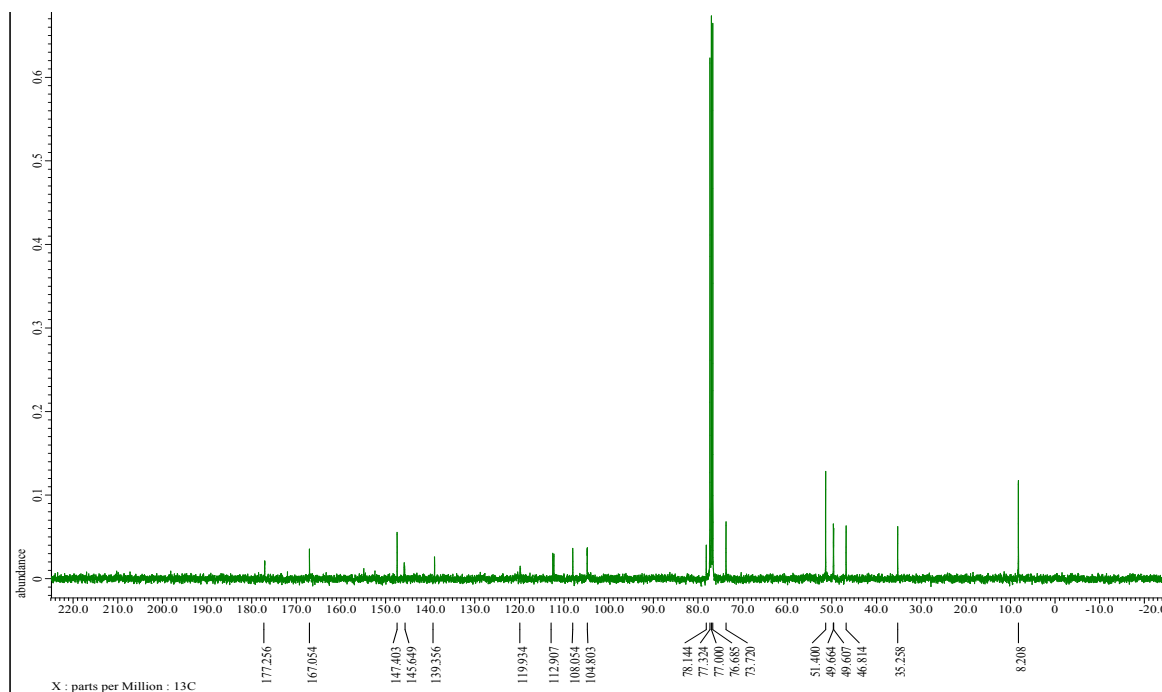

### Qualitative Compound Report

Data File: RK-201.d  
 Sample: Sample  
 Instrument Name: Instrument 1  
 Acq Method: Data\_KL.M  
 IRM Calibration Status: Success  
 Comment:

Sample Name: RK-201  
 Position: P1-C2  
 User Name:  
 Acquired Time: 25-06-2018 15:07:12  
 DA Method: Default.m

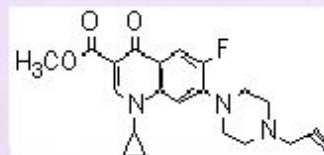

Sample Group: Info.  
 Acquisition SW: 6700 series TOF/6500 series  
 Version: Q-TOF 8.05.01 (RS175.1)

Compound Table

| Compound Label         | RT    | Mass     | Formula         | MFG Formula     | MFG Diff (ppm) | DB Formula      |
|------------------------|-------|----------|-----------------|-----------------|----------------|-----------------|
| Cpd 2: C21 H22 F N3 O3 | 0.097 | 383.1666 | C21 H22 F N3 O3 | C21 H22 F N3 O3 | -5.5           | C21 H22 F N3 O3 |

| Compound Label         | m/z      | RT    | Algorithm                 | Mass     |
|------------------------|----------|-------|---------------------------|----------|
| Cpd 2: C21 H22 F N3 O3 | 384.1736 | 0.097 | Find by Molecular Feature | 383.1666 |

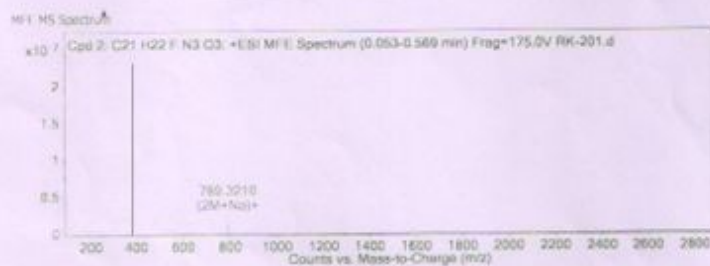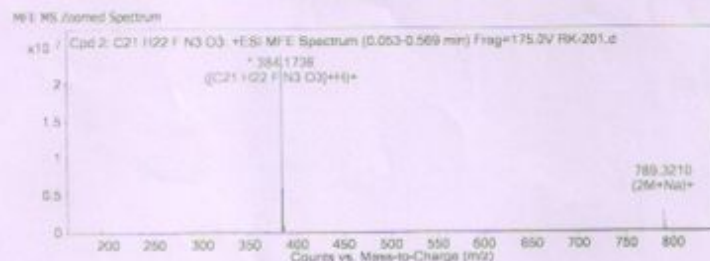

MS Spectrum Peak List

| m/z      | z | Abund      | Formula         | Ion      |
|----------|---|------------|-----------------|----------|
| 150.1006 | 2 | 384309.69  | C21 H22 F N3 O3 | (M+2H)+2 |
| 193.0921 | 2 | 90383.72   | C21 H22 F N3 O3 | (M+2H)+2 |
| 384.1736 | 1 | 23774990   | C21 H22 F N3 O3 | (M+H)+   |
| 385.177  | 1 | 5704907.21 | C21 H22 F N3 O3 | (M+H)+   |
| 386.1799 | 1 | 756516.05  | C21 H22 F N3 O3 | (M+H)+   |
| 387.1821 | 1 | 75991.80   | C21 H22 F N3 O3 | (M+H)+   |
| 769.321  | 1 | 2659324.25 |                 | (2M+Na)+ |
| 790.3243 | 1 | 1282811.96 |                 | (2M+Na)+ |
| 791.3268 | 1 | 330750.84  |                 | (2M+Na)+ |
| 792.3292 | 1 | 60788.15   |                 | (2M+Na)+ |

-- End Of Report --

$^1\text{H}$ NMR (400MHz,  $\text{CDCl}_3$ ) (3b):

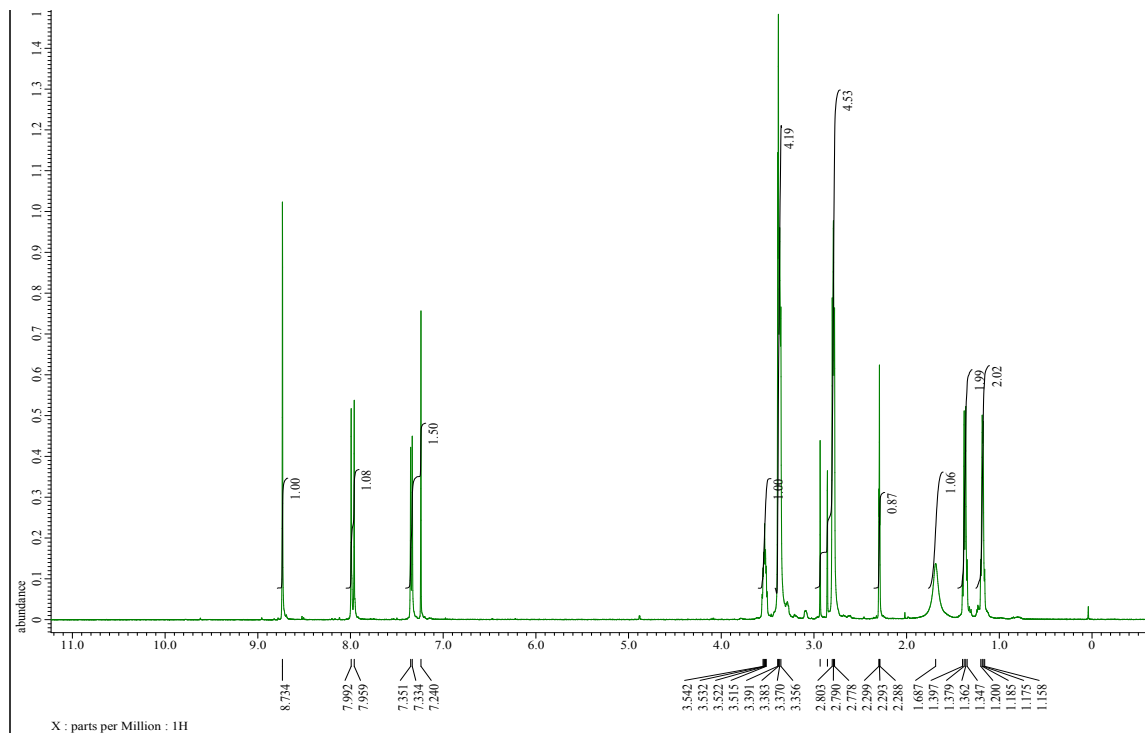

$^{13}\text{C}$ NMR (100MHz,  $\text{CDCl}_3$ ) (3b):

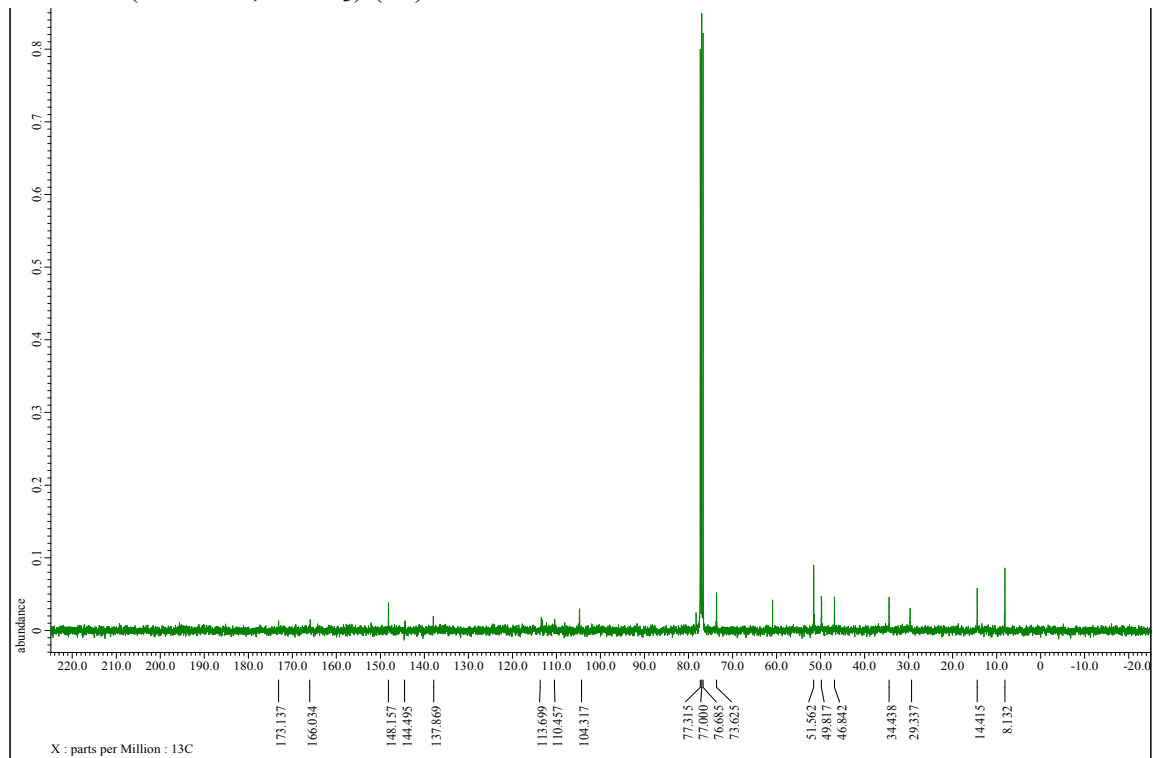

### Qualitative Compound Report

Data File: RK-202.d  
 Sample Type: Sample  
 Instrument Name: Instrument 1  
 Acq Method: Demo\_K.M  
 IRM Calibration Status: Success  
 Comment:

Sample Name: RK-202  
 Position: P1-06  
 User Name:  
 Acquired Time: 28-06-2018 14:41:44  
 DA Method: Default.m

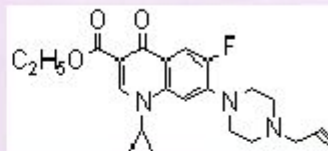

Sample Group: Info.  
 Acquisition SW: 6500 series TOF/6500 series  
 Version: Q-TOF 8.05.01 (85125.1)

**Compound Table**

| Compound Label         | RT    | Mass     | Formula         | MFG Formula     | MFG Diff (ppm) | *DB Formula     |
|------------------------|-------|----------|-----------------|-----------------|----------------|-----------------|
| Cpd 1: C22 H24 F N3 O3 | 0.092 | 397.1785 | C22 H24 F N3 O3 | C22 H24 F N3 O3 | 4.25           | C22 H24 F N3 O3 |

| Compound Label         | m/z      | RT    | Algorithm                 | Mass     |
|------------------------|----------|-------|---------------------------|----------|
| Cpd 1: C22 H24 F N3 O3 | 398.1857 | 0.092 | Find by Molecular Feature | 397.1785 |

**MFE MS Spectrum**

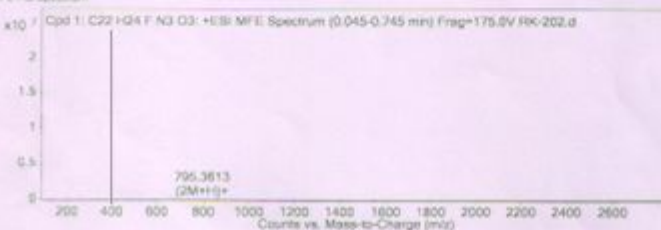

**MFE MS Zoomed Spectrum**

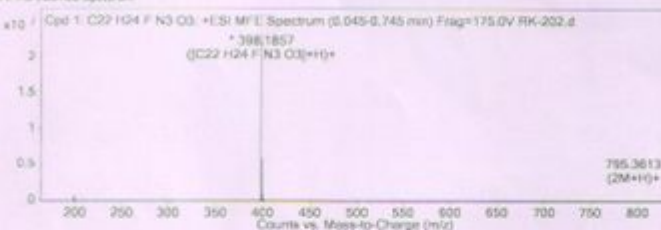

**MS Spectrum Peak List**

| m/z      | z | Abund      | Formula         | Ion      |
|----------|---|------------|-----------------|----------|
| 199.5954 | 2 | 468728.25  | C22 H24 F N3 O3 | (M+2H)+2 |
| 200.9969 | 2 | 121913.5   | C22 H24 F N3 O3 | (M+2H)+2 |
| 200.9983 | 2 | 19372.27   | C22 H24 F N3 O3 | (M+2H)+2 |
| 398.1857 | 1 | 2334828    | C22 H24 F N3 O3 | (M+H)+   |
| 398.1889 | 1 | 5841546.73 | C22 H24 F N3 O3 | (M+H)+   |
| 400.1919 | 1 | 85147.43   | C22 H24 F N3 O3 | (M+H)+   |
| 401.1946 | 1 | 103297.76  | C22 H24 F N3 O3 | (M+H)+   |
| 417.1595 | 2 | 35592.49   |                 | (2M+H)+2 |
| 417.6604 | 2 | 17827.01   |                 | (2M+H)+2 |
| 418.171  | 2 | 14246.19   |                 | (2M+H)+2 |

--- End Of Report ---

$^1\text{H}$ NMR (400MHz,  $\text{CDCl}_3$ ) (3c):

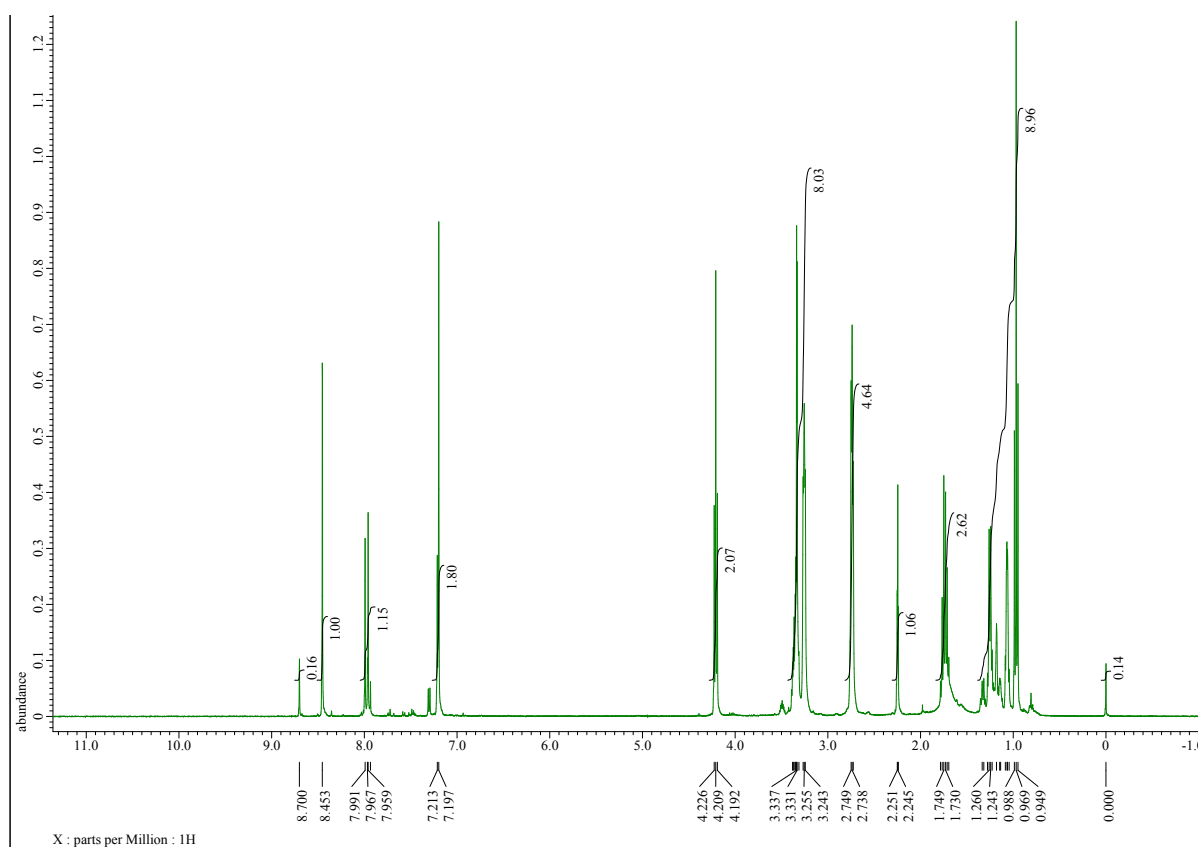

$^{13}\text{C}$ NMR (100MHz,  $\text{CDCl}_3$ ) (3c):

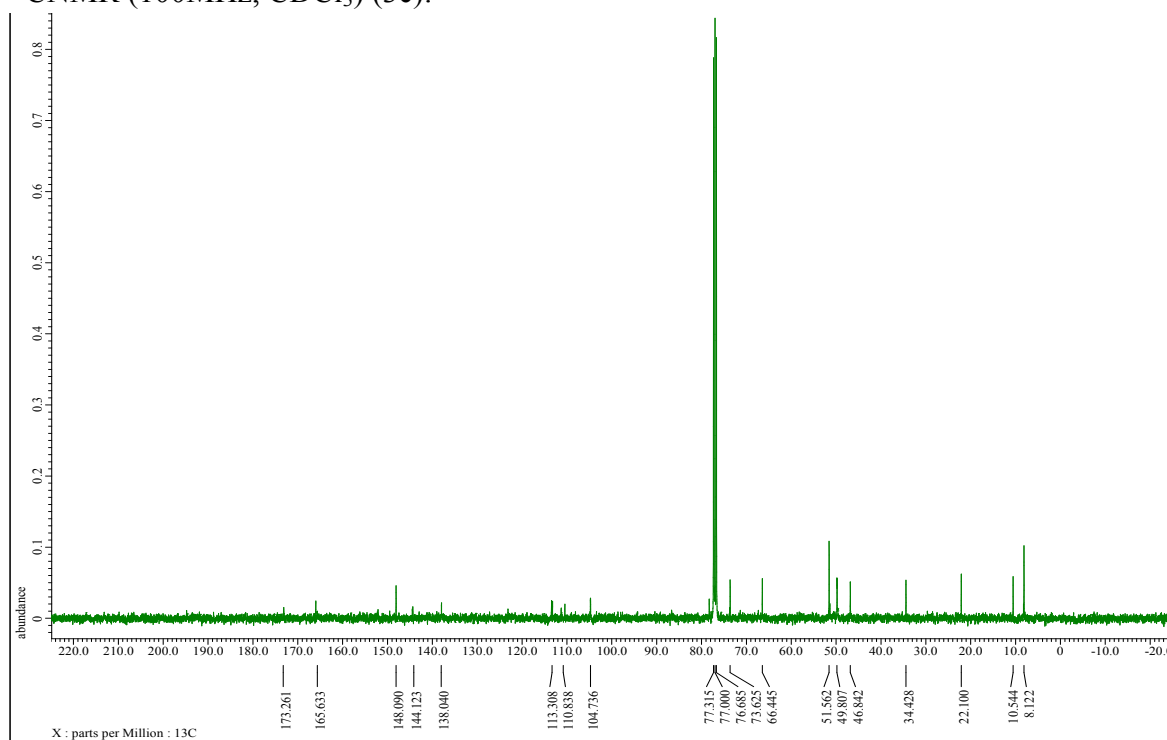



### Qualitative Compound Report

**Data File** RK-203.d **Sample Name** RK-203  
**Sample Type** Sample **Position** P1-B1  
**Instrument Name** Instrument 1 **User Name**  
**Acq Method** Data: 1K.m **Acquired Time** 04-07-2018 13:03:35  
**IRM Calibration Status** Success **DA Method** Default.m  
**Comment**

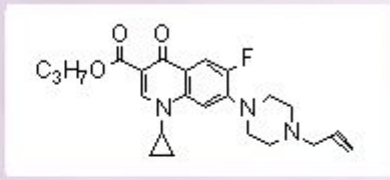

**Sample Group** Info.  
**Acquisition SW** 6200 series TOF/MS00 series  
**Version** Q-TOF 8.05.01 (06125.1)

**Compound Table**

| Compound Label          | RT    | Mass     | Formula         | MFG Formula     | MFG DIF (ppm) | DB Formula      |
|-------------------------|-------|----------|-----------------|-----------------|---------------|-----------------|
| Comp 2: C23 H26 F N3 O3 | 0.108 | 411.1965 | C23 H26 F N3 O3 | C23 H26 F N3 O3 | -1.7          | C23 H26 F N3 O3 |

| Compound Label          | m/z      | RT    | Algorithm                 | Mass     |
|-------------------------|----------|-------|---------------------------|----------|
| Comp 2: C23 H26 F N3 O3 | 412.2041 | 0.108 | Find by Molecular Feature | 411.1965 |

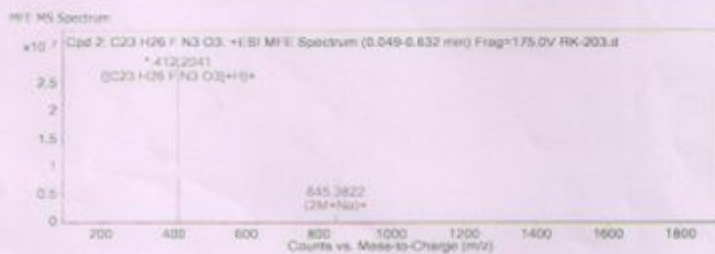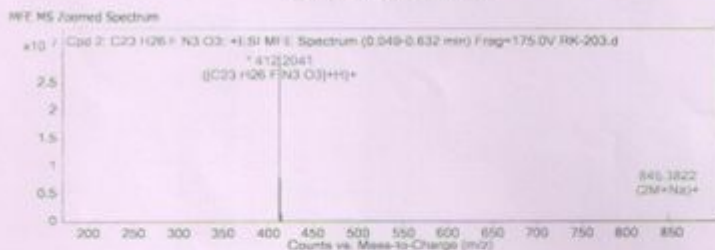

**MS Spectrum Peak List**

| m/z      | z | Abund      | Formula         | Ion      |
|----------|---|------------|-----------------|----------|
| 206.6036 | 2 | 257996.24  | C23 H26 F N3 O3 | (M+2H)+2 |
| 207.1071 | 2 | 74624.24   | C23 H26 F N3 O3 | (M+2H)+2 |
| 412.2041 | 1 | 301997.76  | C23 H26 F N3 O3 | (M+H)+   |
| 413.2073 | 1 | 809385.26  | C23 H26 F N3 O3 | (M+H)+   |
| 414.2103 | 1 | 1192013.53 | C23 H26 F N3 O3 | (M+H)+   |
| 415.2132 | 1 | 140738.56  | C23 H26 F N3 O3 | (M+H)+   |
| 845.3822 | 1 | 1443680    |                 | (2M+Na)+ |
| 846.3853 | 1 | 771259.46  |                 | (2M+Na)+ |
| 847.3877 | 1 | 208680.85  |                 | (2M+Na)+ |
| 848.3901 | 1 | 40520.99   |                 | (2M+Na)+ |

— End Of Report —

$^1\text{H}$ NMR (400MHz,  $\text{CDCl}_3$ ) (4a):

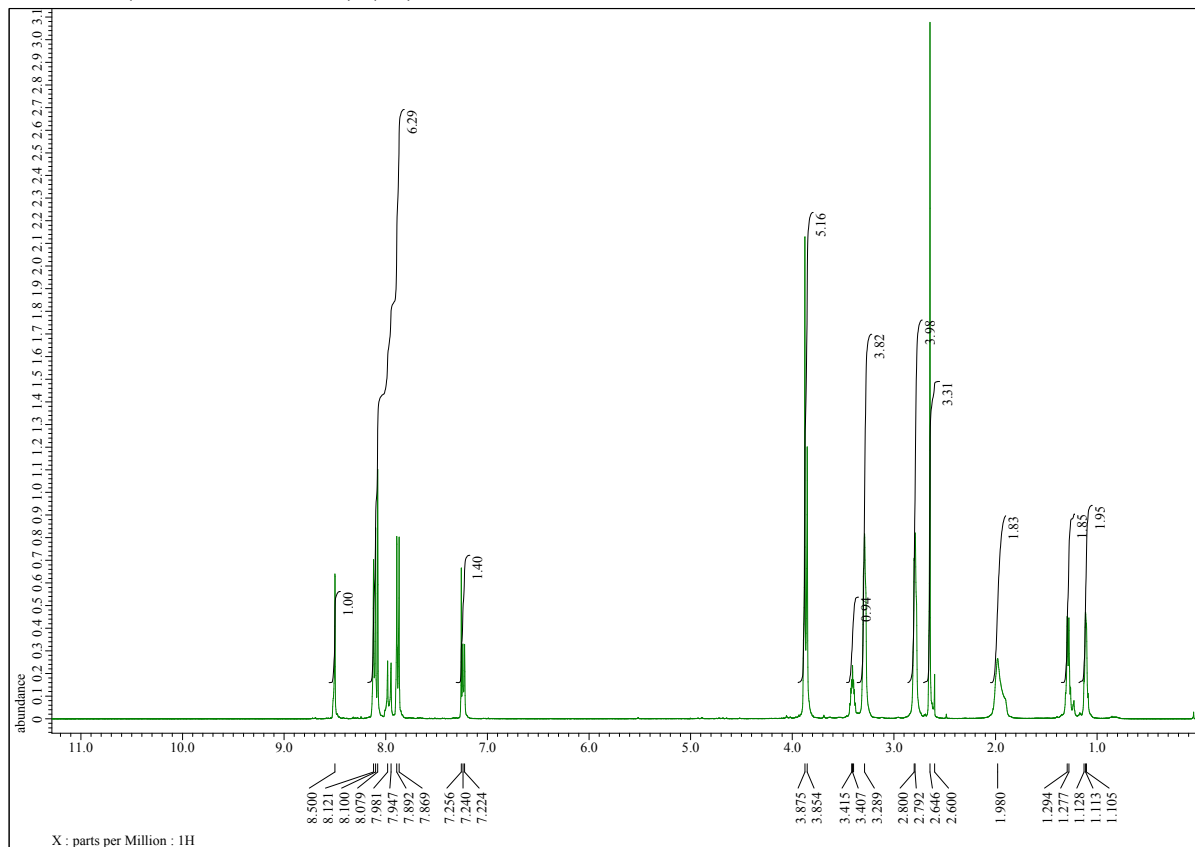

$^{13}\text{C}$ NMR (100MHz,  $\text{CDCl}_3$ ) (4a):

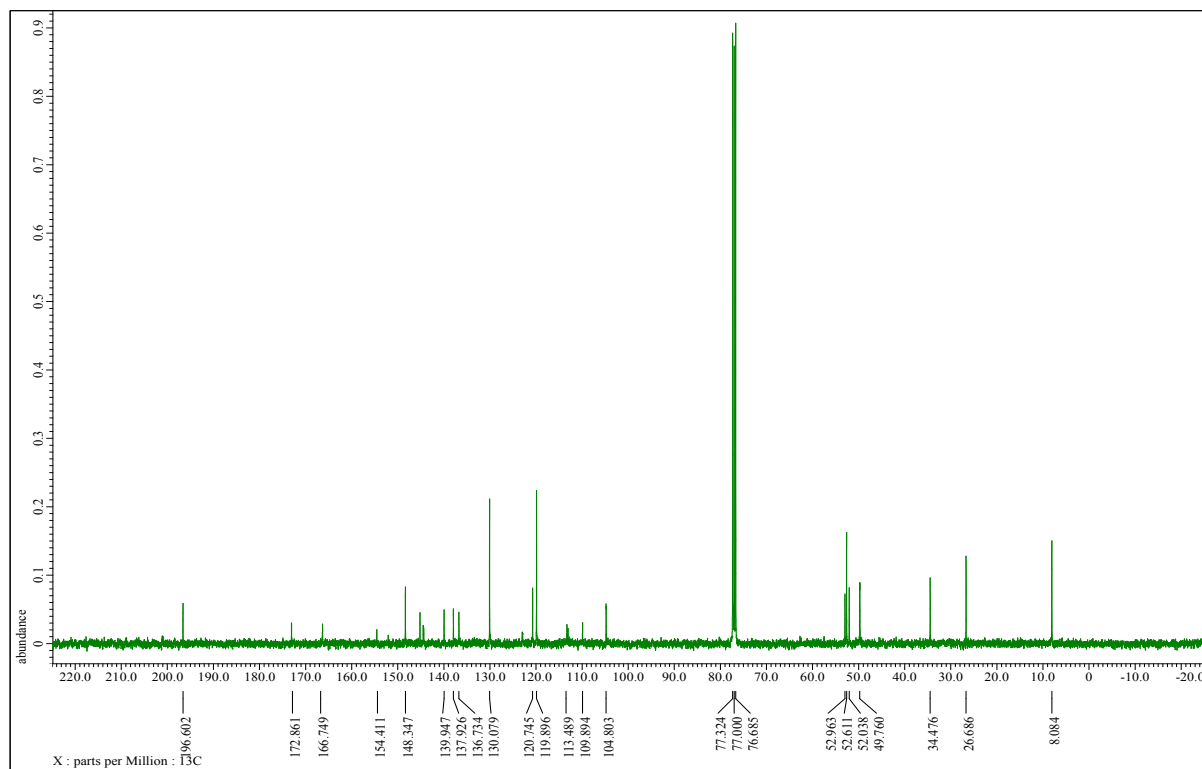

### Qualitative Compound Report

Data File: RK-205.d  
 Sample Type: Sample  
 Instrument Name: Instrument 1  
 Acq Method: Demo JK.m  
 IRM Calibration Status: Success  
 Comment:

Sample Name: RK-205  
 Position: P1-04  
 User Name:  
 Acquired Time: 02-07-2018 15:46:00  
 DA Method: Default.m

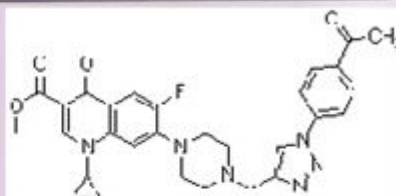

Sample Group: Info.  
 Acquisition SW: 5200 series TOF/MSD series  
 Version: Q-TOF 8.05.01 (86125.1)

**Compound Table**

| Compound Label         | RT    | Mass     | Formula         | MFG Formula     | MFG Diff (ppm) | DB Formula        |
|------------------------|-------|----------|-----------------|-----------------|----------------|-------------------|
| Cpd 3: C29 H29 F N6 O4 | 0.094 | 544.2226 | C29 H29 F N6 O4 | C29 H29 F N6 O4 | 1.48           | - C29 H29 F N6 O4 |

| Compound Label         | m/z      | RT    | Algorithm                 | Mass     |
|------------------------|----------|-------|---------------------------|----------|
| Cpd 3: C29 H29 F N6 O4 | 545.2302 | 0.094 | Find by Molecular Feature | 544.2226 |

**MS Spectrum**

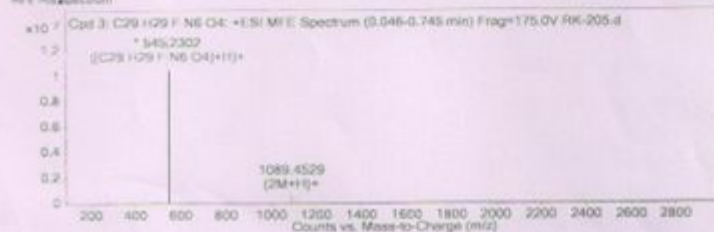

**MFE MS Zoomed Spectrum**

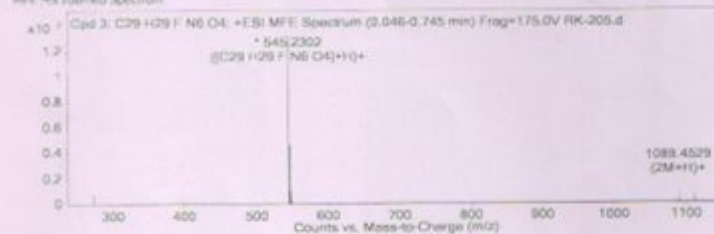

**MS Spectrum Peak List**

| m/z       | z | Abund      | Formula         | Ion      |
|-----------|---|------------|-----------------|----------|
| 273.1186  | 2 | 751706.44  | C29 H29 F N6 O4 | (M+2H)+2 |
| 273.62    | 2 | 256403.25  | C29 H29 F N6 O4 | (M+2H)+2 |
| 545.2302  | 1 | 13157170   | C29 H29 F N6 O4 | (M+H)+   |
| 546.2333  | 1 | 4444756.69 | C29 H29 F N6 O4 | (M+H)+   |
| 547.2280  | 1 | 1096642.81 | C29 H29 F N6 O4 | (M+H)+   |
| 548.2235  | 1 | 210736.84  | C29 H29 F N6 O4 | (M+H)+   |
| 1089.4529 | 1 | 788981.44  |                 | (2M+H)+  |
| 1090.456  | 1 | 524201.06  |                 | (2M+H)+  |
| 1111.4396 | 1 | 616195.13  |                 | (2M+Na)+ |
| 1112.4376 | 1 | 407896.97  |                 | (2M+Na)+ |

— End Of Report —

$^1\text{H}$ NMR (400MHz,  $\text{CDCl}_3$ ) (4b):

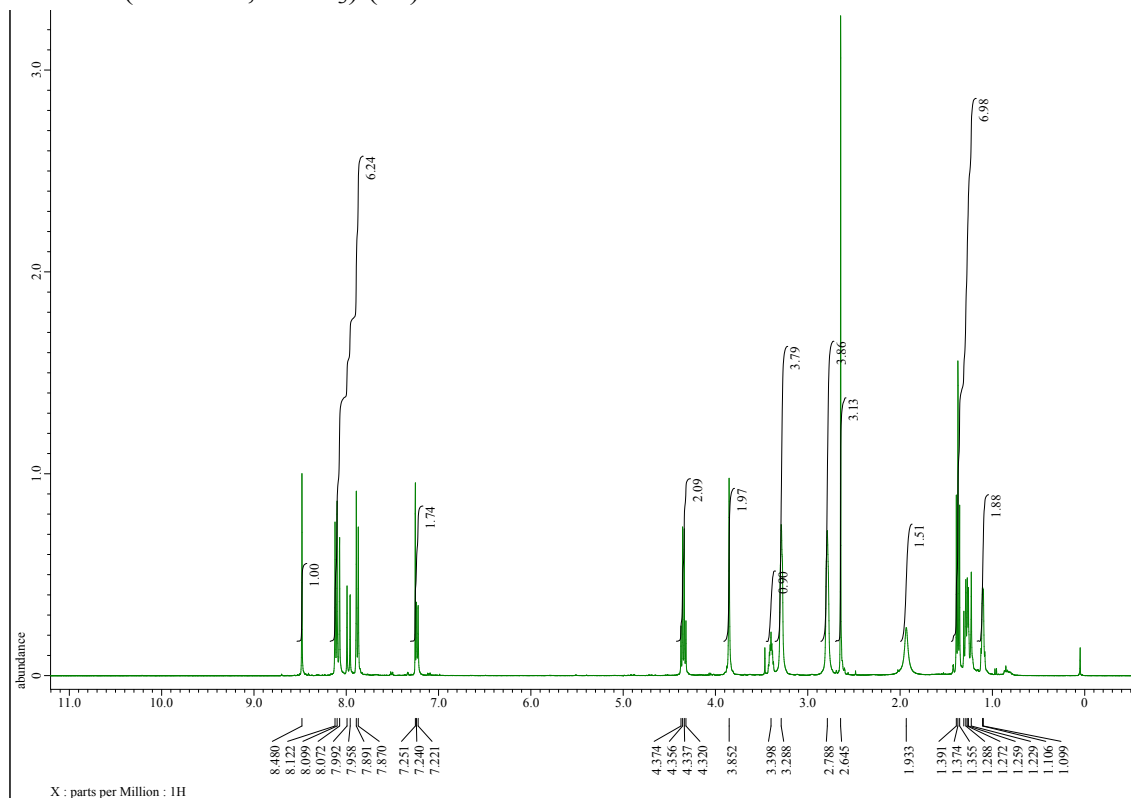

$^{13}\text{C}$ NMR (100MHz,  $\text{CDCl}_3$ ) (4b):

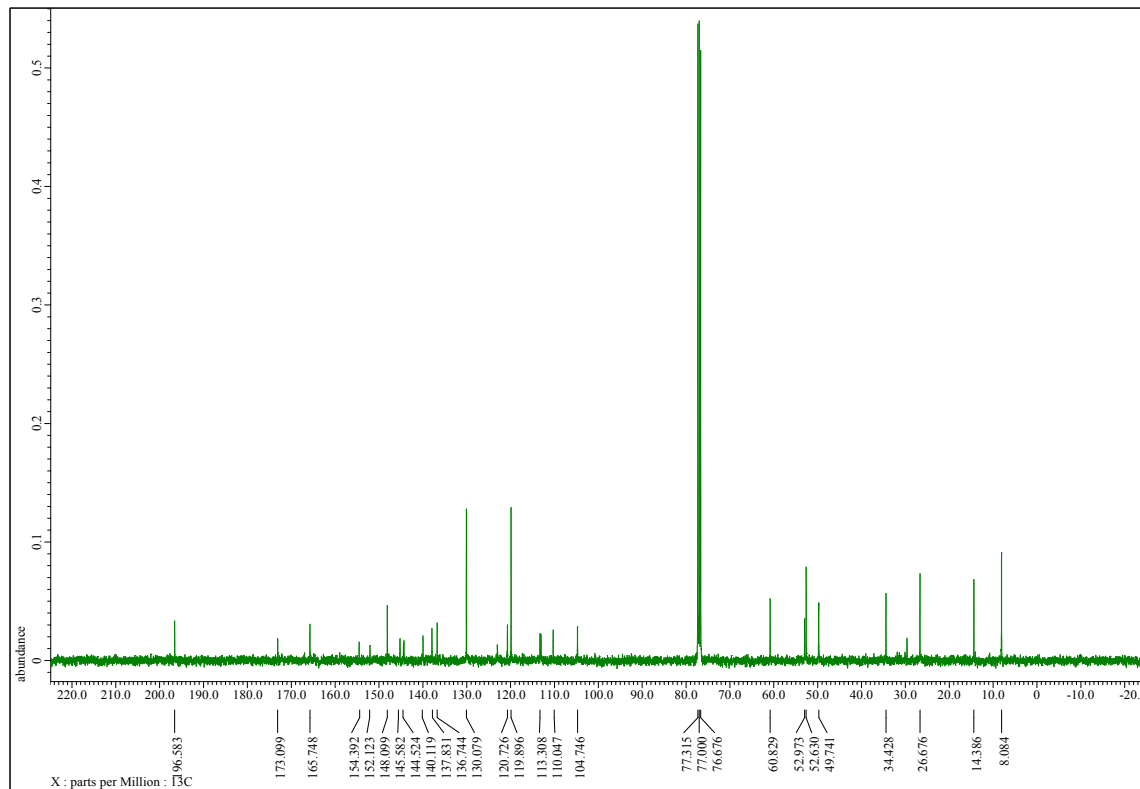

### Qualitative Compound Report

Data File: RK-206.d  
 Sample Type: Sample  
 Instrument Name: Instrument 1  
 Acq Method: Demo\_K.M  
 IRM Calibration Status: Success  
 Comment:  
 Sample Group:  
 Acquisition SW Version: 6200 series TOF/6300 series Q-TOF B.05.01 (05.125.1)

Sample Name:  
 Position:  
 User Name:  
 Acquired:  
 DA Meth:

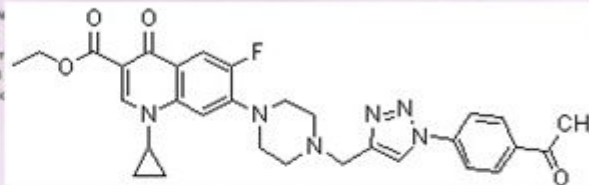

**Compound Table**

| Compound Label         | RT    | Mass     | Formula         | MFG Formula     | MFG Diff (ppm) | DB Formula      |
|------------------------|-------|----------|-----------------|-----------------|----------------|-----------------|
| Cpd 1: C30 H31 F N6 O4 | 0.109 | 558.2383 | C30 H31 F N6 O4 | C30 H31 F N6 O4 | 1.41           | C30 H31 F N6 O4 |

| Compound Label         | m/z      | RT    | Algorithm                 | Mass     |
|------------------------|----------|-------|---------------------------|----------|
| Cpd 1: C30 H31 F N6 O4 | 559.2459 | 0.109 | Find by Molecular Feature | 558.2383 |

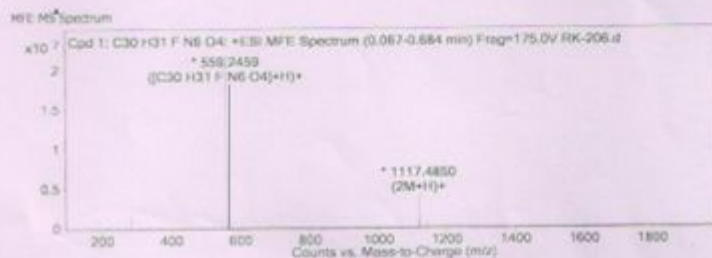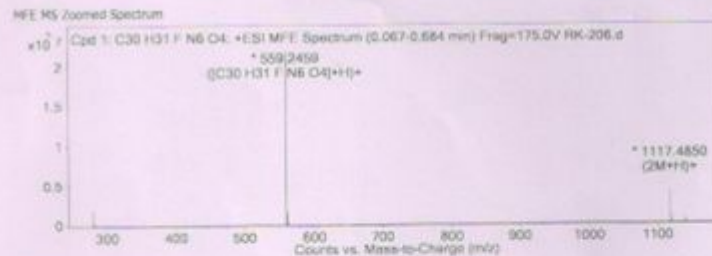

**MS Spectrum Peak List**

| m/z       | z | Abund      | Formula         | Ion      |
|-----------|---|------------|-----------------|----------|
| 280.1264  | 2 | 1843615.38 | C30 H31 F N6 O4 | (M+2H)+2 |
| 280.678   | 2 | 671886.19  | C30 H31 F N6 O4 | (M+2H)+2 |
| 559.2459  | 1 | 21903958   | C30 H31 F N6 O4 | (M+1)+   |
| 560.3492  | 1 | 2634385.99 | C30 H31 F N6 O4 | (M+1)+   |
| 561.3492  | 1 | 5602234.76 | C30 H31 F N6 O4 | (M+1)+   |
| 1117.485  | 1 | 3967168.25 |                 | (2M+1)+  |
| 1118.4886 | 1 | 2801421.02 |                 | (2M+1)+  |
| 1119.4918 | 1 | 1050124.2  |                 | (2M+1)+  |
| 1139.4673 | 1 | 651719.88  |                 | (2M+Na)+ |
| 1140.4701 | 1 | 451261.72  |                 | (2M+Na)+ |

— End Of Report —

$^1\text{H}$ NMR (400MHz,  $\text{CDCl}_3$ ) (4c):

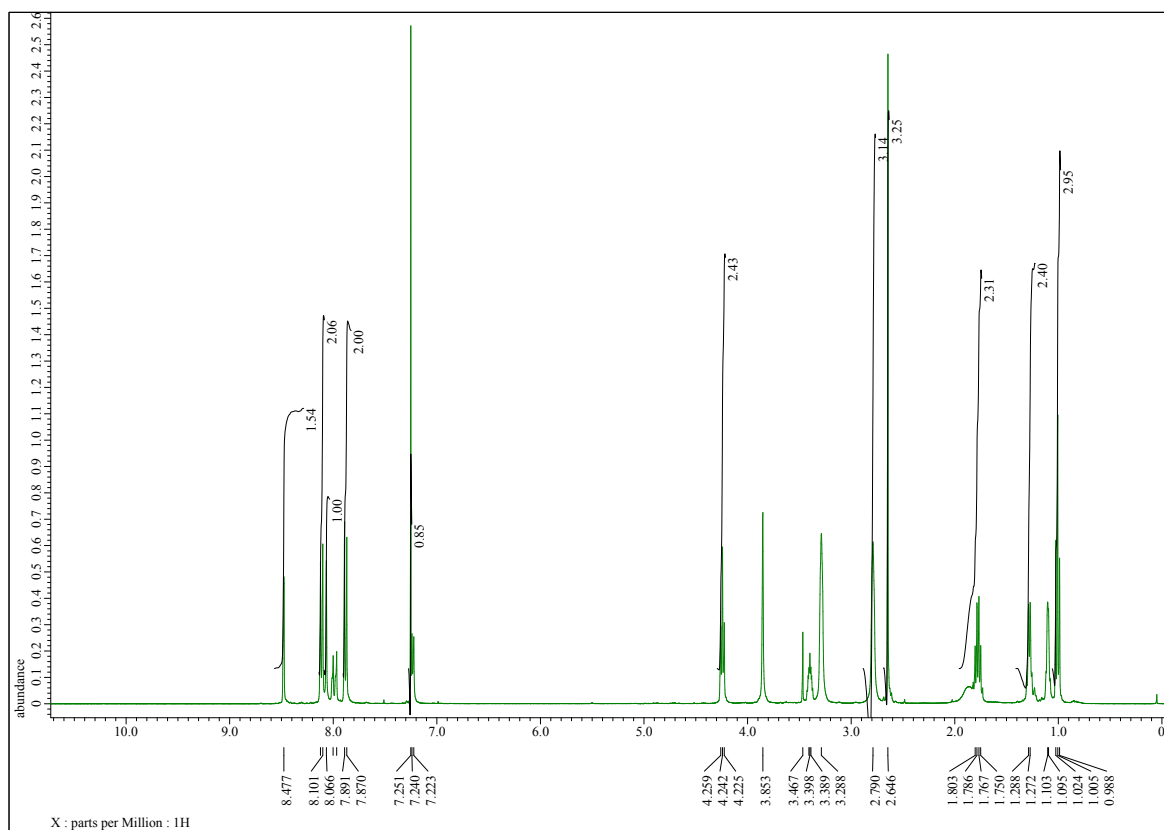

$^{13}\text{C}$ NMR (100MHz,  $\text{CDCl}_3$ ) (4c):

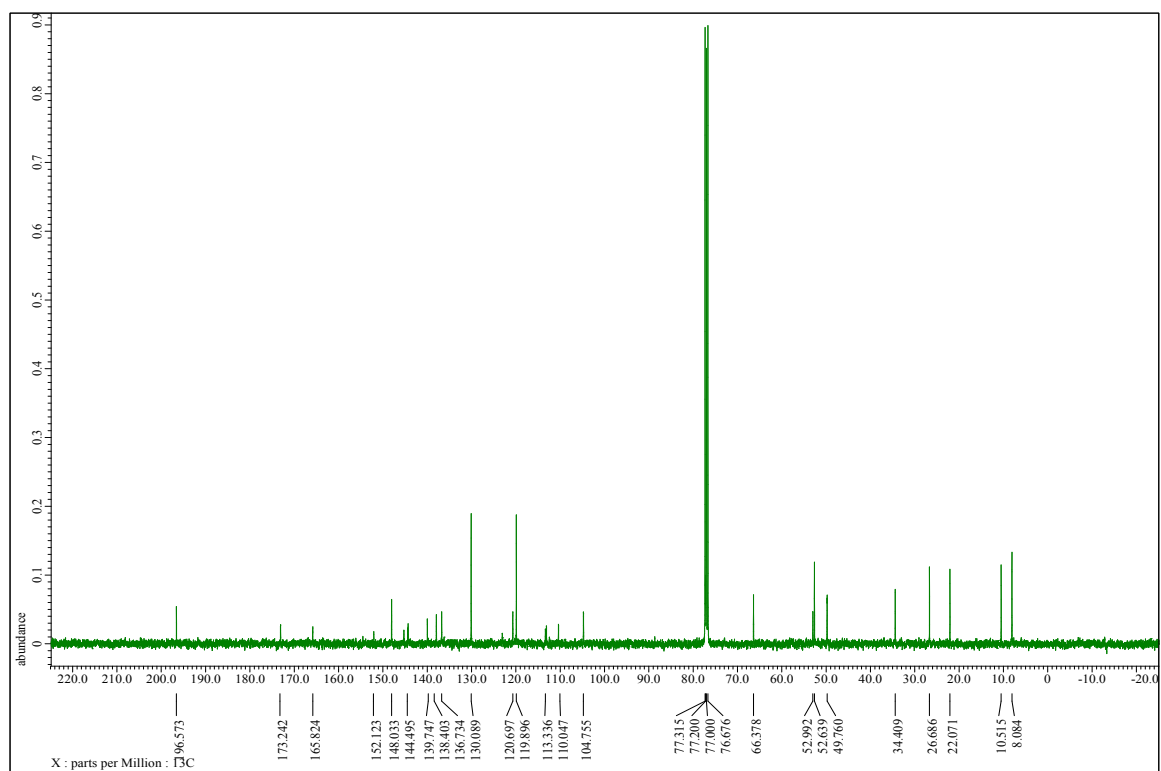

### Qualitative Compound Report

Data File: RK-207.d  
 Sample Type: Sample  
 Instrument Name: Instrument 1  
 Acq Method: Demo JK.m  
 IRM Calibration Status: Success  
 Comment:  
 Sample Group:  
 Acquisition SW: 6200 series TOF/6500 series  
 Version: Q-TOF R.05.01 (09125.1)

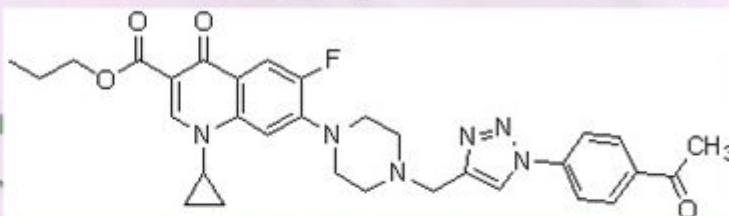

**Compound Table**

| Compound Label         | RT   | Mass     | Formula         | MFG Formula     | MFG Diff (ppm) | DB Formula      |
|------------------------|------|----------|-----------------|-----------------|----------------|-----------------|
| Cpd 3: C31 H33 F N6 O4 | 0.14 | 572.2564 | C31 H33 F N6 O4 | C31 H33 F N6 O4 | -2.87          | C31 H33 F N6 O4 |

| Compound Label         | m/z      | RT   | Algorithm                 | Mass     |
|------------------------|----------|------|---------------------------|----------|
| Cpd 3: C31 H33 F N6 O4 | 573.2643 | 0.14 | Find by Molecular Feature | 572.2564 |

**MFE MS Spectrum**

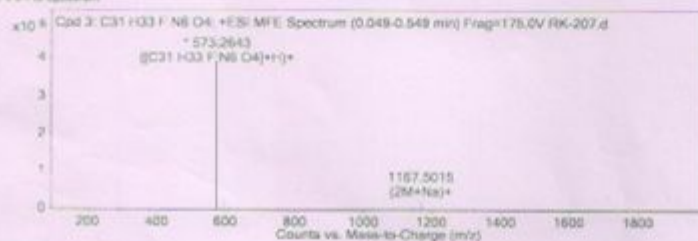

**MFE MS Zoomed Spectrum**

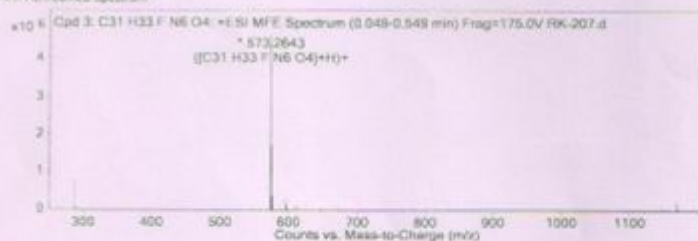

**MS Spectrum Peak List**

| m/z       | z | Abund      | Formula         | Ion                  |
|-----------|---|------------|-----------------|----------------------|
| 287.1367  | 2 | 778921.25  | C31 H33 F N6 O4 | (M+2H) <sup>2+</sup> |
| 287.6376  | 2 | 289348.32  | C31 H33 F N6 O4 | (M+2H) <sup>2+</sup> |
| 573.2643  | 1 | 4604809    | C31 H33 F N6 O4 | (M+H) <sup>+</sup>   |
| 574.7876  | 1 | 1656201.71 | C31 H33 F N6 O4 | (M+H) <sup>+</sup>   |
| 575.2682  | 1 | 353125.45  | C31 H33 F N6 O4 | (M+H) <sup>+</sup>   |
| 585.246   | 1 | 279873.81  | C31 H33 F N6 O4 | (M+Na) <sup>+</sup>  |
| 595.2487  | 1 | 96704      | C31 H33 F N6 O4 | (M+Na) <sup>+</sup>  |
| 1143.5194 | 1 | 105373.3   |                 | (2M+H) <sup>+</sup>  |
| 1167.5015 | 1 | 244892.14  |                 | (2M+Na) <sup>+</sup> |
| 1168.5049 | 1 | 175334.98  |                 | (2M+Na) <sup>+</sup> |

— End Of Report —

$^1\text{H}$ NMR (400MHz,  $\text{CDCl}_3$ ) (4d):

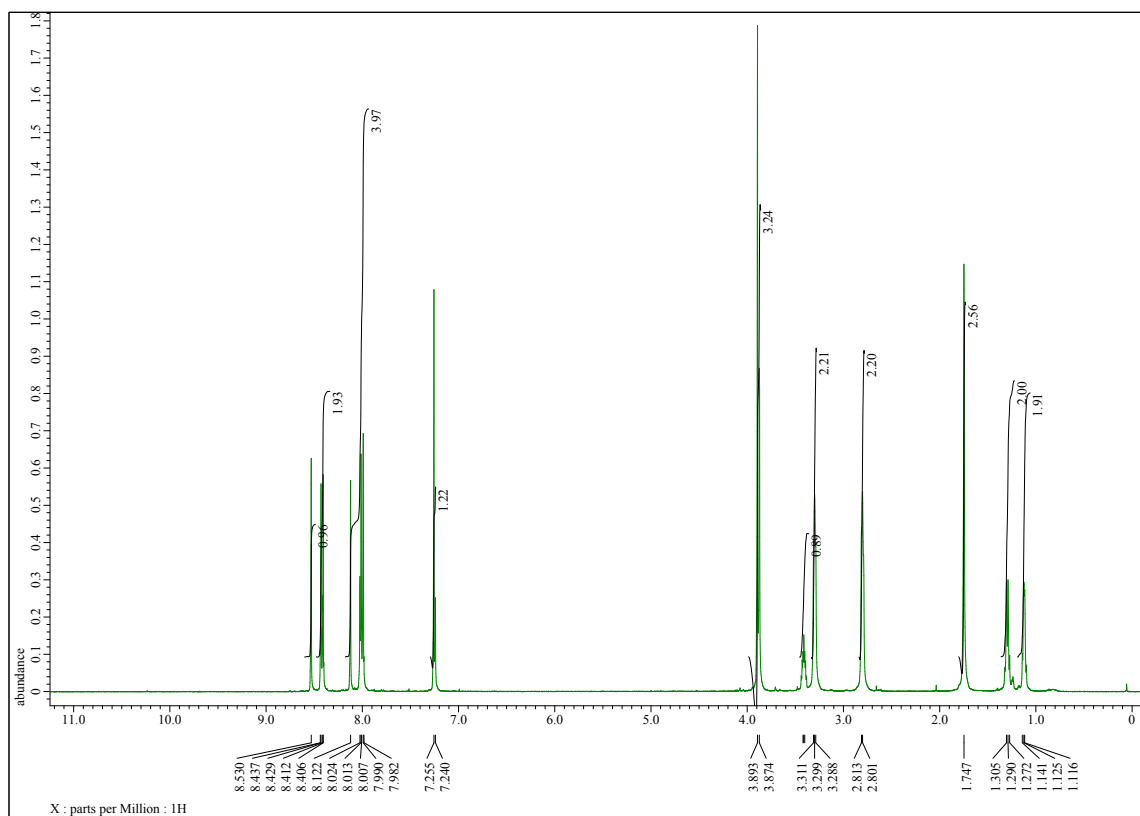

$^{13}\text{C}$ NMR (100MHz,  $\text{CDCl}_3$ ) (4d):

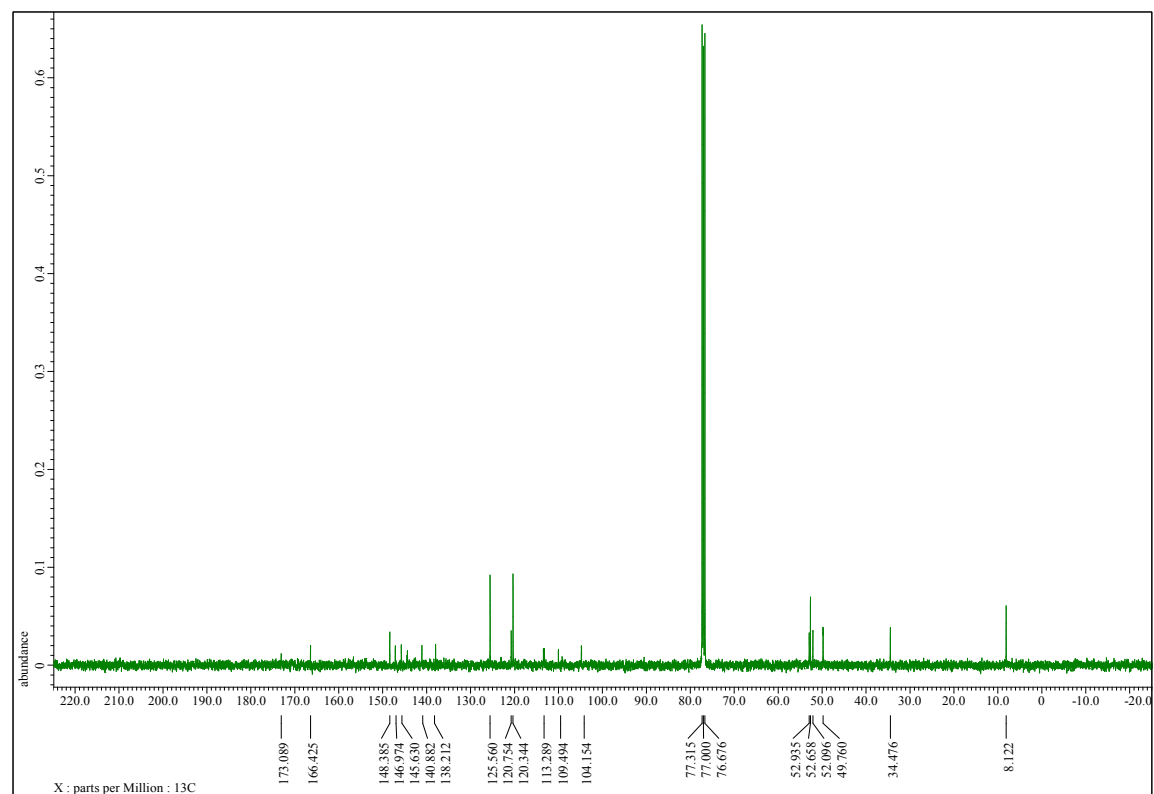



### Qualitative Compound Report

Data File: RK-209.d  
 Sample Type: Sample  
 Instrument Name: Instrument 1  
 Acq Method: Data XL.m  
 IRM Calibration Status: Success  
 Comment:

Sample Name: RK-209  
 Position: P1-B1  
 User Name:

Sample Group:  
 Acquisition SW: 6200 series TOF/5500 series  
 Version: Q-TOF B.05.01 (05125.1)

Info.

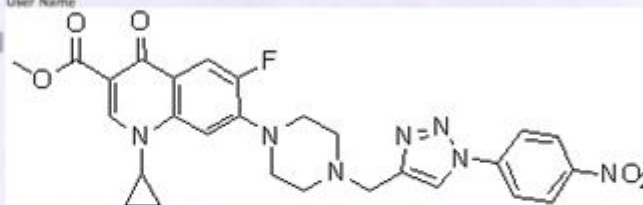

Compound Table

| Compound Label         | RT    | Mass     | Formula         | MFG Formula     | MFG Diff (ppm) | DB Formula      |
|------------------------|-------|----------|-----------------|-----------------|----------------|-----------------|
| Cpd 6: C26 H30 F N3 O9 | 0.096 | 547.1964 | C26 H30 F N3 O9 | C26 H30 F N3 O9 | 0.35           | C26 H30 F N3 O9 |

| Compound Label         | m/z      | RT    | Algorithm                 | Mass     |
|------------------------|----------|-------|---------------------------|----------|
| Cpd 6: C26 H30 F N3 O9 | 548.2041 | 0.096 | Find by Molecular Feature | 547.1964 |

MFE MS Spectrum

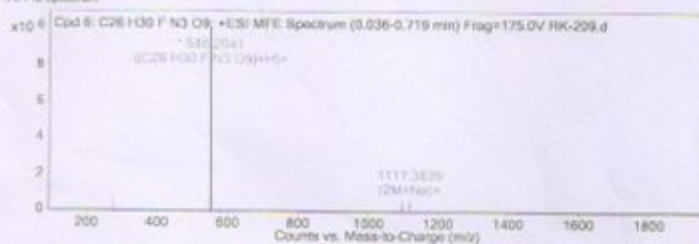

MFE MS Zoomed Spectrum

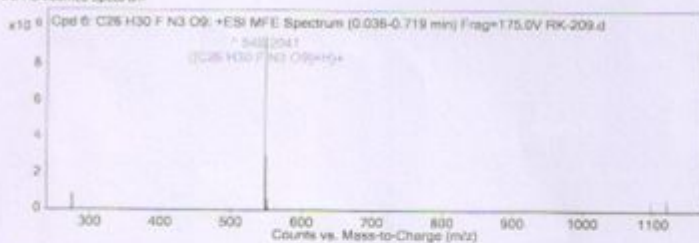

MS Spectrum Peak List

| m/z       | z | Abund      | Formula         | Ion                  |
|-----------|---|------------|-----------------|----------------------|
| 274.6056  | 2 | 796012.94  | C26 H30 F N3 O9 | (M+2H) <sup>2+</sup> |
| 275.1068  | 2 | 256414.09  | C26 H30 F N3 O9 | (M+2H) <sup>2+</sup> |
| 548.2041  | 1 | 9996801    | C26 H30 F N3 O9 | (M+H) <sup>+</sup>   |
| 549.2673  | 1 | 3105845.64 | C26 H30 F N3 O9 | (M+H) <sup>+</sup>   |
| 550.2087  | 1 | 581843.5   | C26 H30 F N3 O9 | (M+H) <sup>+</sup>   |
| 1095.4015 | 1 | 474999.78  |                 | (2M+H) <sup>+</sup>  |
| 1096.4044 | 1 | 301131.12  |                 | (2M+H) <sup>+</sup>  |
| 1117.3839 | 1 | 695914.25  |                 | (2M+Na) <sup>+</sup> |
| 1118.3866 | 1 | 438854.79  |                 | (2M+Na) <sup>+</sup> |
| 1119.3889 | 1 | 148503.42  |                 | (2M+Na) <sup>+</sup> |

— End Of Report —

$^1\text{H}$ NMR (400MHz,  $\text{CDCl}_3$ ) (4e):

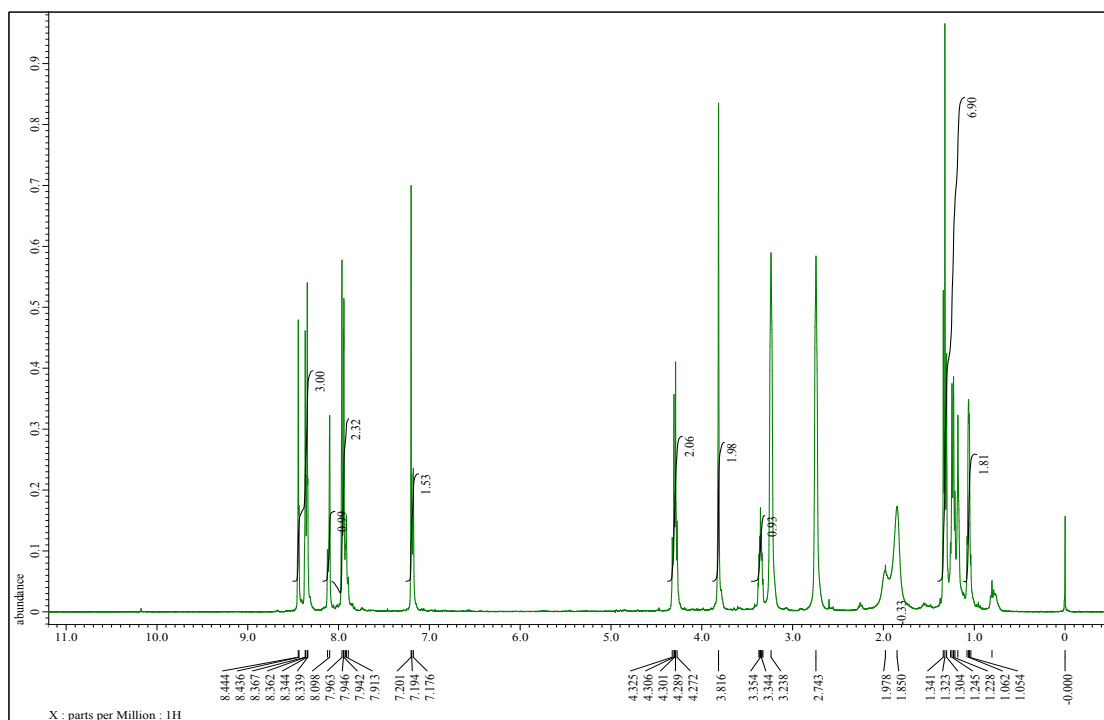

$^{13}\text{C}$ NMR (100MHz,  $\text{CDCl}_3$ ) (4e):

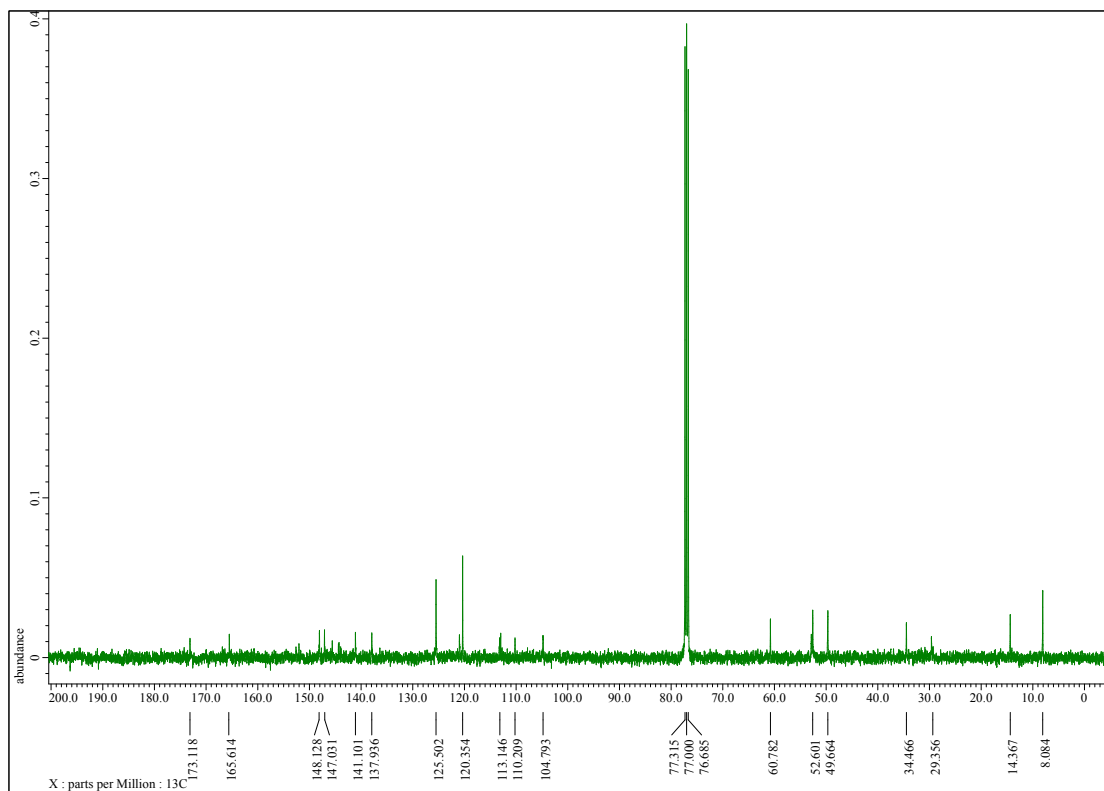

### Qualitative Compound Report

Data File: RK-210.d  
 Sample Type: Sample  
 Instrument Name: Instrument 1  
 Acq Method: Demo\_3K.m  
 IRM Calibration Status: Success  
 Comment:  
 Sample Group:  
 Acquisition SW: 6200 series TOF/MS500 series  
 Version: Q-TOF 8.05.01 (05125-1)

Sample Name: RK-210  
 Position: P1-C3  
 User Name:

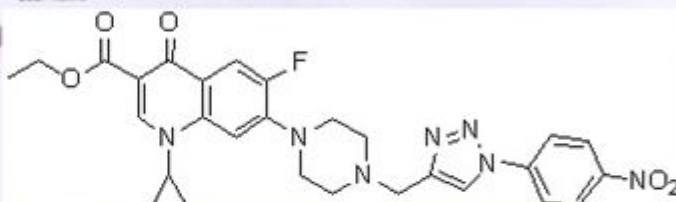

**Compound Table**

| Compound Label         | RT    | Mass     | Formula         | MFG Formula     | MFG Diff (ppm) | DB Formula      |
|------------------------|-------|----------|-----------------|-----------------|----------------|-----------------|
| Cpd 1: C28 H28 F N7 O5 | 0.094 | 561.2133 | C28 H28 F N7 O5 | C28 H28 F N7 O5 | 0.55           | C28 H28 F N7 O5 |

| Compound Label         | m/z      | RT    | Algorithm                 | Mass     |
|------------------------|----------|-------|---------------------------|----------|
| Cpd 1: C28 H28 F N7 O5 | 562.2207 | 0.094 | Find by Molecular Feature | 561.2133 |

**M/E MS Spectrum**

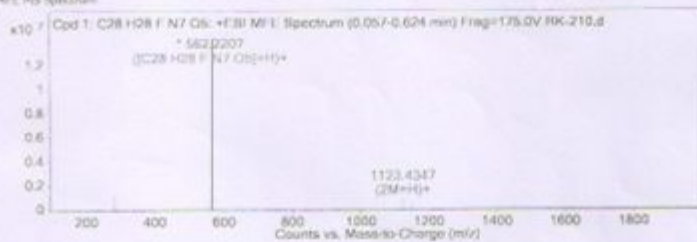

**M/E MS Zoomed Spectrum**

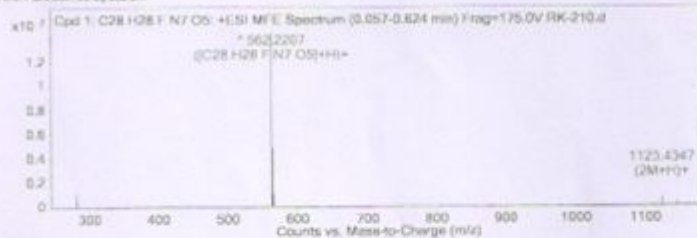

**MS Spectrum Peak List**

| m/z       | z | Abund      | Formula         | Ion       |
|-----------|---|------------|-----------------|-----------|
| 281.6137  | 2 | 1080613.63 | C28 H28 F N7 O5 | [M+20]+2  |
| 282.115   | 2 | 379471.98  | C28 H28 F N7 O5 | [M+20]+2  |
| 562.2207  | 1 | 14387279   | C28 H28 F N7 O5 | [M+10]+   |
| 561.7227  | 1 | 4762086.58 | C28 H28 F N7 O5 | [M+10]+   |
| 564.2243  | 1 | 1042950.81 | C28 H28 F N7 O5 | [M+10]+   |
| 1123.4347 | 1 | 845899.54  |                 | [2M+10]+  |
| 1124.4372 | 1 | 372197.21  |                 | [2M+10]+  |
| 1125.439  | 1 | 708367.61  |                 | [2M+10]+  |
| 1145.4363 | 1 | 375576.34  |                 | [2M+16a]+ |
| 1146.4388 | 1 | 247862.56  |                 | [2M+16a]+ |

-- End Of Report --

$^1\text{H}$ NMR (400MHz,  $\text{CDCl}_3$ ) (4f):

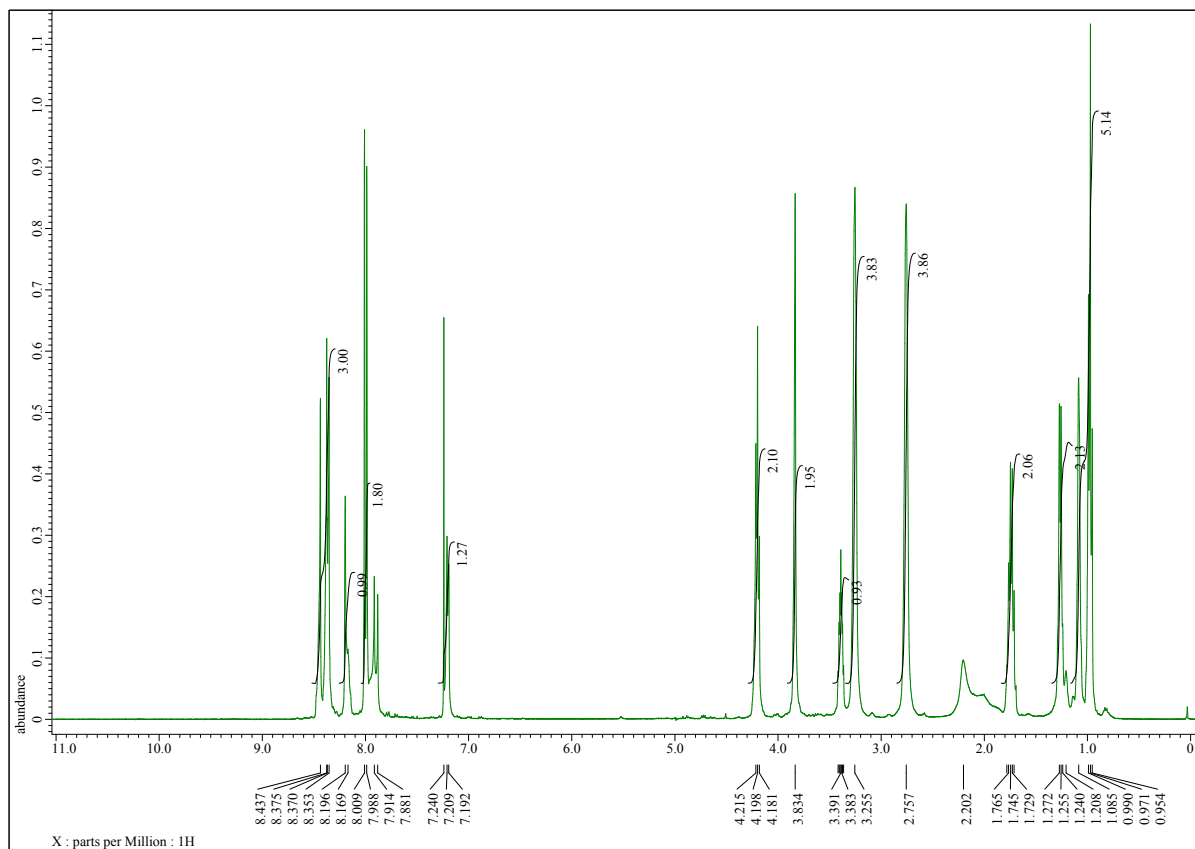

$^{13}\text{C}$ NMR (100MHz,  $\text{CDCl}_3$ ) (4f):

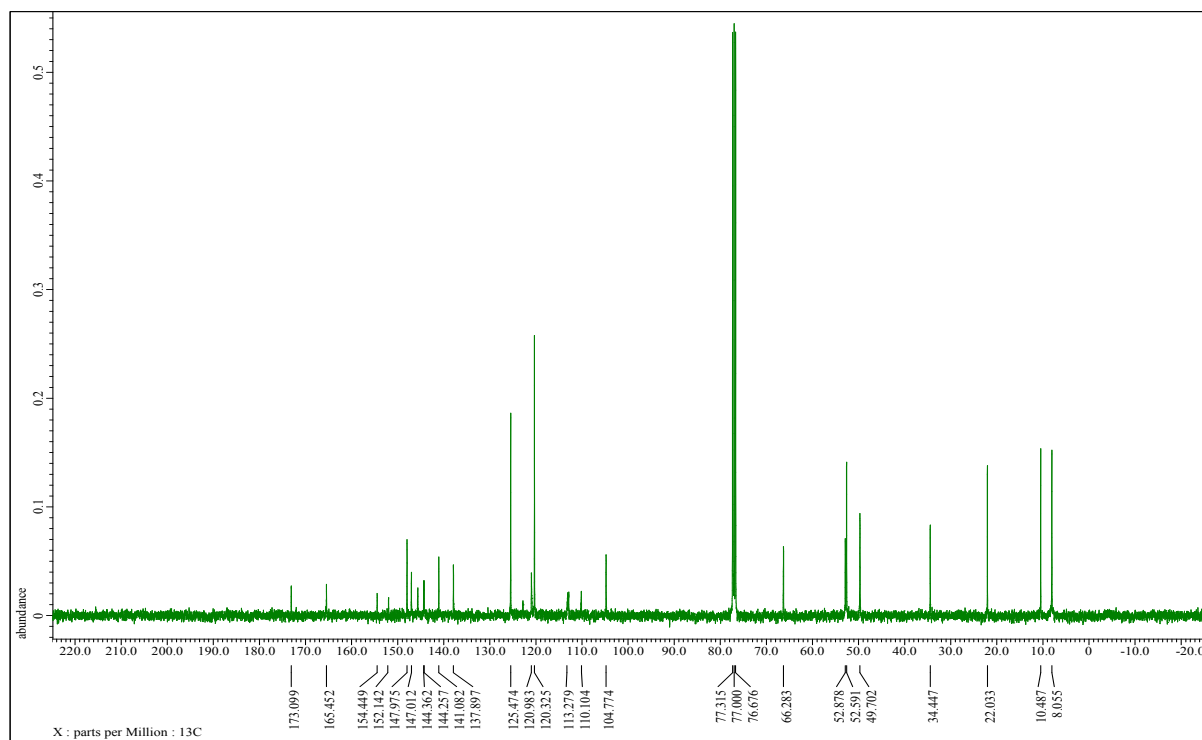

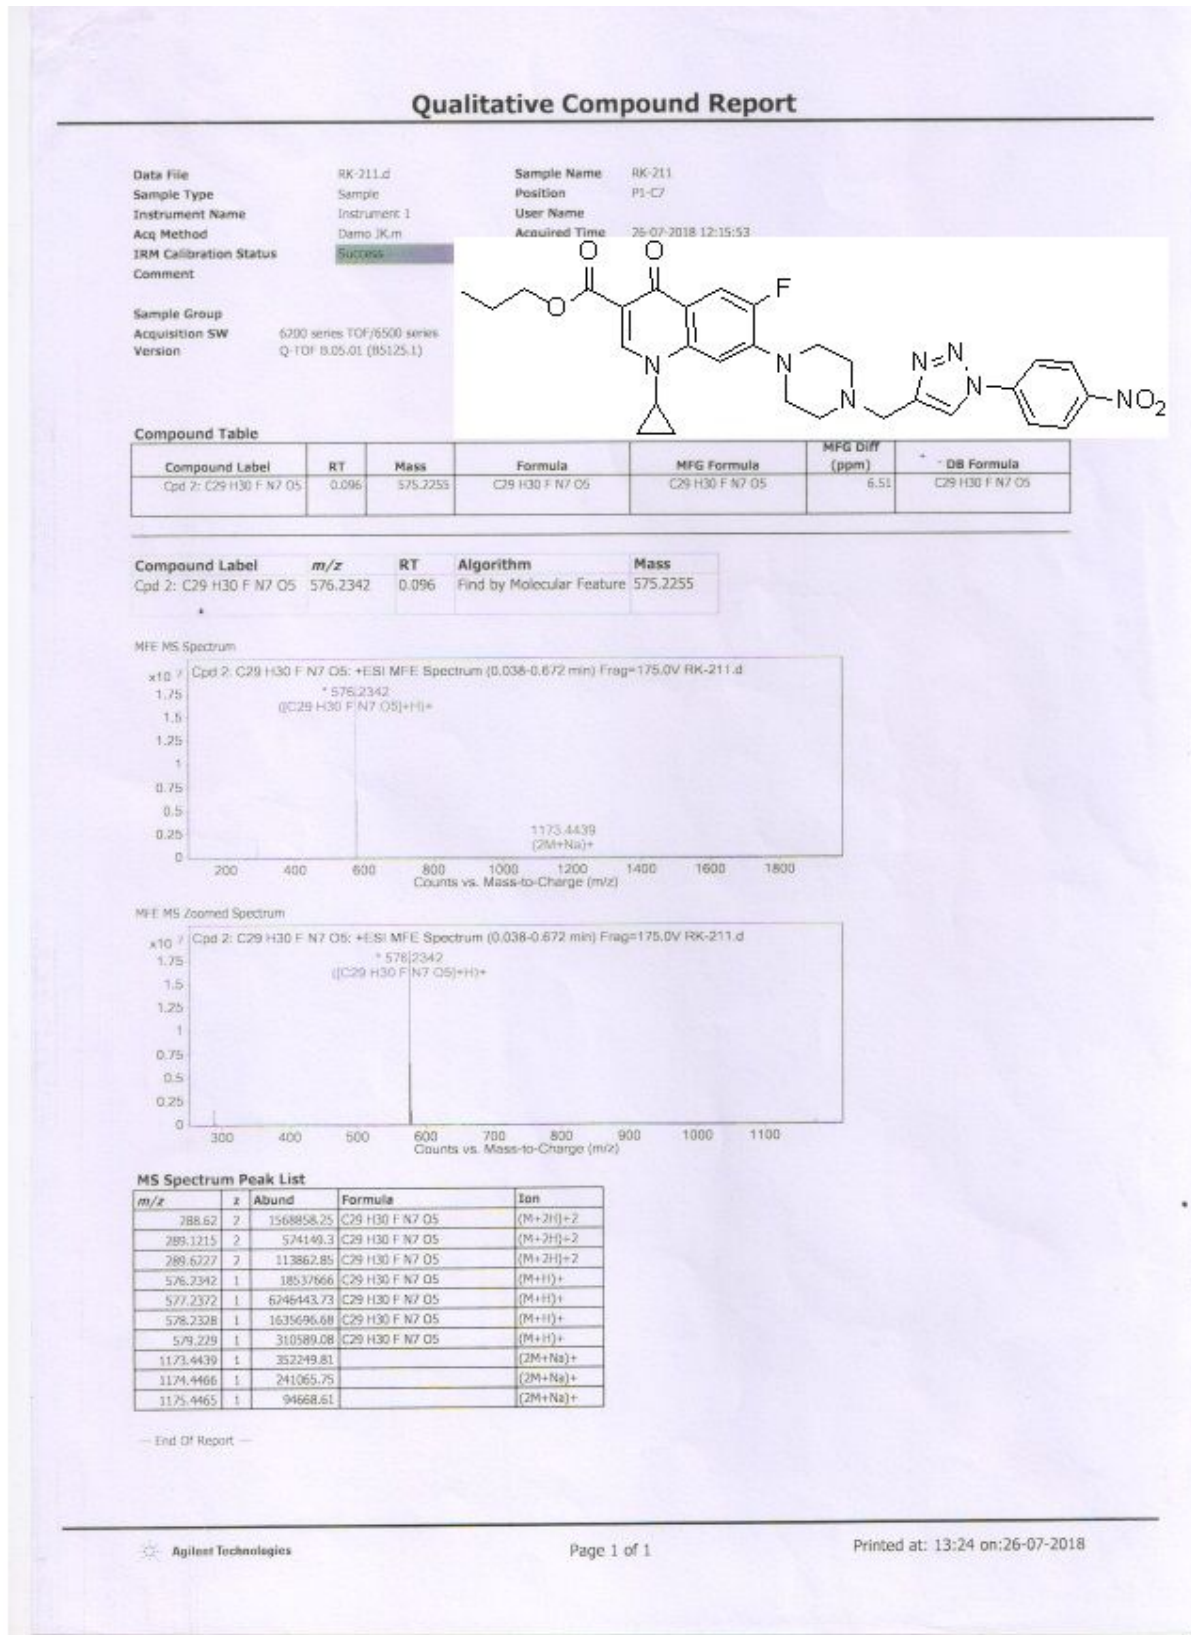

$^1\text{H}$ NMR (400MHz,  $\text{CDCl}_3$ ) (4g):

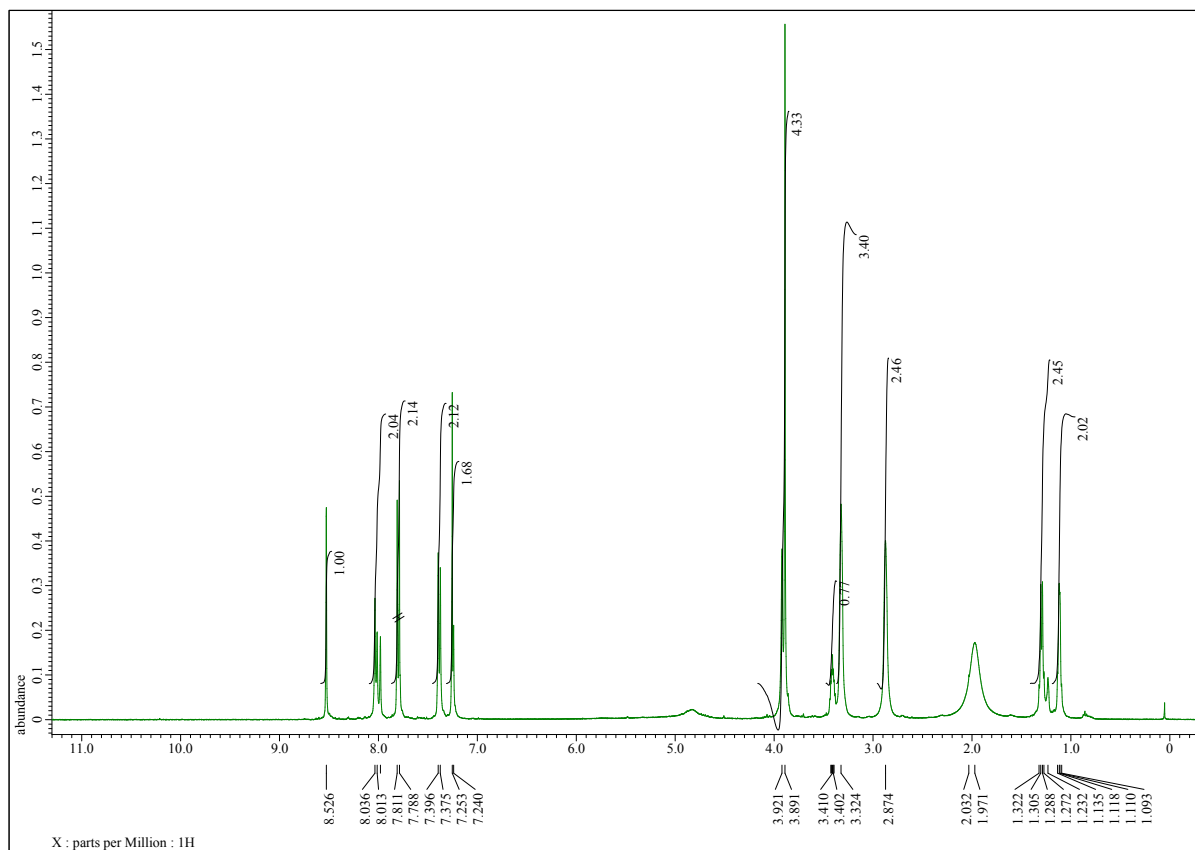

$^{13}\text{C}$ NMR (100MHz,  $\text{CDCl}_3$ ) (4g):

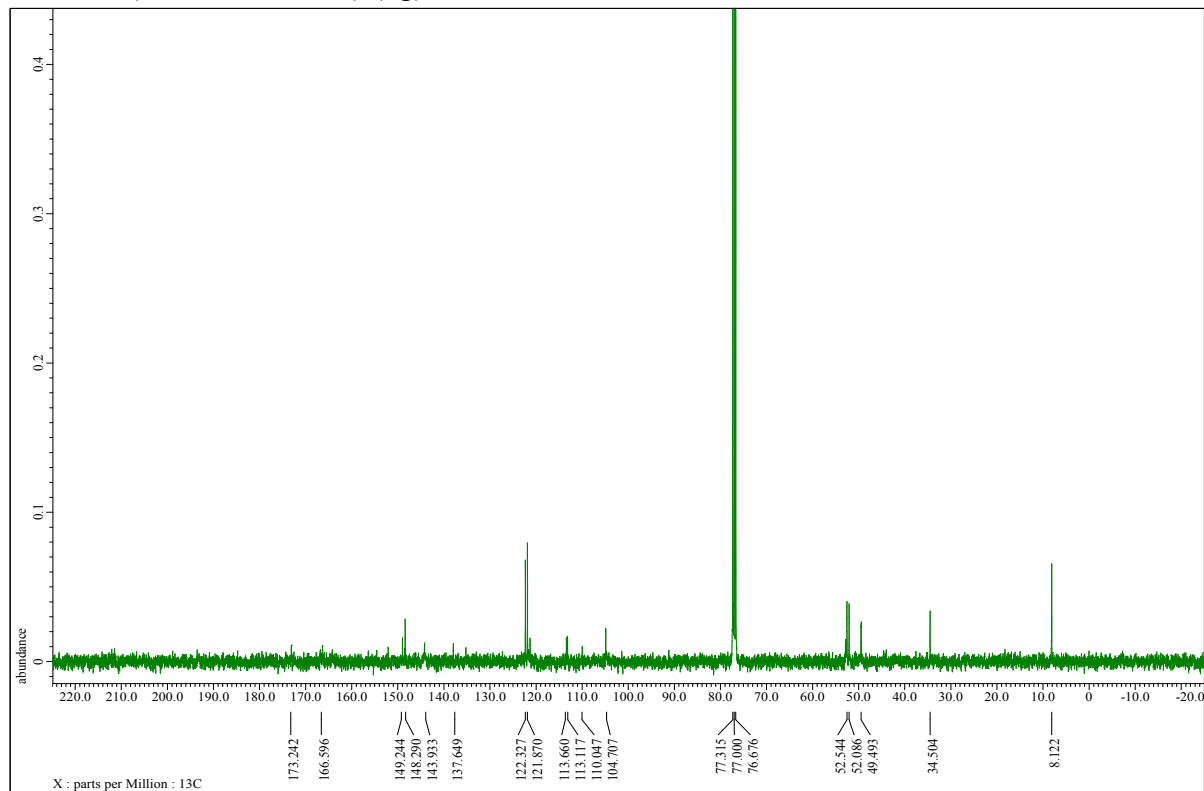

### Qualitative Compound Report

Data File: RK-213.d  
 Sample Type: Sample  
 Instrument Name: Instrument 1  
 Acq Method: Demo JK.m  
 IRM Calibration Status: Success  
 Comment:

Sample Name: RK-213  
 Position: P1-E3  
 User Name:

Sample Group:  
 Acquisition SW: 6200 series TOF/MS00 Series  
 Version: Q-ToF B.05.01 (05125.1)

Info.

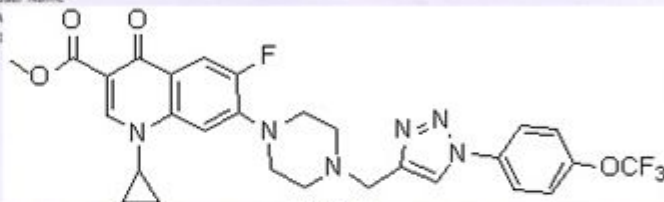

Compound Table

| Compound Label          | RT  | Mass    | Formula          | MFG Formula      | MFu Unit (ppm) | DB Formula       |
|-------------------------|-----|---------|------------------|------------------|----------------|------------------|
| Cpd 1: C28 H26 F4 N6 O4 | 0.1 | 586.196 | C28 H26 F4 N6 O4 | C28 H26 F4 N6 O4 | -1.43          | C28 H26 F4 N6 O4 |

| Compound Label          | m/z      | RT  | Algorithm                 | Mass    |
|-------------------------|----------|-----|---------------------------|---------|
| Cpd 1: C28 H26 F4 N6 O4 | 587.2032 | 0.1 | Find by Molecular Feature | 586.196 |

MFI MS Spectrum

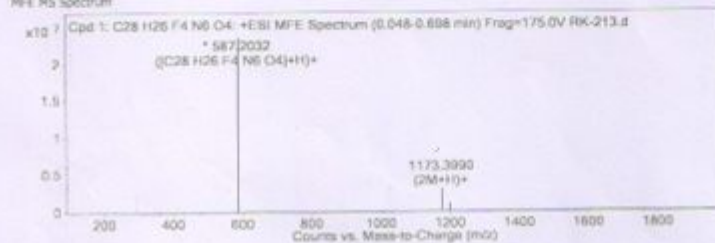

MFE MS Zoomed Spectrum

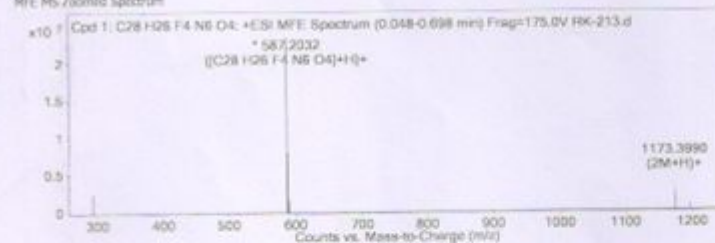

MS Spectrum Peak List

| m/z       | z | Abund      | Formula          | Ion                  |
|-----------|---|------------|------------------|----------------------|
| 294.1052  | 2 | 2413613    | C28 H26 F4 N6 O4 | (M+2H) <sup>2+</sup> |
| 294.607   | 2 | 832014.05  | C28 H26 F4 N6 O4 | (M+2H) <sup>2+</sup> |
| 587.2032  | 1 | 2333068    | C28 H26 F4 N6 O4 | (M+H) <sup>+</sup>   |
| 588.2063  | 1 | 2548727.66 | C28 H26 F4 N6 O4 | (M+H) <sup>+</sup>   |
| 589.2029  | 1 | 1728404.27 | C28 H26 F4 N6 O4 | (M+H) <sup>+</sup>   |
| 1173.399  | 1 | 2863556.5  |                  | (2M+H) <sup>+</sup>  |
| 1174.4024 | 1 | 1894933.18 |                  | (2M+H) <sup>+</sup>  |
| 1175.4048 | 1 | 695657.05  |                  | (2M+H) <sup>+</sup>  |
| 1195.3812 | 1 | 534554.75  |                  | (2M+Na) <sup>+</sup> |
| 1196.3841 | 1 | 619710.23  |                  | (2M+Na) <sup>+</sup> |

-- End Of Report --

$^1\text{H}$ NMR (400MHz,  $\text{CDCl}_3$ ) (4h):

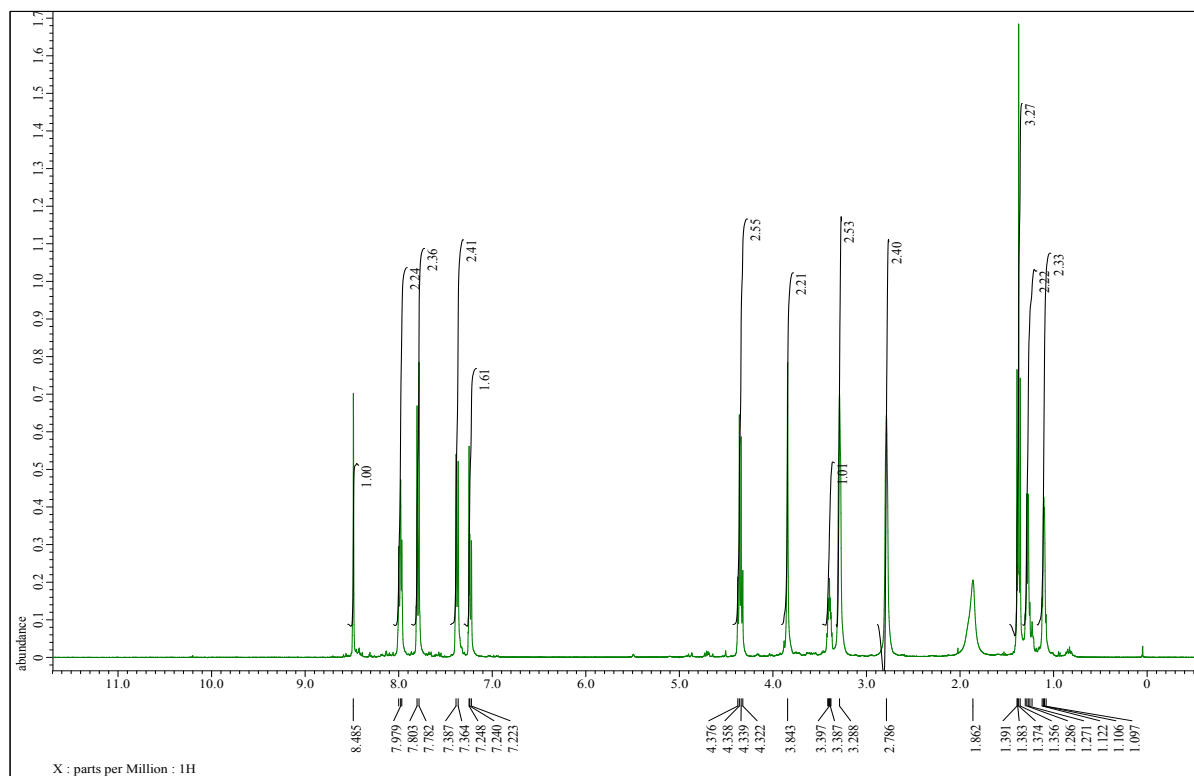

$^{13}\text{C}$ NMR (100MHz,  $\text{CDCl}_3$ ) (4h):

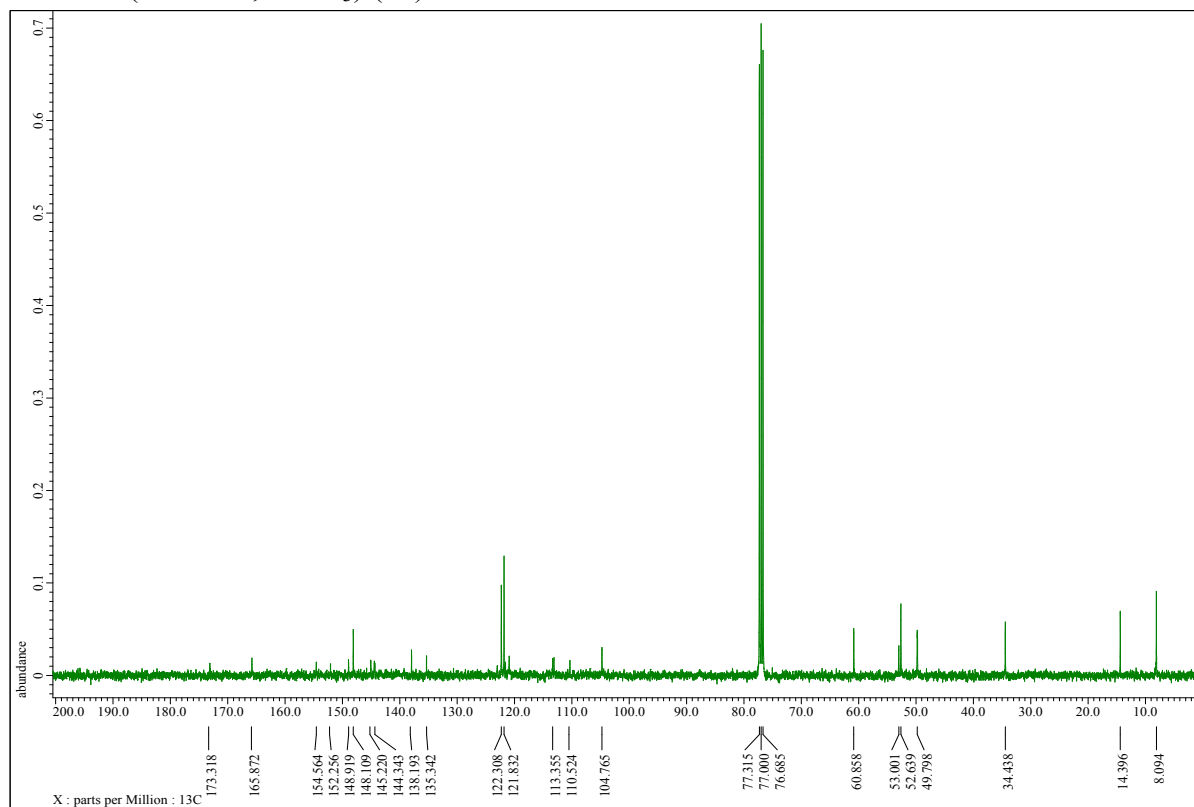



### Qualitative Compound Report

Data File: RK-214.d  
 Sample Type: Sample  
 Instrument Name: Instrument 1  
 Acq Method: Demo 3K.m  
 IRM Calibration Status: Success  
 Comment:  
 Sample Group:  
 Acquisition SW: 6200 series TOF/MS/MS series  
 Version: Q-TOF 8.05.01 (05125.1)

Sample Name: RK-214  
 Position: P1-77

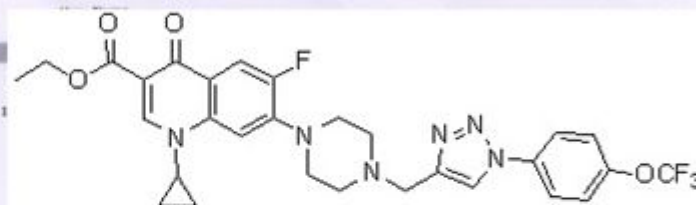

**Compound Table**

| Compound Label          | RT    | Mass     | Formula          | MFG Formula      | MFG Diff (ppm) | DB Formula       |
|-------------------------|-------|----------|------------------|------------------|----------------|------------------|
| Cpd 3: C29 H28 F4 N6 O4 | 0.096 | 600.2118 | C29 H28 F4 N6 O4 | C29 H28 F4 N6 O4 | -1.28          | C29 H28 F4 N6 O4 |

| Compound Label          | m/z      | RT    | Algorithm                 | Mass     |
|-------------------------|----------|-------|---------------------------|----------|
| Cpd 3: C29 H28 F4 N6 O4 | 601.2188 | 0.096 | Find by Molecular Feature | 600.2116 |

**MFE MS Spectrum**

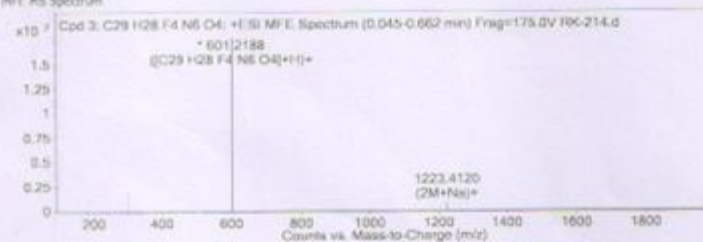

**MFE MS Zoomed Spectrum**

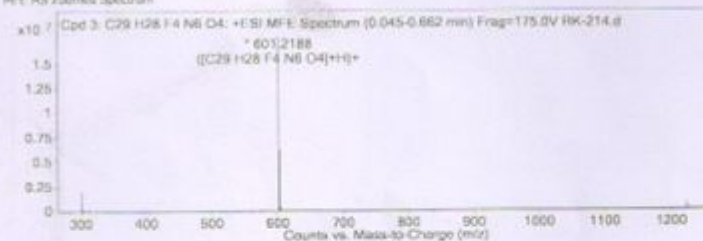

**MS Spectrum Peak List**

| m/z       | z | Abund      | Formula          | Ion      |
|-----------|---|------------|------------------|----------|
| 301.1131  | 2 | 1980274.13 | C29 H28 F4 N6 O4 | (M+2H)+2 |
| 301.6146  | 2 | 713387     | C29 H28 F4 N6 O4 | (M+2H)+2 |
| 302.1158  | 2 | 134007.63  | C29 H28 F4 N6 O4 | (M+2H)+2 |
| 601.2188  | 1 | 17751898   | C29 H28 F4 N6 O4 | (M+H)+   |
| 602.2219  | 1 | 6074903.97 | C29 H28 F4 N6 O4 | (M+H)+   |
| 603.2159  | 1 | 1600136.88 | C29 H28 F4 N6 O4 | (M+H)+   |
| 604.2116  | 1 | 336915.82  | C29 H28 F4 N6 O4 | (M+H)+   |
| 1223.412  | 1 | 808314     |                  | (2M+N2)+ |
| 1224.4148 | 1 | 594606.62  |                  | (2M+N2)+ |
| 1225.4146 | 1 | 211569.69  |                  | (2M+N2)+ |

--- End Of Report ---

$^1\text{H}$ NMR (400MHz,  $\text{CDCl}_3$ ) (4i):

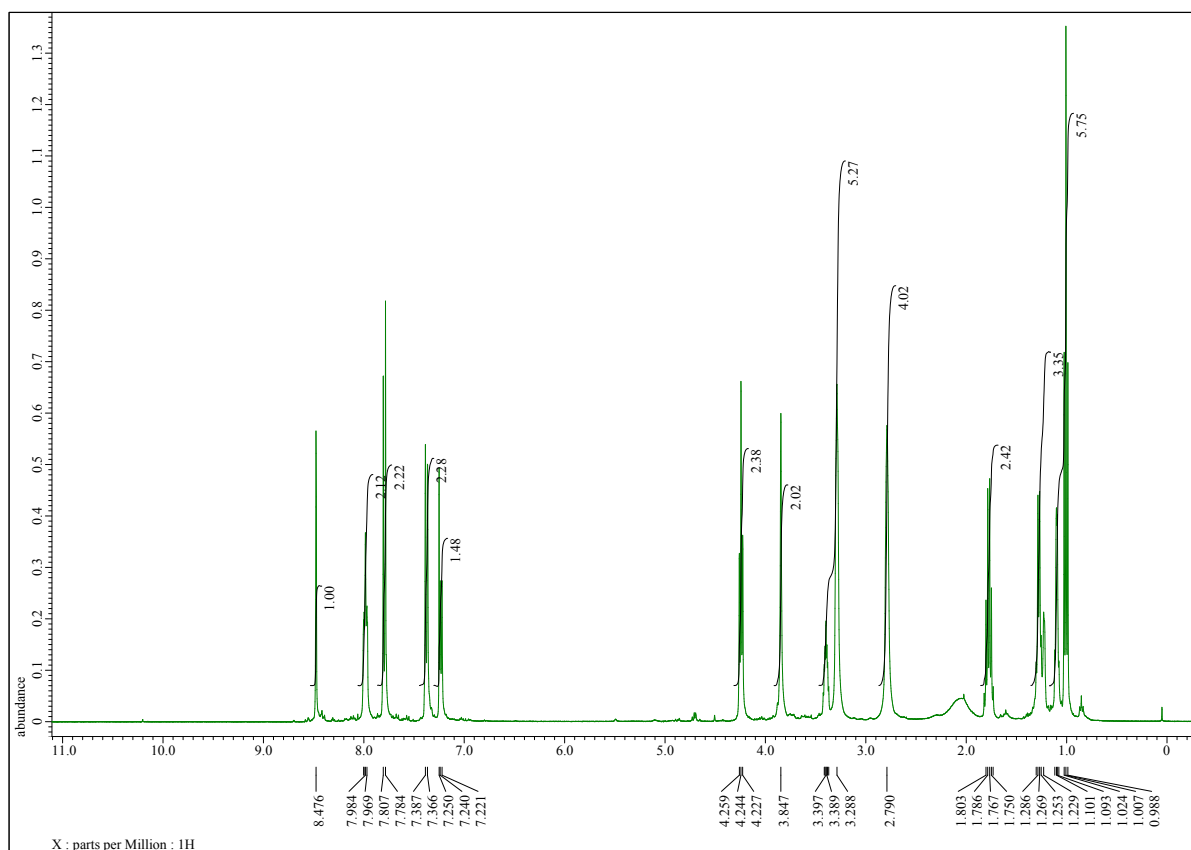

$^{13}\text{C}$ NMR (100MHz,  $\text{CDCl}_3$ ) (4i):

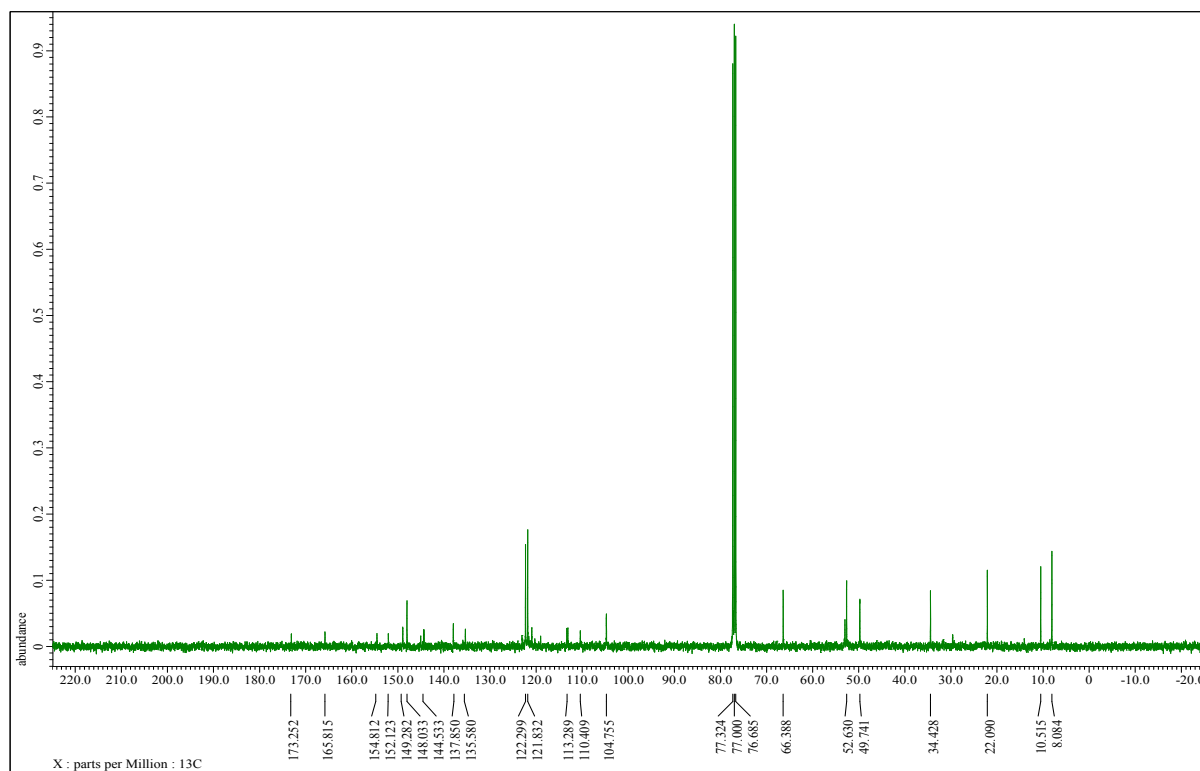

### Qualitative Compound Report

Data File: RK-215.d  
 Sample Type: Sample  
 Instrument Name: Instrument 1  
 Acq Method: Data JK.m  
 IRM Calibration Status: Success  
 Comment:  
 Sample Group:  
 Acquisition SW: 6200 series TOF/6500 series  
 Version: Q-TOF R.05.01 (R0125-1)

Sample Name: RK-215  
 Position: P1-01  
 User Name:

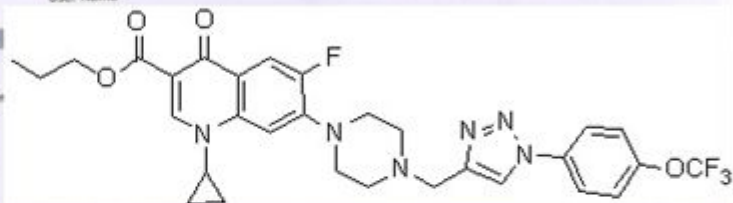

**Compound Table**

| Compound Label          | RT    | Mass     | Formula          | MFG Formula      | MFG Diff (ppm) | DB Formula       |
|-------------------------|-------|----------|------------------|------------------|----------------|------------------|
| Cpd 2: C30 H30 F4 N6 O4 | 0.126 | 614.2292 | C30 H30 F4 N6 O4 | C30 H30 F4 N6 O4 | -4.45          | C30 H30 F4 N6 O4 |

| Compound Label          | m/z      | RT    | Algorithm                 | Mass     |
|-------------------------|----------|-------|---------------------------|----------|
| Cpd 2: C30 H30 F4 N6 O4 | 615.2359 | 0.126 | Find by Molecular Feature | 614.2292 |

**MFE MS Spectrum**

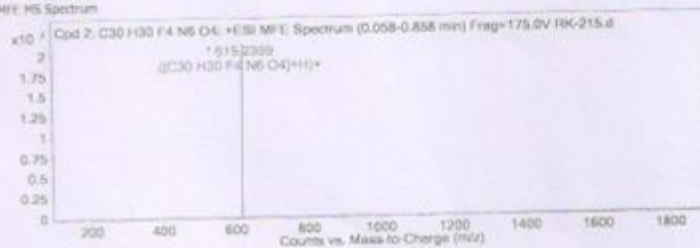

**MFE MS Zoomed Spectrum**

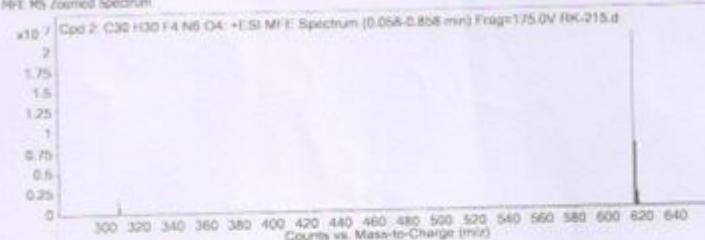

**MS Spectrum Peak List**

| m/z      | z | Abund       | Formula          | Ion      |
|----------|---|-------------|------------------|----------|
| 308.1219 | 2 | 1.780991.13 | C30 H30 F4 N6 O4 | (M+2H)+2 |
| 308.6234 | 2 | 6.30276.88  | C30 H30 F4 N6 O4 | (M+2H)+2 |
| 309.1245 | 2 | 12.0565.31  | C30 H30 F4 N6 O4 | (M+2H)+2 |
| 309.6259 | 2 | 18.700.14   | C30 H30 F4 N6 O4 | (M+2H)+2 |
| 615.2359 | 1 | 71.28575.7  | C30 H30 F4 N6 O4 | (M+H)+   |
| 616.239  | 1 | 241.3776.39 | C30 H30 F4 N6 O4 | (M+H)+   |
| 617.2318 | 1 | 205.7178.09 | C30 H30 F4 N6 O4 | (M+H)+   |
| 618.2276 | 1 | 421046.95   | C30 H30 F4 N6 O4 | (M+H)+   |
| 619.2263 | 1 | 66993.83    | C30 H30 F4 N6 O4 | (M+H)+   |
| 620.2283 | 1 | 18694.97    | C30 H30 F4 N6 O4 | (M+H)+   |

— End Of Report —

$^1\text{H}$ NMR (400MHz,  $\text{CDCl}_3$ ) (4j):

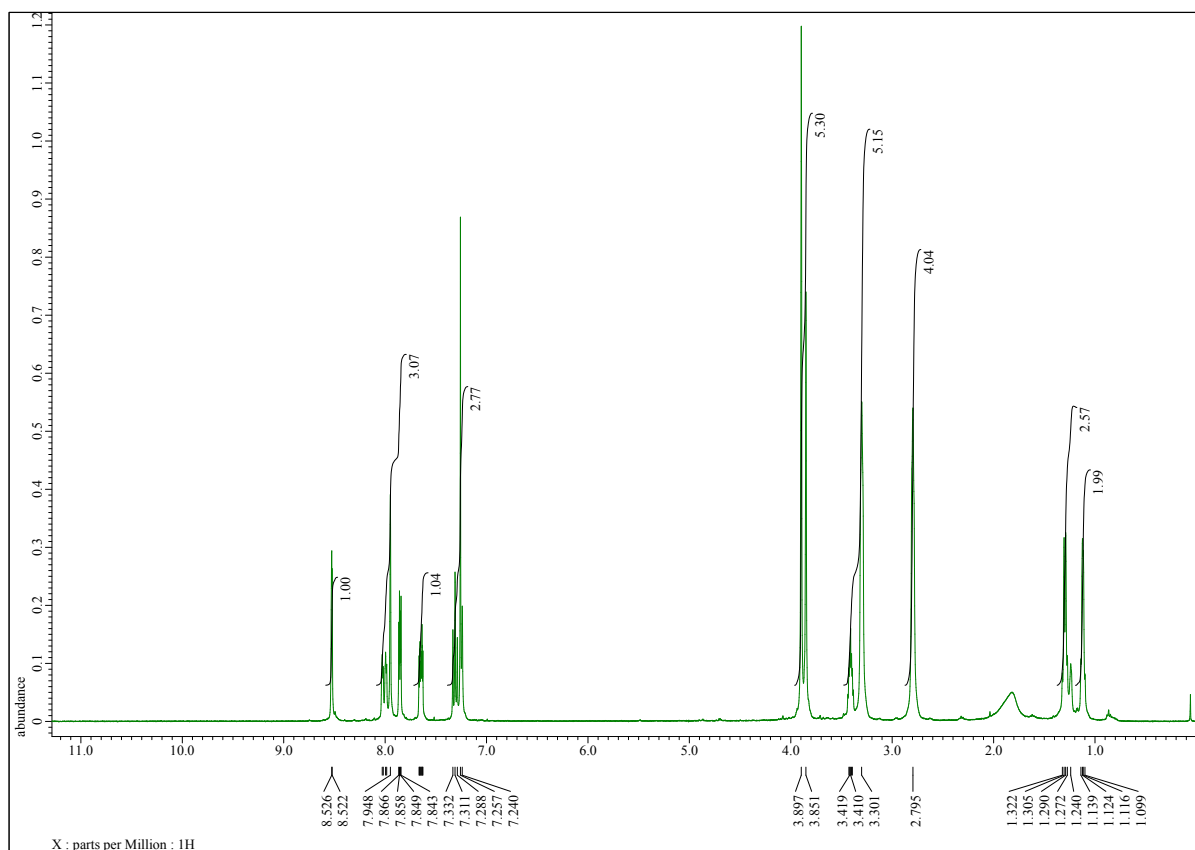

$^{13}\text{C}$ NMR (100MHz,  $\text{CDCl}_3$ ) (4j):

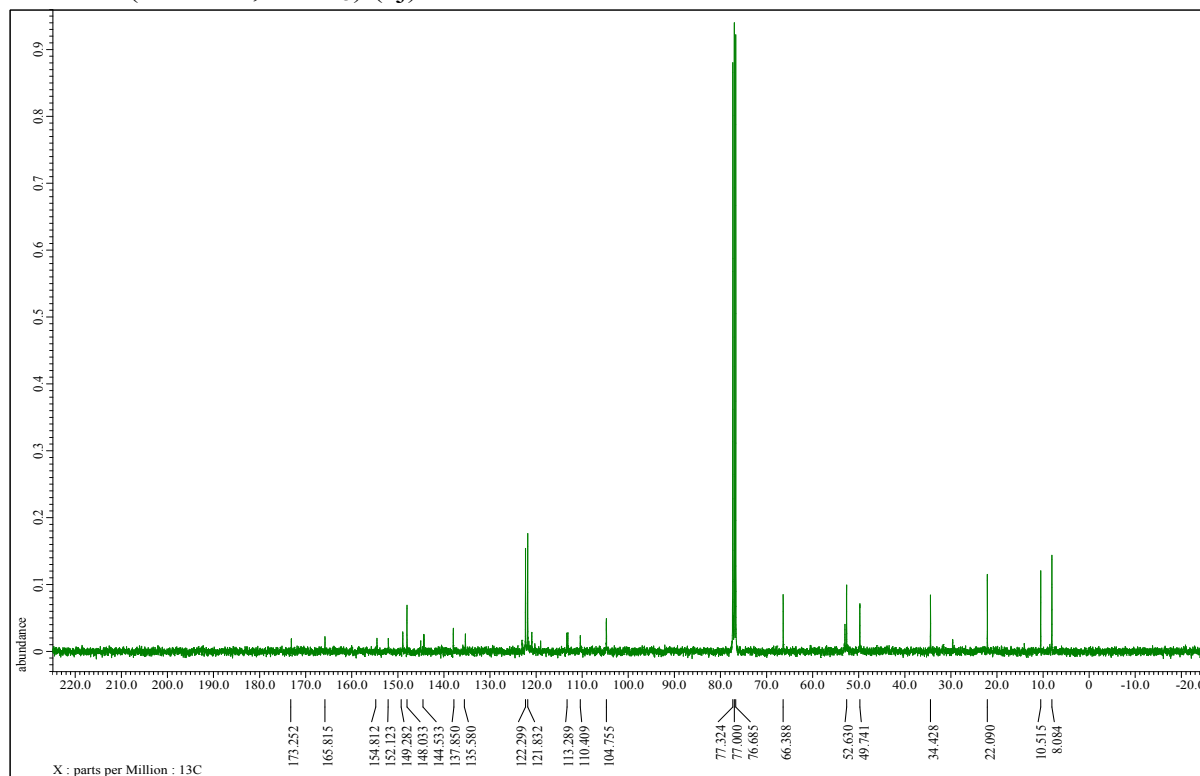

### Qualitative Compound Report

Data File: RK-216.d  
 Sample Type: Sample  
 Instrument Name: Instrument 1  
 Acq Method: Demo JK.m  
 IRM Calibration Status: Success  
 Comment:

Sample Name: RK-216  
 Posit:  
 User:  
 Acq:  
 DA M:

Sample Group:  
 Acquisition SW: 6200 series TOF/6500 series  
 Version: Q-TOF B.05.01 (B5125.1)

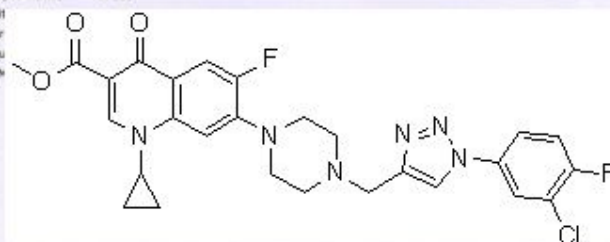

**Compound Table**

| Compound Label             | RT    | Mass     | Formula             | MFG Formula         | MFG Diff (ppm) | DB Formula          |
|----------------------------|-------|----------|---------------------|---------------------|----------------|---------------------|
| Cpd 1: C27 H25 Cl F2 N6 O3 | 0.098 | 554.1615 | C27 H25 Cl F2 N6 O3 | C27 H25 Cl F2 N6 O3 | 5.31           | C27 H25 Cl F2 N6 O3 |

| Compound Label             | m/z      | RT    | Algorithm                 | Mass     |
|----------------------------|----------|-------|---------------------------|----------|
| Cpd 1: C27 H25 Cl F2 N6 O3 | 555.1691 | 0.098 | Find by Molecular Feature | 554.1615 |

**MFE MS Spectrum**

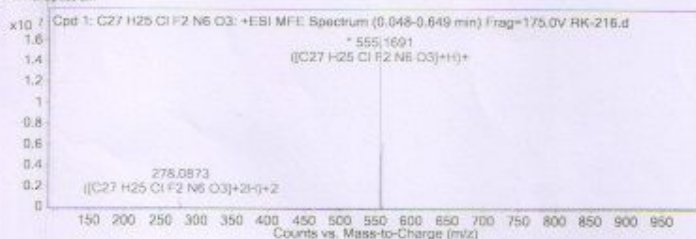

**MFE MS Zoomed Spectrum**

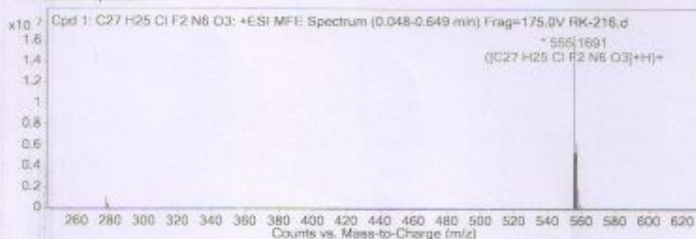

**MS Spectrum Peak List**

| m/z      | z | Abund      | Formula             | Ion      |
|----------|---|------------|---------------------|----------|
| 278.0873 | 2 | 100778.81  | C27 H25 Cl F2 N6 O3 | (M+2H)+2 |
| 278.5885 | 2 | 378919.06  | C27 H25 Cl F2 N6 O3 | (M+2H)+2 |
| 279.0864 | 2 | 384401.68  | C27 H25 Cl F2 N6 O3 | (M+2H)+2 |
| 279.5872 | 2 | 110633.91  | C27 H25 Cl F2 N6 O3 | (M+2H)+2 |
| 555.1691 | 1 | 16964043   | C27 H25 Cl F2 N6 O3 | (M+H)+   |
| 555.172  | 1 | 5736108.86 | C27 H25 Cl F2 N6 O3 | (M+H)+   |
| 557.1666 | 1 | 6292320.78 | C27 H25 Cl F2 N6 O3 | (M+H)+   |
| 558.169  | 1 | 1851844.14 | C27 H25 Cl F2 N6 O3 | (M+H)+   |
| 559.1664 | 1 | 365034.67  | C27 H25 Cl F2 N6 O3 | (M+H)+   |
| 560.1621 | 1 | 58394.26   | C27 H25 Cl F2 N6 O3 | (M+H)+   |

— End Of Report —

$^1\text{H}$ NMR (400MHz,  $\text{CDCl}_3$ ) (4k):

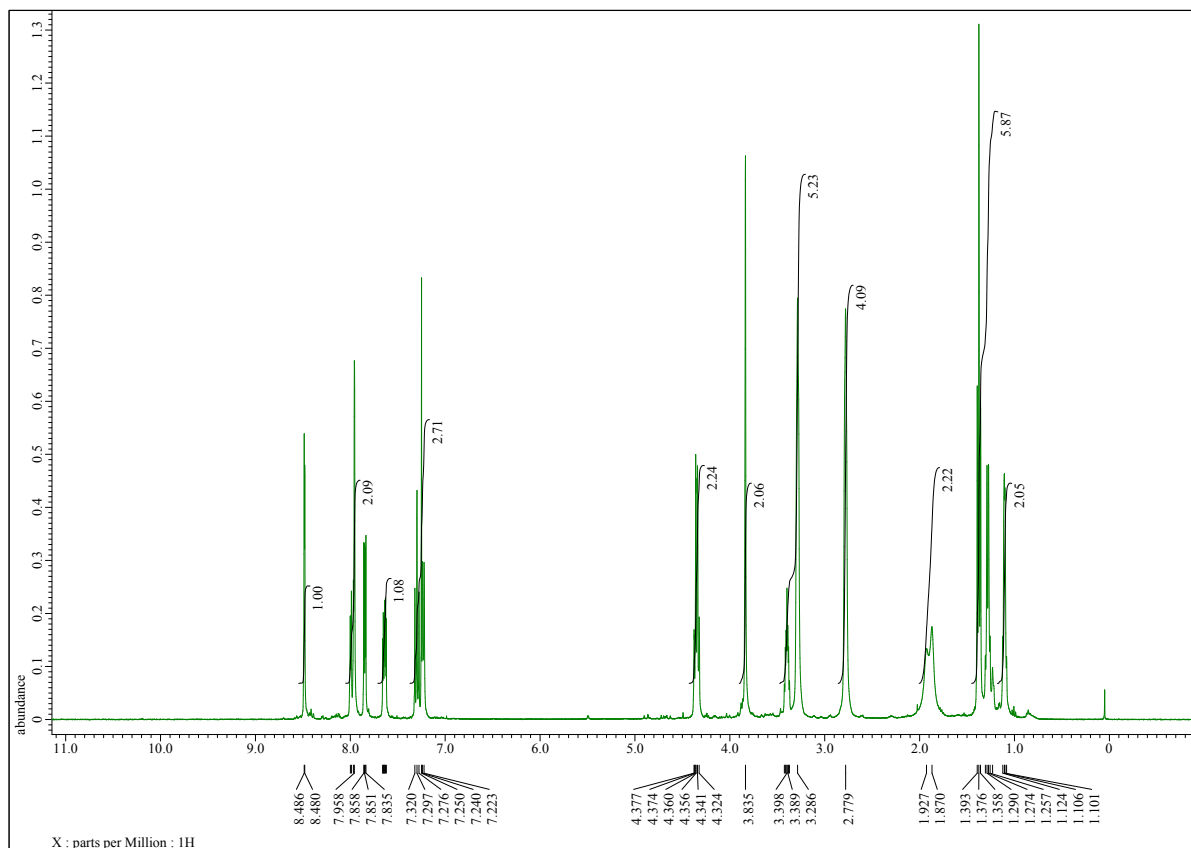

$^{13}\text{C}$ NMR (100MHz,  $\text{CDCl}_3$ ) (4k)

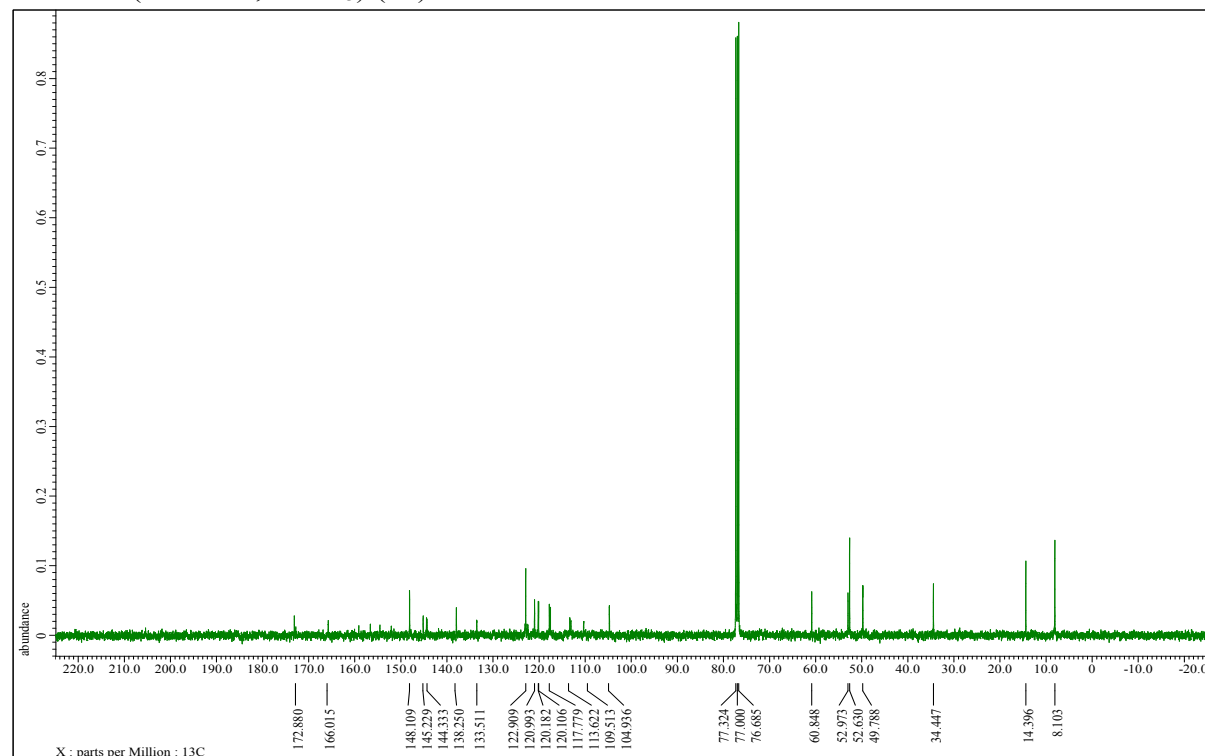

### Qualitative Compound Report

Data File: RK-217.d  
 Sample Type: Sample  
 Instrument Name: Instrument 1  
 Acq Method: Demo JK.m  
 IRM Calibration Status: Success  
 Comment:

Sample Name: RK-217

Sample Group:  
 Acquisition SW: 6200 series TOF/6500 series  
 Version: Q-TOF B.05.01 (HS125.1)

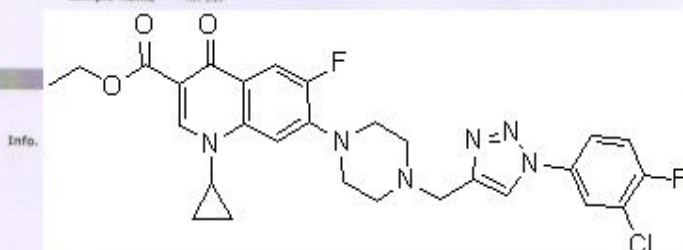

Compound Table

| Compound Label             | RT    | Mass     | Formula             | MFG Formula         | MFG Diff (ppm) | DB Formula          |
|----------------------------|-------|----------|---------------------|---------------------|----------------|---------------------|
| Cpd 1: C28 H27 Cl F2 N6 O3 | 0.101 | 568.1773 | C28 H27 Cl F2 N6 O3 | C28 H27 Cl F2 N6 O3 | 4.99           | C28 H27 Cl F2 N6 O3 |

| Compound Label             | m/z      | RT    | Algorithm                 | Mass     |
|----------------------------|----------|-------|---------------------------|----------|
| Cpd 1: C28 H27 Cl F2 N6 O3 | 569.1845 | 0.101 | Find by Molecular Feature | 568.1773 |

MFE MS Spectrum

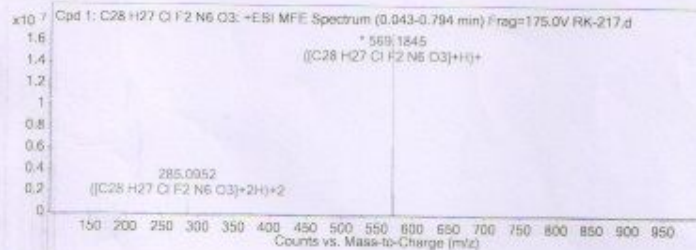

MFE MS Zoomed Spectrum

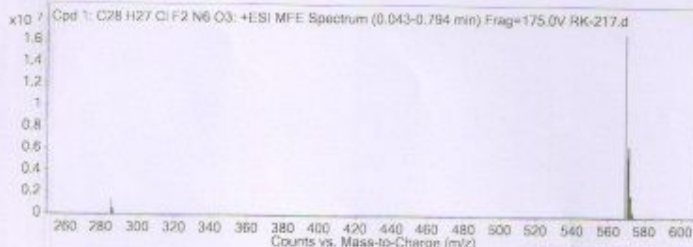

MS Spectrum Peak List

| m/z      | z | Abund      | Formula             | Ion      |
|----------|---|------------|---------------------|----------|
| 285.0952 | 2 | 1318661.75 | C28 H27 Cl F2 N6 O3 | (M+2H)+2 |
| 285.5965 | 2 | 428011.33  | C28 H27 Cl F2 N6 O3 | (M+2H)+2 |
| 286.0943 | 2 | 500830.47  | C28 H27 Cl F2 N6 O3 | (M+2H)+2 |
| 286.5952 | 2 | 152558.64  | C28 H27 Cl F2 N6 O3 | (M+2H)+2 |
| 569.1845 | 1 | 16861050   | C28 H27 Cl F2 N6 O3 | (M+H)+   |
| 570.1878 | 1 | 5598747.26 | C28 H27 Cl F2 N6 O3 | (M+H)+   |
| 571.1829 | 1 | 6339970.97 | C28 H27 Cl F2 N6 O3 | (M+H)+   |
| 572.1854 | 1 | 1979875.38 | C28 H27 Cl F2 N6 O3 | (M+H)+   |
| 573.186  | 1 | 368464.47  | C28 H27 Cl F2 N6 O3 | (M+H)+   |
| 574.185  | 1 | 49790.05   | C28 H27 Cl F2 N6 O3 | (M+H)+   |

— End Of Report —

$^1\text{H}$ NMR (400MHz,  $\text{CDCl}_3$ ) (4l):

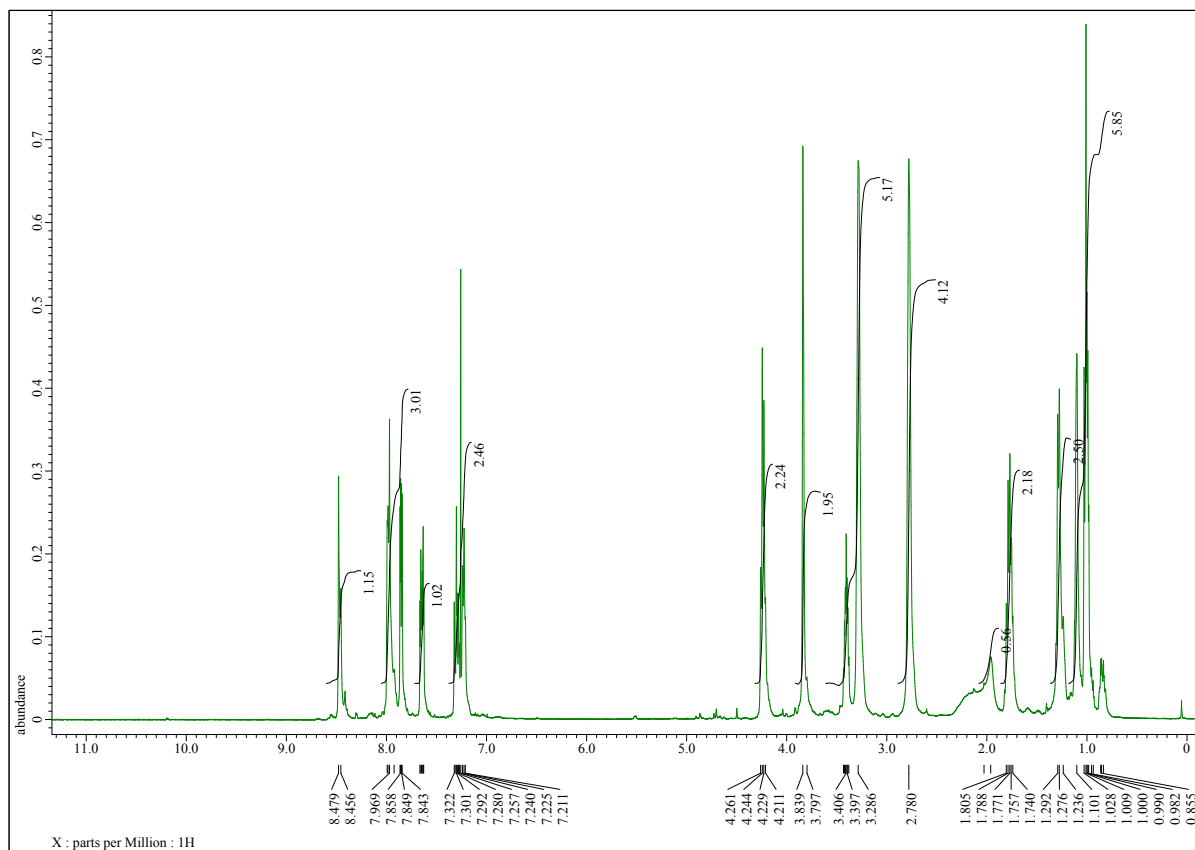

$^{13}\text{C}$ NMR (100MHz,  $\text{CDCl}_3$ ) (4l):

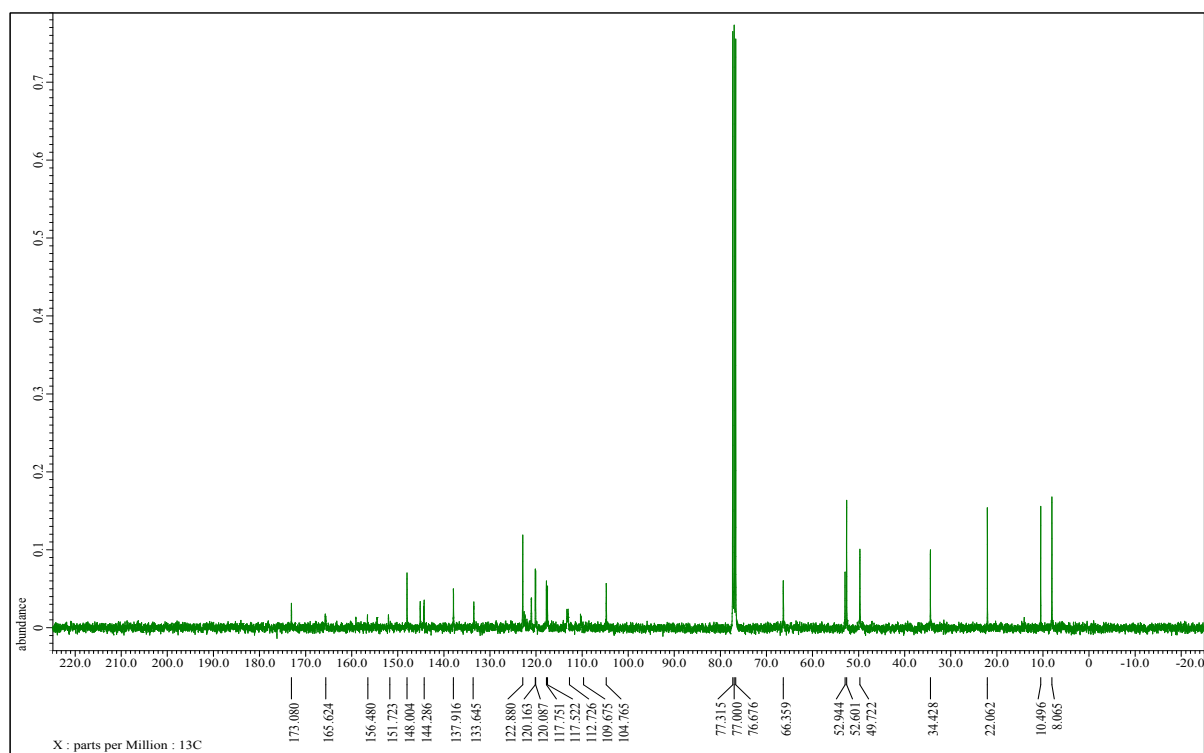



### Qualitative Compound Report

Data File: RK-218.d  
 Sample Type: Sample  
 Instrument Name: Instrument 1  
 Acq Method: Data 3K.m  
 IRM Calibration Status: Success  
 Comment:

Sample Group: Info.  
 Acquisition SW: 6.00 series 100/6500 series  
 Version: Q-TOF 8.05.01 (R5125.1)

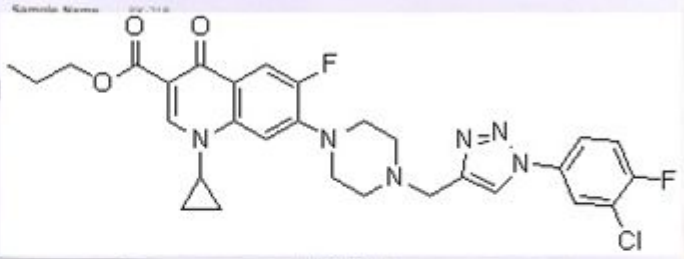

**Compound Table**

| Compound Label                                                                                     | RT    | Mass    | Formula                                                                                     | MFG Formula                                                                                 | MFG Diff (ppm) | DB Formula                                                                                  |
|----------------------------------------------------------------------------------------------------|-------|---------|---------------------------------------------------------------------------------------------|---------------------------------------------------------------------------------------------|----------------|---------------------------------------------------------------------------------------------|
| Cpd 1: C <sub>29</sub> H <sub>29</sub> O <sub>3</sub> F <sub>2</sub> N <sub>6</sub> O <sub>3</sub> | 0.095 | 583.196 | C <sub>29</sub> H <sub>29</sub> O <sub>3</sub> F <sub>2</sub> N <sub>6</sub> O <sub>3</sub> | C <sub>29</sub> H <sub>29</sub> O <sub>3</sub> F <sub>2</sub> N <sub>6</sub> O <sub>3</sub> | -6.33          | C <sub>29</sub> H <sub>29</sub> O <sub>3</sub> F <sub>2</sub> N <sub>6</sub> O <sub>3</sub> |

| Compound Label                                                                                     | m/z      | RT    | Algorithm                 | Mass    |
|----------------------------------------------------------------------------------------------------|----------|-------|---------------------------|---------|
| Cpd 1: C <sub>29</sub> H <sub>29</sub> O <sub>3</sub> F <sub>2</sub> N <sub>6</sub> O <sub>3</sub> | 583.2034 | 0.095 | Find by Molecular Feature | 583.196 |

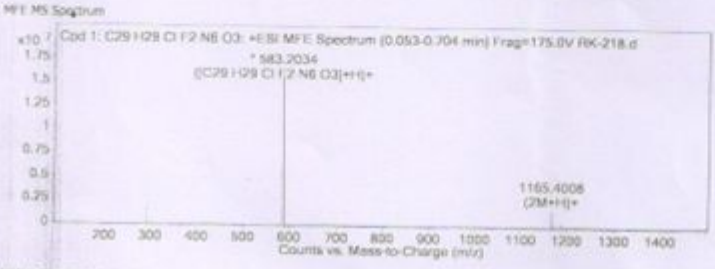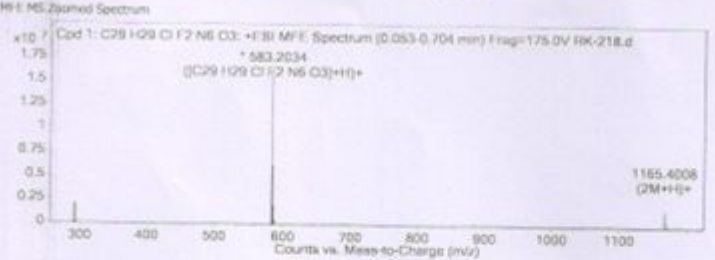

**MS Spectrum Peak List**

| m/z       | z | Abund      | Formula                                                                                     | Ion                  |
|-----------|---|------------|---------------------------------------------------------------------------------------------|----------------------|
| 202.1055  | 2 | 193015.38  | C <sub>9</sub> H <sub>9</sub> O <sub>3</sub> F <sub>2</sub> N <sub>6</sub> O <sub>3</sub>   | (M+2H) <sup>2+</sup> |
| 293.1048  | 2 | 75482.32   | C <sub>9</sub> H <sub>9</sub> O <sub>3</sub> F <sub>2</sub> N <sub>6</sub> O <sub>3</sub>   | (M+2H) <sup>2+</sup> |
| 583.2034  | 1 | 1588707    | C <sub>29</sub> H <sub>29</sub> O <sub>3</sub> F <sub>2</sub> N <sub>6</sub> O <sub>3</sub> | (M+H) <sup>+</sup>   |
| 585.2067  | 1 | 5388134.93 | C <sub>29</sub> H <sub>29</sub> O <sub>3</sub> F <sub>2</sub> N <sub>6</sub> O <sub>3</sub> | (M+H) <sup>+</sup>   |
| 585.2014  | 1 | 604468.87  | C <sub>29</sub> H <sub>29</sub> O <sub>3</sub> F <sub>2</sub> N <sub>6</sub> O <sub>3</sub> | (M+H) <sup>+</sup>   |
| 586.2038  | 1 | 1939405.09 | C <sub>29</sub> H <sub>29</sub> O <sub>3</sub> F <sub>2</sub> N <sub>6</sub> O <sub>3</sub> | (M+H) <sup>+</sup>   |
| 1165.4008 | 1 | 178899     |                                                                                             | (2M+H) <sup>+</sup>  |
| 1166.4042 | 1 | 1230669.27 |                                                                                             | (2M+H) <sup>+</sup>  |
| 1167.4003 | 1 | 158146.18  |                                                                                             | (2M+H) <sup>+</sup>  |
| 1168.402  | 1 | 901856.32  |                                                                                             | (2M+H) <sup>+</sup>  |

End Of Report

$^1\text{H}$ NMR (400MHz,  $\text{CDCl}_3$ ) (4m):

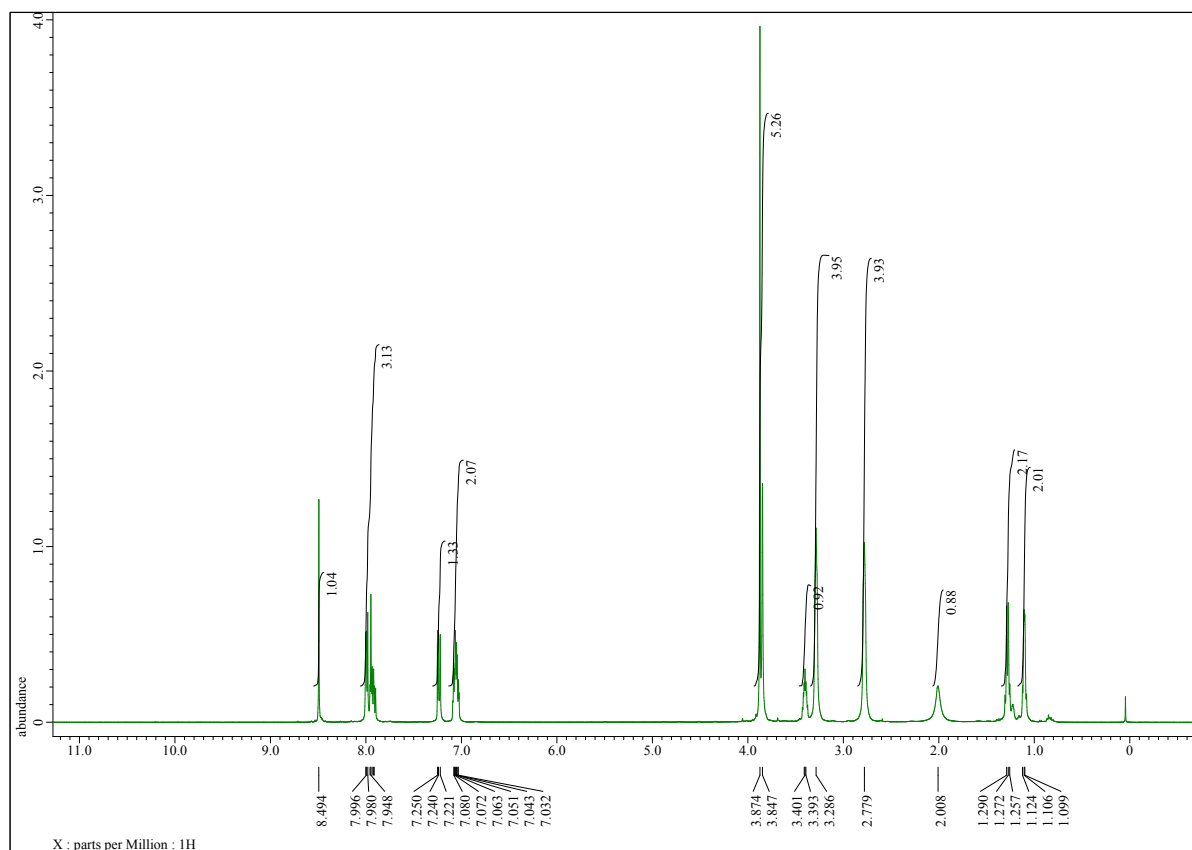

$^{13}\text{C}$ NMR (100MHz,  $\text{CDCl}_3$ ) (4m):

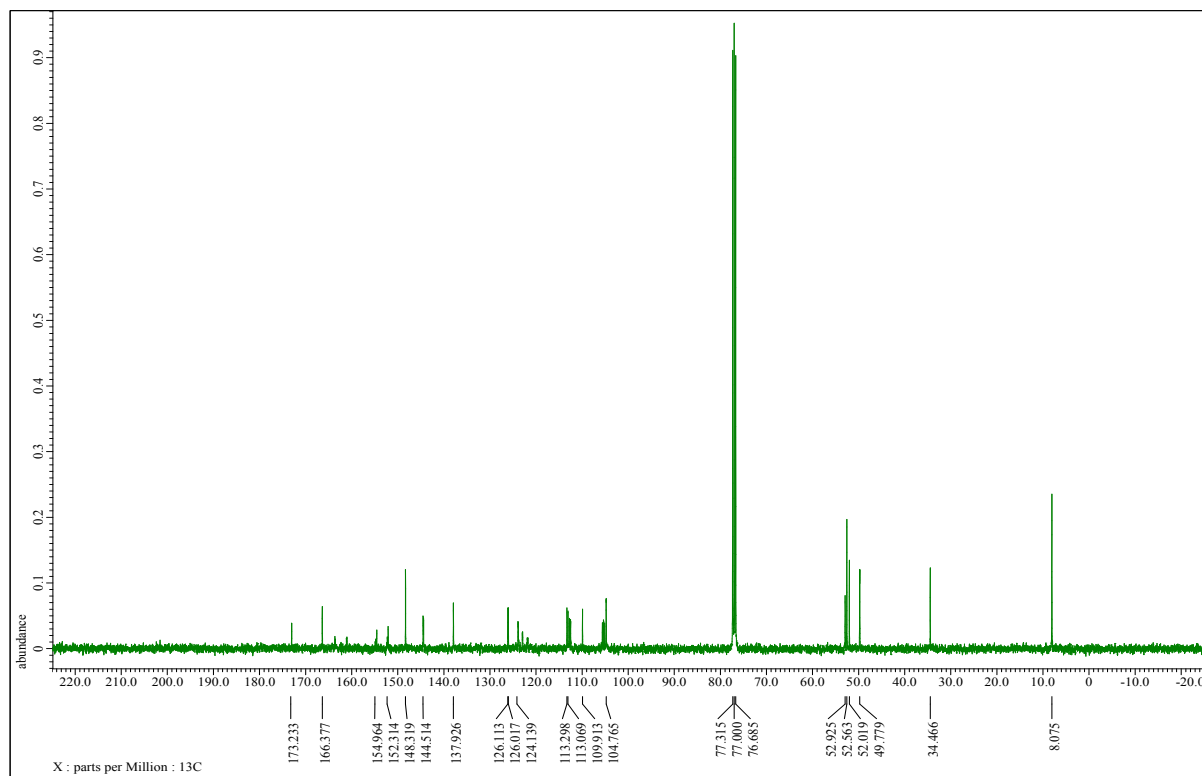

### Qualitative Compound Report

Data File: RK-219.d  
 Sample Type: Sample  
 Instrument Name: Instrument 1  
 Acq Method: Demo\_KJ.m  
 IRM Calibration Status: Success  
 Comment:  
 Sample Group:  
 Acquisition SW: 6700 series TOF/6500 series  
 Version: Q-TOF B.05.01 (85125.1)

Sample Name: RK-219  
 Posi:  
 Use:  
 Acq: DA1

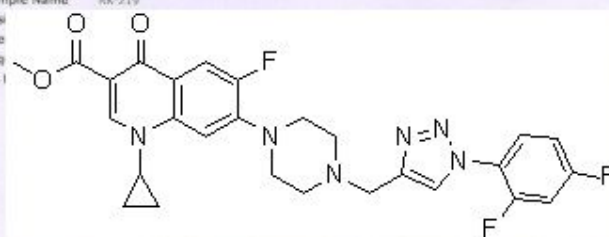

**Compound Table**

| Compound Label          | RT    | Mass     | Formula          | MFG Formula      | MFG Diff (ppm) | DB Formula       |
|-------------------------|-------|----------|------------------|------------------|----------------|------------------|
| Cpd 1: C27 H25 F3 N6 O3 | 0.099 | 538.1946 | C27 H25 F3 N6 O3 | C27 H25 F3 N6 O3 | -1             | C27 H25 F3 N6 O3 |

| Compound Label          | m/z      | RT    | Algorithm                 | Mass     |
|-------------------------|----------|-------|---------------------------|----------|
| Cpd 1: C27 H25 F3 N6 O3 | 539.2016 | 0.099 | Find by Molecular Feature | 538.1946 |

**MFE MS Spectrum**

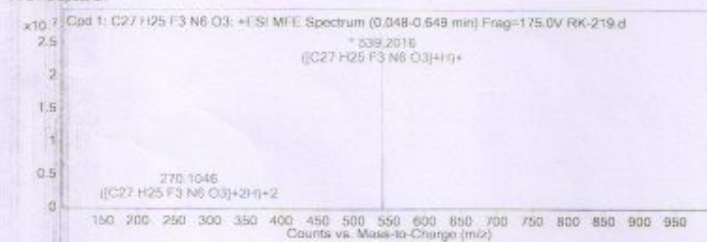

**MFE MS Zoomed Spectrum**

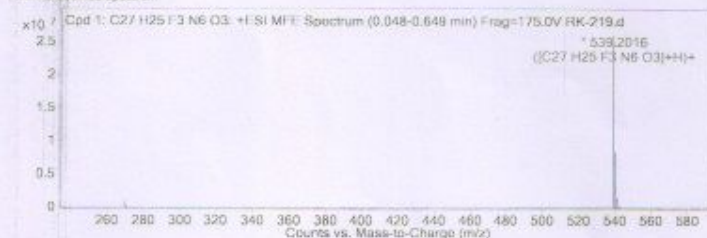

**MS Spectrum Peak List**

| m/z      | z | Abund      | Formula          | Ion      |
|----------|---|------------|------------------|----------|
| 270.1046 | 2 | 892223.19  | C27 H25 F3 N6 O3 | (M+2H)+2 |
| 270.606  | 2 | 286426.11  | C27 H25 F3 N6 O3 | (M+2H)+2 |
| 271.107  | 2 | 51835.87   | C27 H25 F3 N6 O3 | (M+2H)+2 |
| 539.2016 | 1 | 2623386.7  | C27 H25 F3 N6 O3 | (M+H)+   |
| 540.2046 | 1 | 8222952.92 | C27 H25 F3 N6 O3 | (M+H)+   |
| 541.206  | 1 | 1558801.49 | C27 H25 F3 N6 O3 | (M+H)+   |
| 542.2059 | 1 | 207852.91  | C27 H25 F3 N6 O3 | (M+H)+   |
| 543.2024 | 1 | 27768.11   | C27 H25 F3 N6 O3 | (M+H)+   |
| 558.1781 | 2 | 20974.9    |                  | (2M+H)+2 |
| 558.6769 | 2 | 8405.48    |                  | (2M+H)+2 |

— End Of Report —

$^1\text{H}$ NMR (400MHz,  $\text{CDCl}_3$ ) (4n):

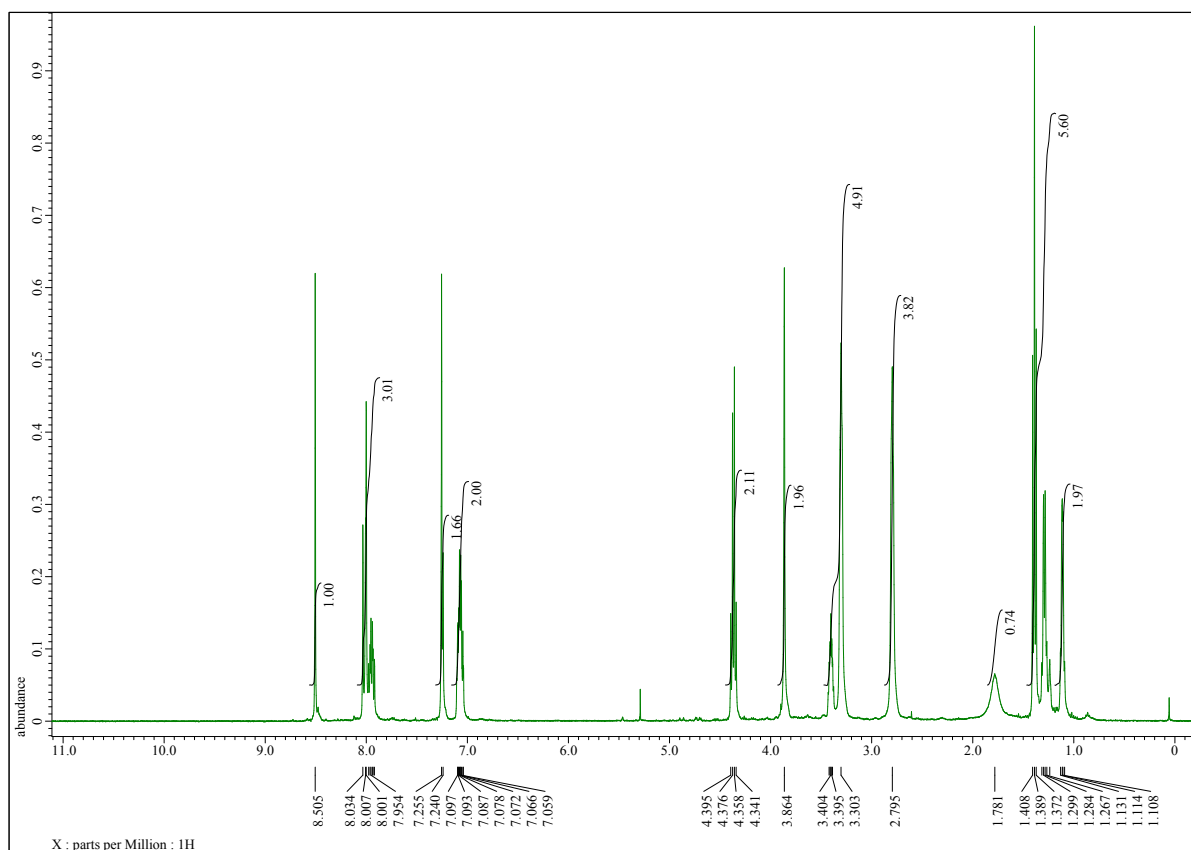

$^{13}\text{C}$ NMR (100MHz,  $\text{CDCl}_3$ ) (4n):

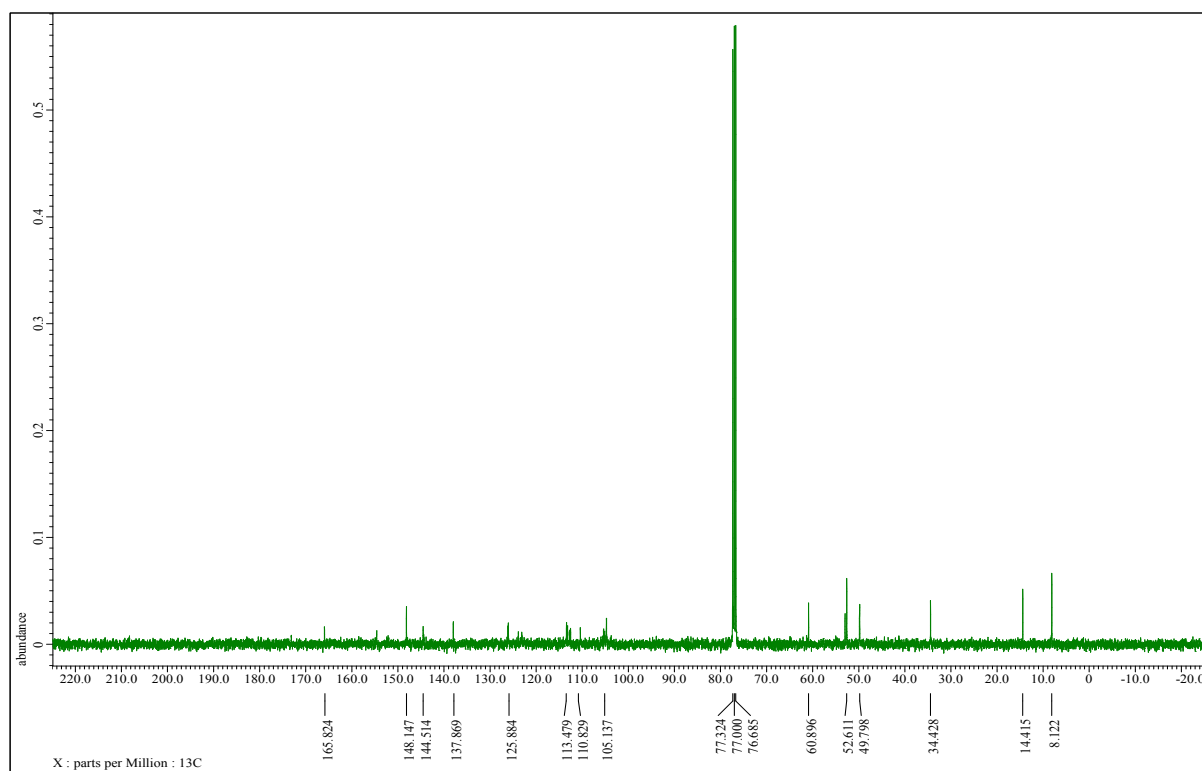

### Qualitative Compound Report

---

**Data File** RK-220.d  
**Sample Type** Sample  
**Instrument Name** Instrument 1  
**Acq Method** Demo 1K.m  
**IRM Calibration Status** Success  
**Comment**

**Sample Group**  
**Acquisition SW Version** 6200 series TOF/6500 series  
 Q-ToF B.05.01 (B0125.1)

**Sample Name** RK-220  
**Position** P1-B4  
**User Name** A

**Info.**

---

**Compound Table**

| Compound Label          | RT    | Mass     | Formula          | MFG Formula      | MFG Diff (ppm) | DB Formula       |
|-------------------------|-------|----------|------------------|------------------|----------------|------------------|
| Cpd 1: C28 H27 F3 N6 O3 | 0.125 | 552.2078 | C28 H27 F3 N6 O3 | C28 H27 F3 N6 O3 | 3.47           | C28 H27 F3 N6 O3 |

---

| Compound Label          | m/z      | RT    | Algorithm                 | Mass     |
|-------------------------|----------|-------|---------------------------|----------|
| Cpd 1: C28 H27 F3 N6 O3 | 553.2148 | 0.125 | Find by Molecular Feature | 552.2078 |

**M/E MS Spectrum**

**M/E MS Zoomed Spectrum**

**MS Spectrum Peak List**

| m/z      | z | Abund      | Formula          | Ion       |
|----------|---|------------|------------------|-----------|
| 277.1112 | 2 | 171323.13  | C28 H27 F3 N6 O3 | (M-2H)+2  |
| 277.6126 | 2 | 560932.19  | C28 H27 F3 N6 O3 | (M+2H)+2  |
| 278.0136 | 2 | 102557.43  | C28 H27 F3 N6 O3 | (M+2H)+2  |
| 278.0152 | 2 | 13367.27   | C28 H27 F3 N6 O3 | (M+2H)+2  |
| 553.2148 | 1 | 23112674   | C28 H27 F3 N6 O3 | (M+H)+    |
| 554.2181 | 1 | 7494198.64 | C28 H27 F3 N6 O3 | (M+H)+    |
| 555.2181 | 1 | 1550787.26 | C28 H27 F3 N6 O3 | (M+H)+    |
| 556.2156 | 1 | 237181.26  | C28 H27 F3 N6 O3 | (M+H)+    |
| 557.212  | 1 | 29177.97   | C28 H27 F3 N6 O3 | (M+H)+    |
| 578.1933 | 2 | 25143.11   | C28 H27 F3 N6 O3 | (2M+1H)+2 |

— End Of Report —

---

Agilent Technologies
Page 1 of 1
Printed at: 17:08 on:05-09-2018

$^1\text{H}$ NMR (400MHz,  $\text{CDCl}_3$ ) (4o):

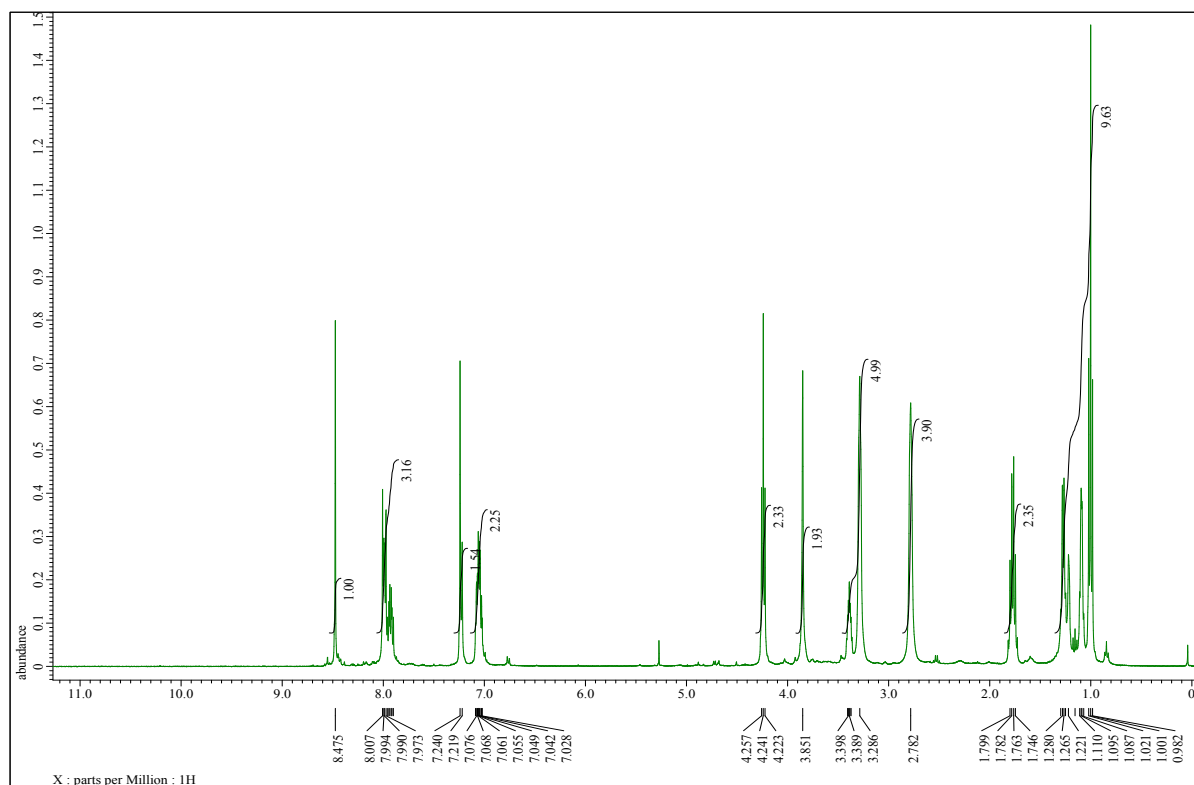

$^{13}\text{C}$ NMR (100MHz,  $\text{CDCl}_3$ ) (4o):

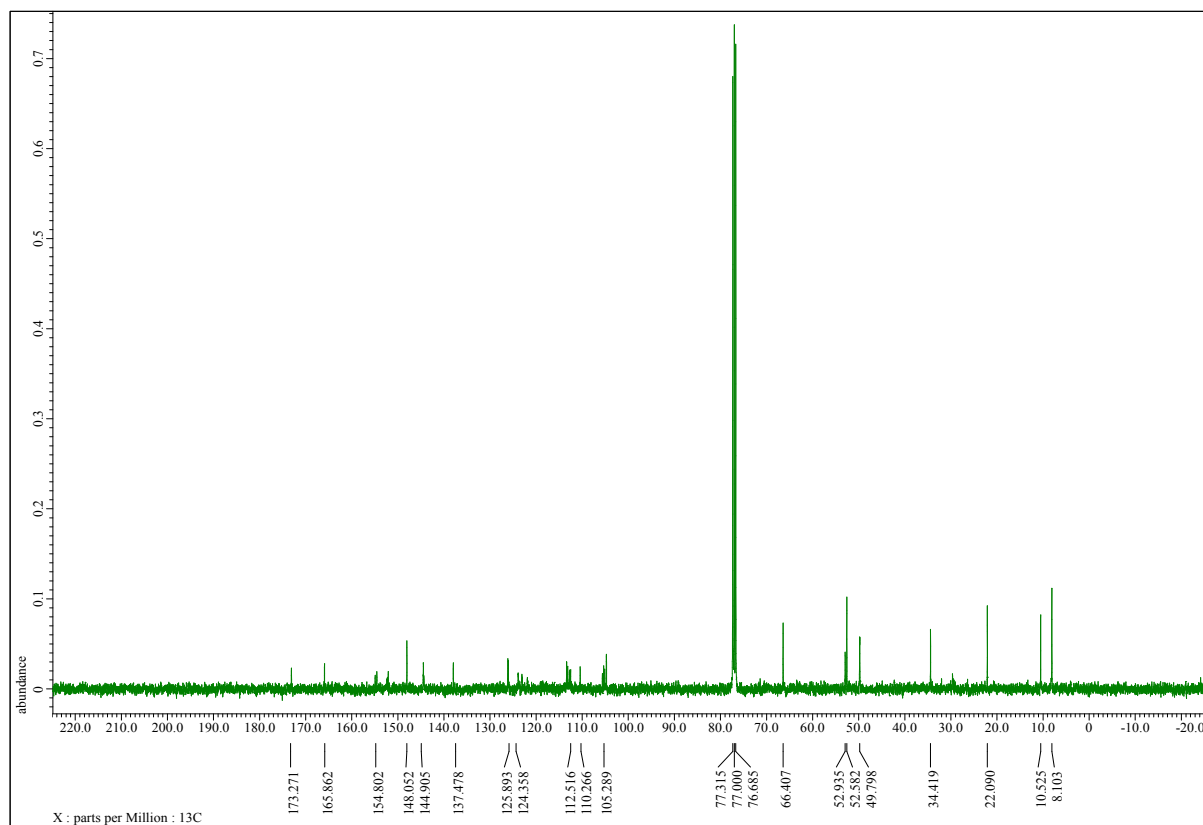

### Qualitative Compound Report

Data File: RK-221.d  
 Sample Type: Sample  
 Instrument Name: Instrument 1  
 Acq Method: Comp. ILCM  
 IRM Calibration Status: Success  
 Comment:  
 Sample Group:  
 Acquisition SW: 6200 series TOF/6300 series  
 Version: Q-TOF B.05.01 (08125.1)

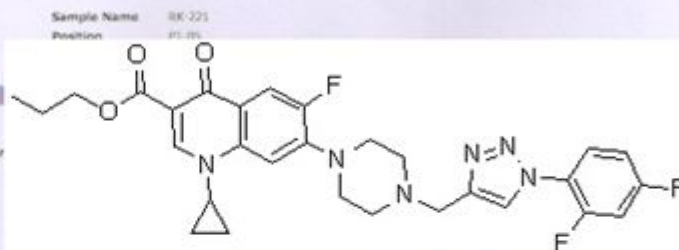

Compound Table

| Compound Label          | RT    | Mass     | Formula          | MFG Formula      | MFG Diff (ppm) | DB Formula       |
|-------------------------|-------|----------|------------------|------------------|----------------|------------------|
| Cap 1: C29 H29 F3 N6 O3 | 0.123 | 566.2239 | C29 H29 F3 N6 O3 | C29 H29 F3 N6 O3 | 2.43           | C29 H29 F3 N6 O3 |

| Compound Label          | m/z      | RT    | Algorithm                           | Mass |
|-------------------------|----------|-------|-------------------------------------|------|
| Cap 1: C29 H29 F3 N6 O3 | 567.2311 | 0.123 | Find by Molecular Feature: 566.2239 |      |

MFE MS Spectrum

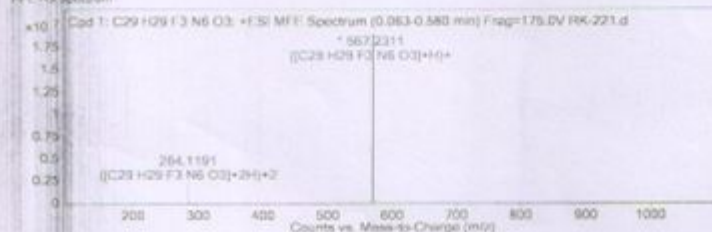

MFE MS Zoomed Spectrum

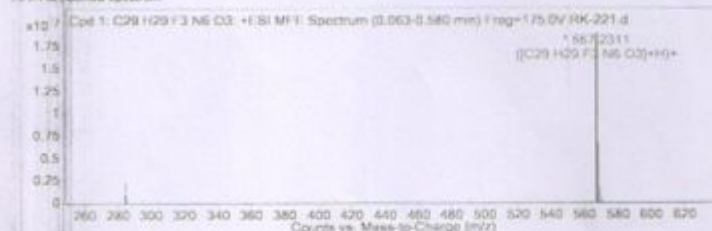

MS Spectrum Peak List

| m/z      | z | Abund      | Formula          | Ion      |
|----------|---|------------|------------------|----------|
| 264.1191 | 2 | 21881.72.5 | C29 H29 F3 N6 O3 | (M+2H)+2 |
| 284.6208 | 2 | 797136.35  | C29 H29 F3 N6 O3 | (M+2H)+2 |
| 285.1216 | 2 | 148385.06  | C29 H29 F3 N6 O3 | (M+2H)+2 |
| 295.3302 | 2 | 58504.63   | C29 H29 F3 N6 O3 | (M+2H)+2 |
| 295.6117 | 2 | 20834.4    | C29 H29 F3 N6 O3 | (M+2H)+2 |
| 567.2311 | 1 | 18881684   | C29 H29 F3 N6 O3 | (M+H)+   |
| 568.2341 | 1 | 6286122.62 | C29 H29 F3 N6 O3 | (M+H)+   |
| 569.2290 | 1 | 1712819.02 | C29 H29 F3 N6 O3 | (M+H)+   |
| 570.2242 | 1 | 35260.97   | C29 H29 F3 N6 O3 | (M+H)+   |
| 571.2202 | 1 | 57262.22   | C29 H29 F3 N6 O3 | (M+H)+   |

— End Of Report —

$^1\text{H}$ NMR (400MHz,  $\text{CDCl}_3$ ) (4p):

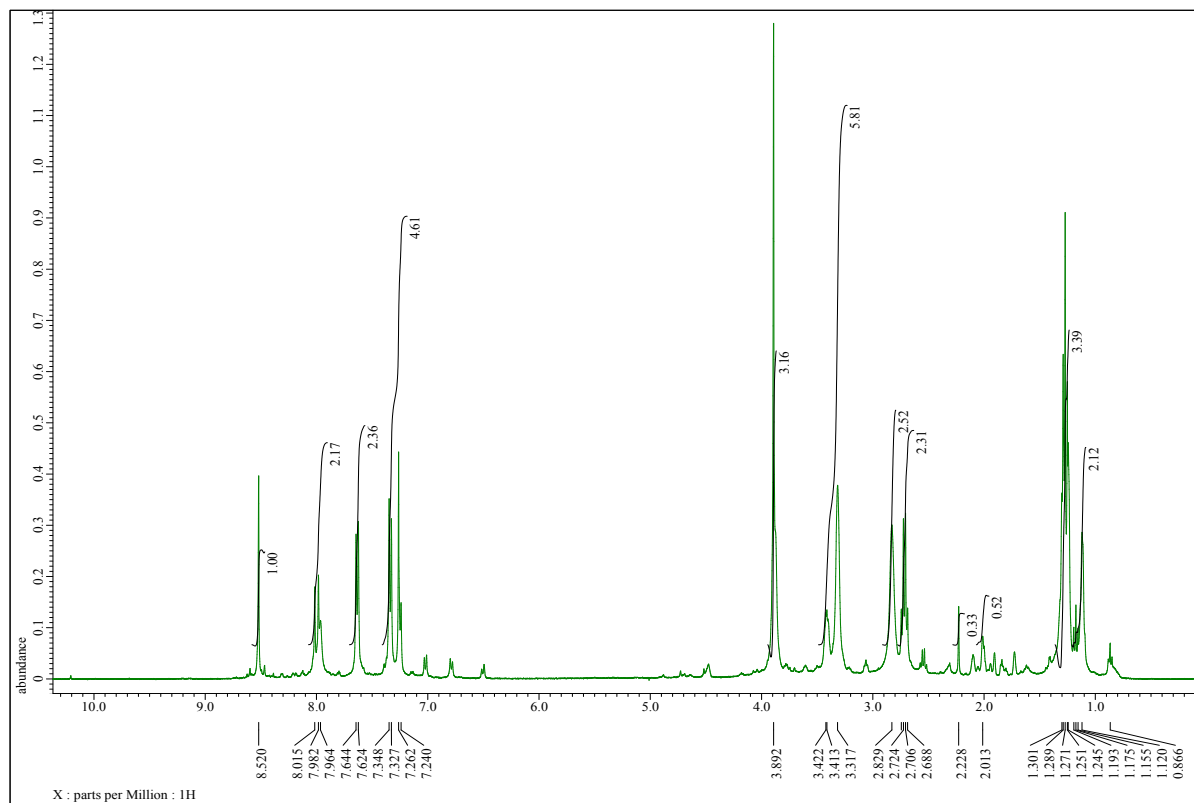

$^{13}\text{C}$ NMR (100MHz,  $\text{CDCl}_3$ ) (4p):

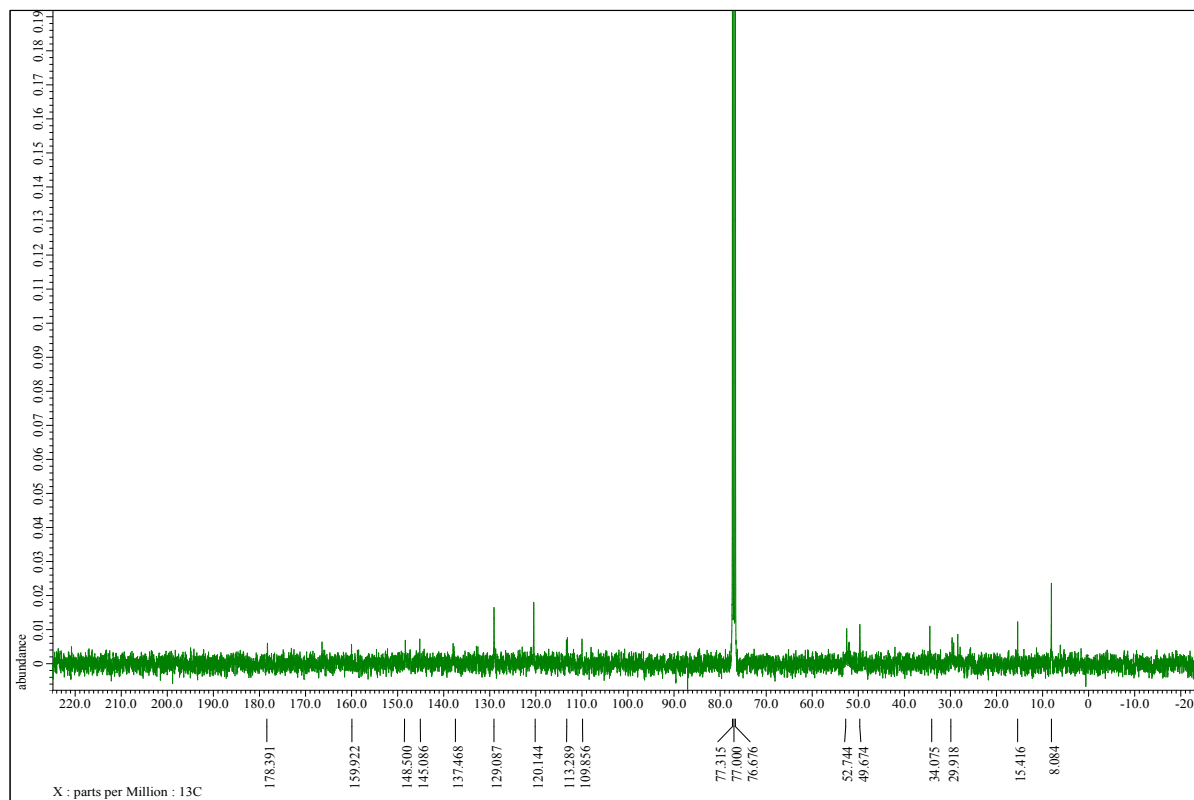



### Qualitative Compound Report

Data File: RK-222.d  
 Sample Type: Sample  
 Instrument Name: Instrument 1  
 Acq Method: Data\_XC.m  
 IRM Calibration Status: **Sustone**  
 Comment:

Sample Name: RK-222  
 Position: P1-06  
 Use:   
 Acq: DA

Sample Group:   
 Acquisition SW: 6300 series TQF/6500 series  
 Version: Q-TOF R.05.01 (06125.1)

Info.

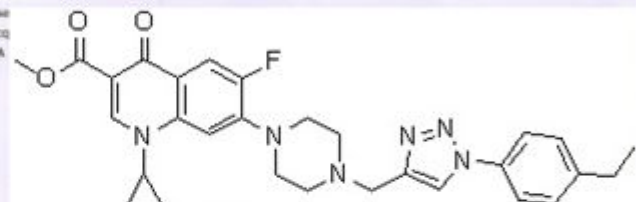

**Compound Table**

| Compound Label         | RT    | Mass     | Formula         | MFG Formula     | MFG Diff (ppm) | DB Formula      |
|------------------------|-------|----------|-----------------|-----------------|----------------|-----------------|
| Cpd 3: C29 H31 F N6 O3 | 0.132 | 530.2429 | C29 H31 F N6 O3 | C29 H31 F N6 O3 | 2.43           | C29 H31 F N6 O3 |

| Compound Label         | m/z      | RT    | Algorithm                 | Mass     |
|------------------------|----------|-------|---------------------------|----------|
| Cpd 3: C29 H31 F N6 O3 | 531.2499 | 0.132 | Find by Molecular Feature | 530.2429 |

**MFI MS Spectrum**

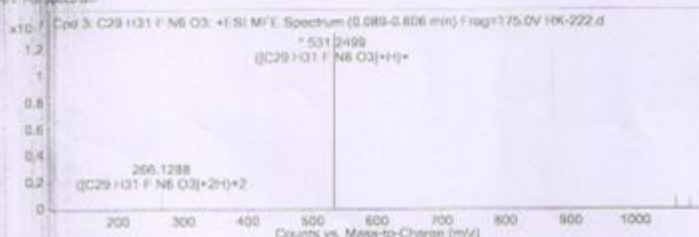

**MFI MS Zoomed Spectrum**

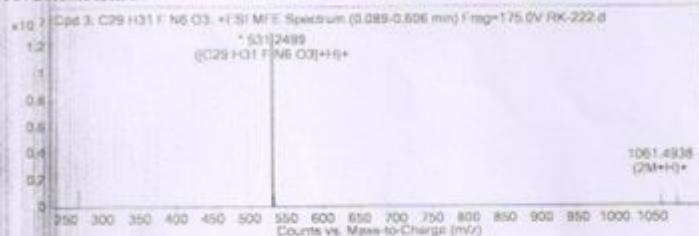

**MS Spectrum Peak List**

| m/z       | z | Abund      | Formula         | Ion      |
|-----------|---|------------|-----------------|----------|
| 266.1288  | 2 | 1230593.5  | C29 H31 F N6 O3 | (M+2H)+2 |
| 266.6301  | 2 | 400289.06  | C29 H31 F N6 O3 | (M+2H)+2 |
| 531.2499  | 1 | 1304136.7  | C29 H31 F N6 O3 | (M+H)+   |
| 532.2532  | 1 | 4662970.98 | C29 H31 F N6 O3 | (M+H)+   |
| 533.2497  | 1 | 1071134.57 | C29 H31 F N6 O3 | (M+H)+   |
| 1061.4938 | 1 | 911160.19  |                 | (2M+H)+  |
| 1062.4963 | 1 | 630822.46  |                 | (2M+H)+  |
| 1063.4984 | 1 | 218054.72  |                 | (2M+H)+  |
| 1063.4751 | 1 | 793893.75  |                 | (2M+Na)+ |
| 1064.4782 | 1 | 539913.34  |                 | (2M+Na)+ |

— End Of Report —

$^1\text{H}$ NMR (400MHz,  $\text{CDCl}_3$ ) (4q):

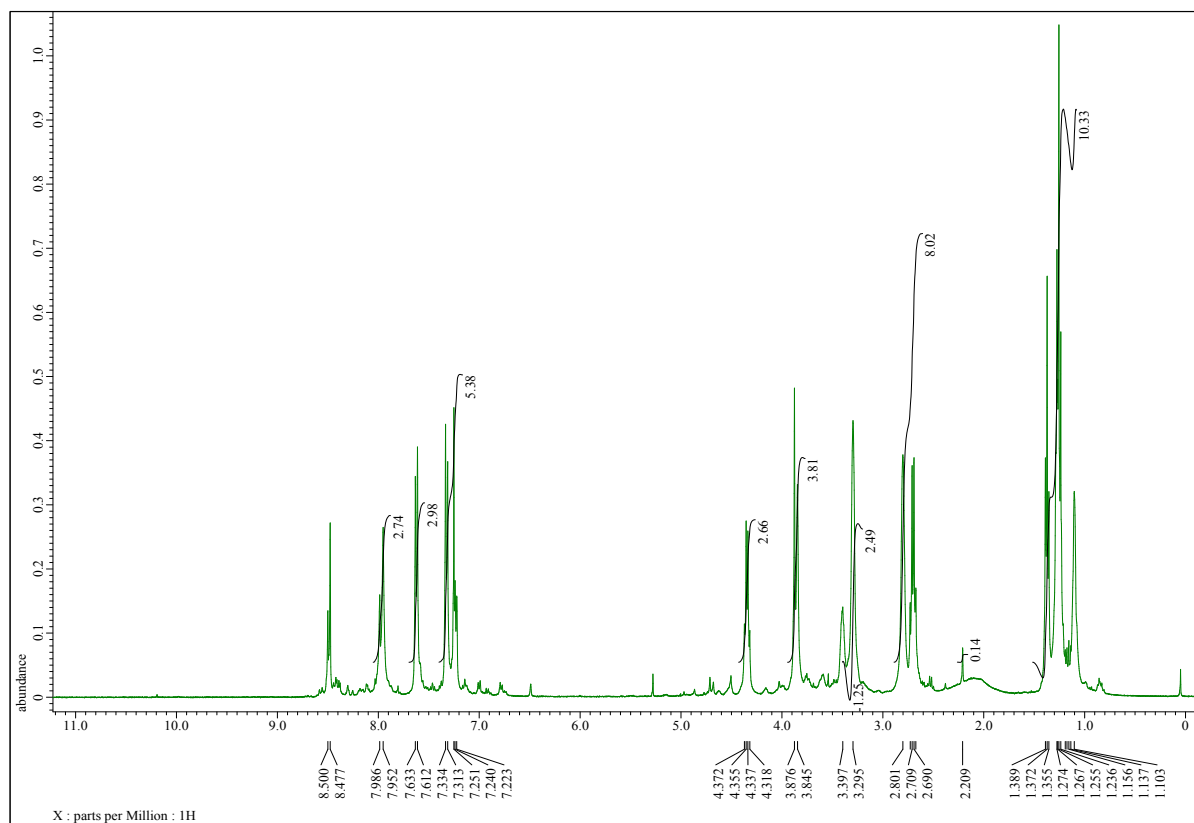

$^{13}\text{C}$ NMR (100MHz,  $\text{CDCl}_3$ ) (4q):

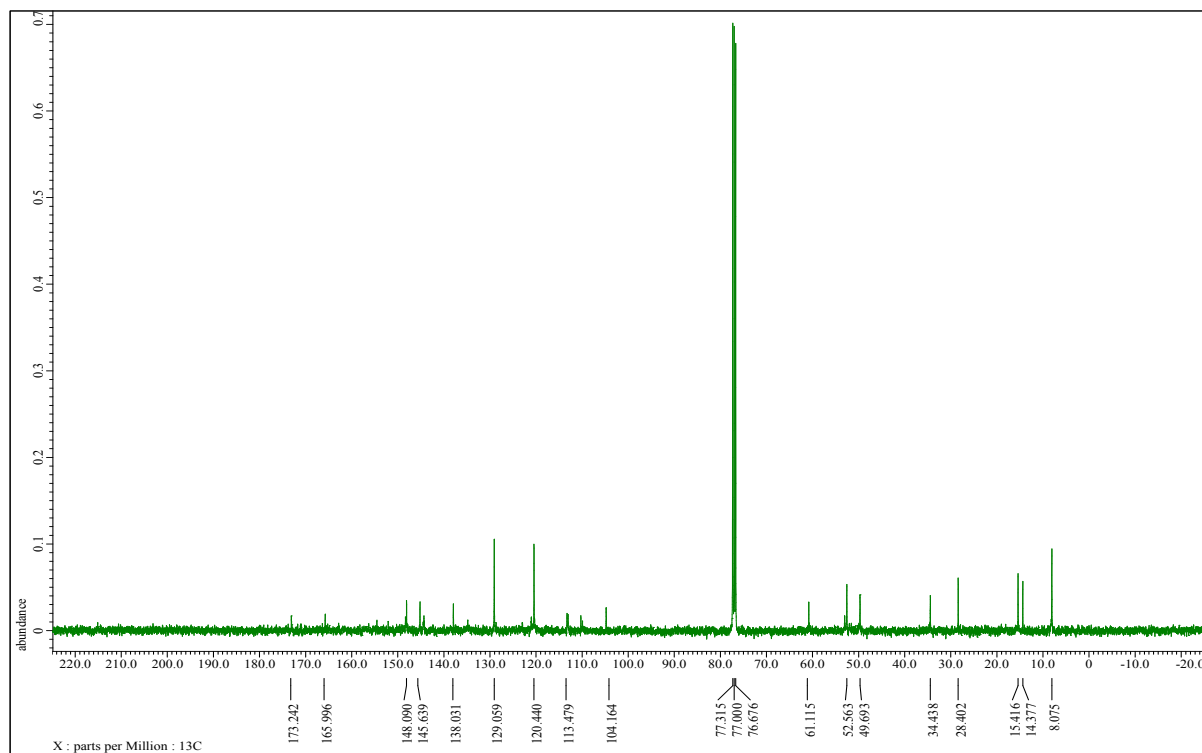

### Qualitative Compound Report

Data File: RK-223.d  
 Sample Type: Instrument 1  
 Instrument Name: Demo 3K.m  
 IRM Calibration Status: Success  
 Comment:

Sample Name: RK-223  
 Position: P1-04

Sample Group: Info.  
 Acquisition SW: 6300 series TOF/MS00 series  
 Version: Q-TOF B.05.01 (R6125.1)

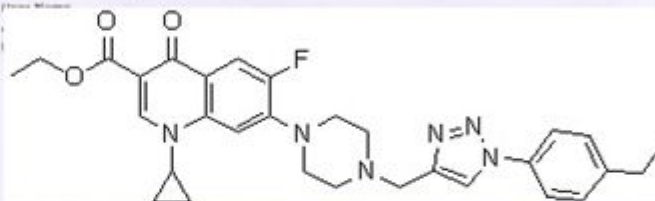

**Compound Table**

| Compound Label         | RT    | Mass     | Formula         | MFG Formula     | MFG DIFF (ppm) | DB Formula      |
|------------------------|-------|----------|-----------------|-----------------|----------------|-----------------|
| Cpd 6: C30 H33 F N6 O3 | 0.117 | 544.2585 | C30 H33 F N6 O3 | C30 H33 F N6 O3 | 2.47           | C30 H33 F N6 O3 |

| Compound Label         | m/z      | RT    | Algorithm                 | Mass     |
|------------------------|----------|-------|---------------------------|----------|
| Cpd 6: C30 H33 F N6 O3 | 545.2658 | 0.117 | Find by Molecular Feature | 544.2585 |

**MFT MS Spectrum**

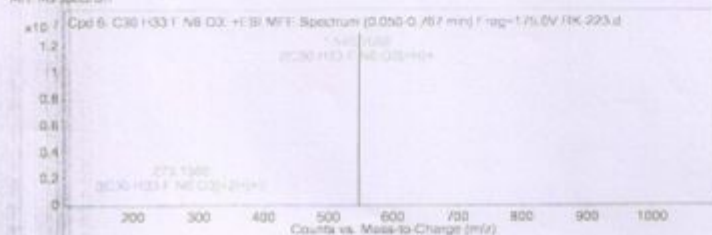

**MFI MS Zoomed Spectrum**

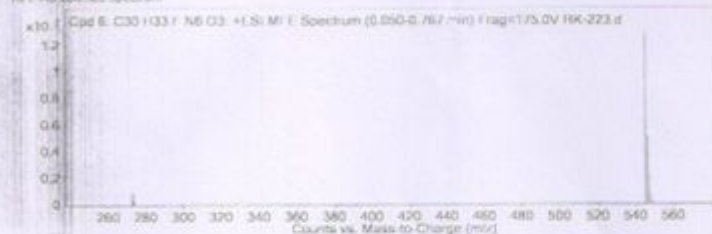

**MS Spectrum Peak List**

| m/z      | z | Abund      | Formula         | Ion      |
|----------|---|------------|-----------------|----------|
| 273.1366 | 2 | 817735.56  | C30 H33 F N6 O3 | (M+2H)+2 |
| 273.0378 | 2 | 281213.79  | C30 H33 F N6 O3 | (M+2H)+2 |
| 276.139  | 2 | 56438.3    | C30 H33 F N6 O3 | (M+2H)+2 |
| 274.6407 | 2 | 8343.39    | C30 H33 F N6 O3 | (M+2H)+2 |
| 545.2658 | 1 | 12866832   | C30 H33 F N6 O3 | (M+H)+   |
| 546.2688 | 1 | 4557393.05 | C30 H33 F N6 O3 | (M+H)+   |
| 547.265  | 1 | 2206495.5  | C30 H33 F N6 O3 | (M+H)+   |
| 548.2625 | 1 | 658963.57  | C30 H33 F N6 O3 | (M+H)+   |
| 549.2532 | 1 | 129486.85  | C30 H33 F N6 O3 | (M+H)+   |
| 550.2548 | 1 | 19097.85   | C30 H33 F N6 O3 | (M+H)+   |

--- End Of Report ---

$^1\text{H}$ NMR (400MHz,  $\text{CDCl}_3$ ) (4r):

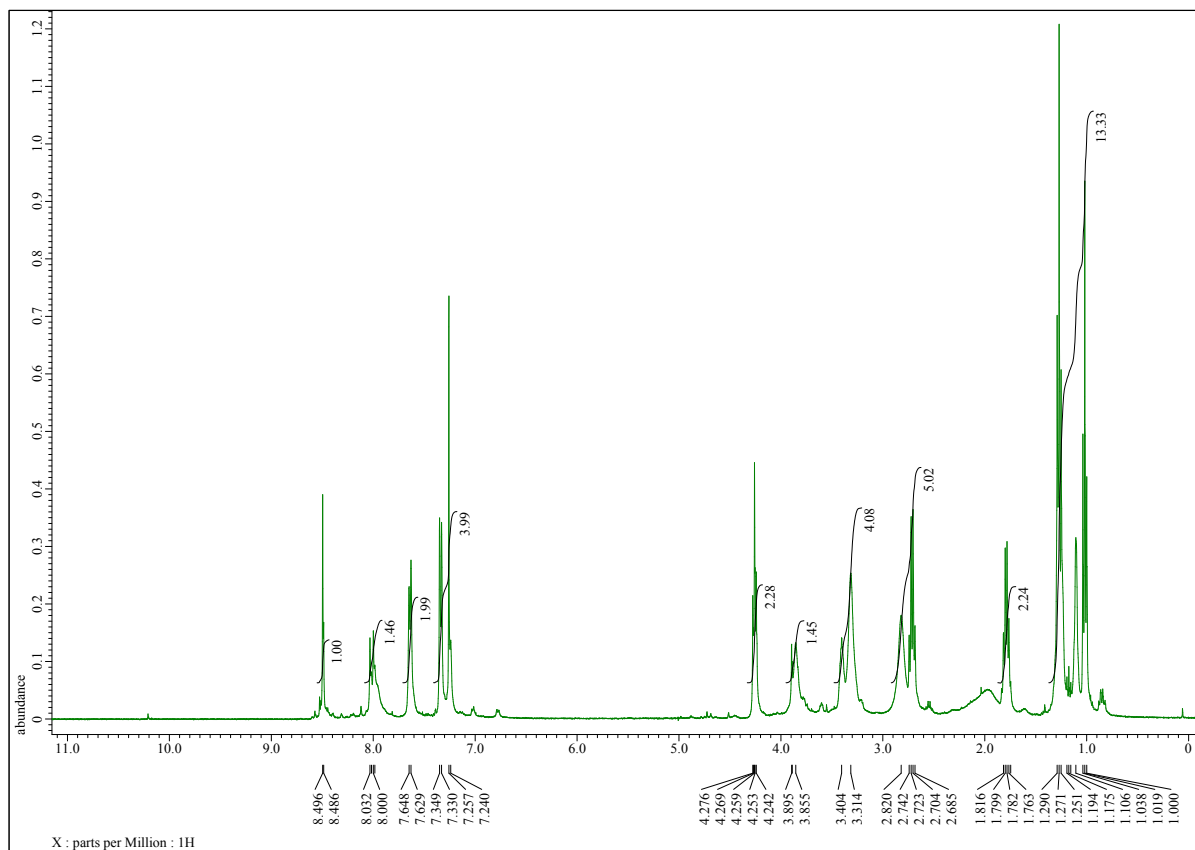

$^{13}\text{C}$ NMR (100MHz,  $\text{CDCl}_3$ ) (4r):

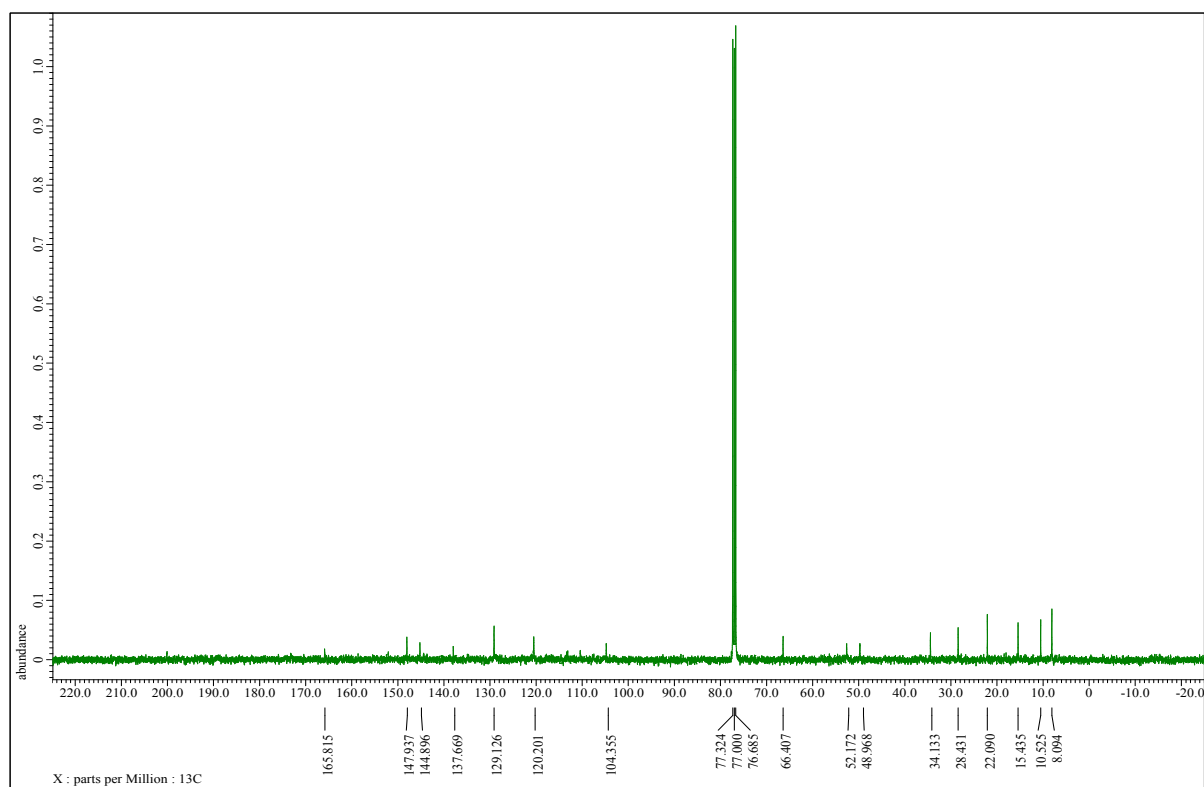

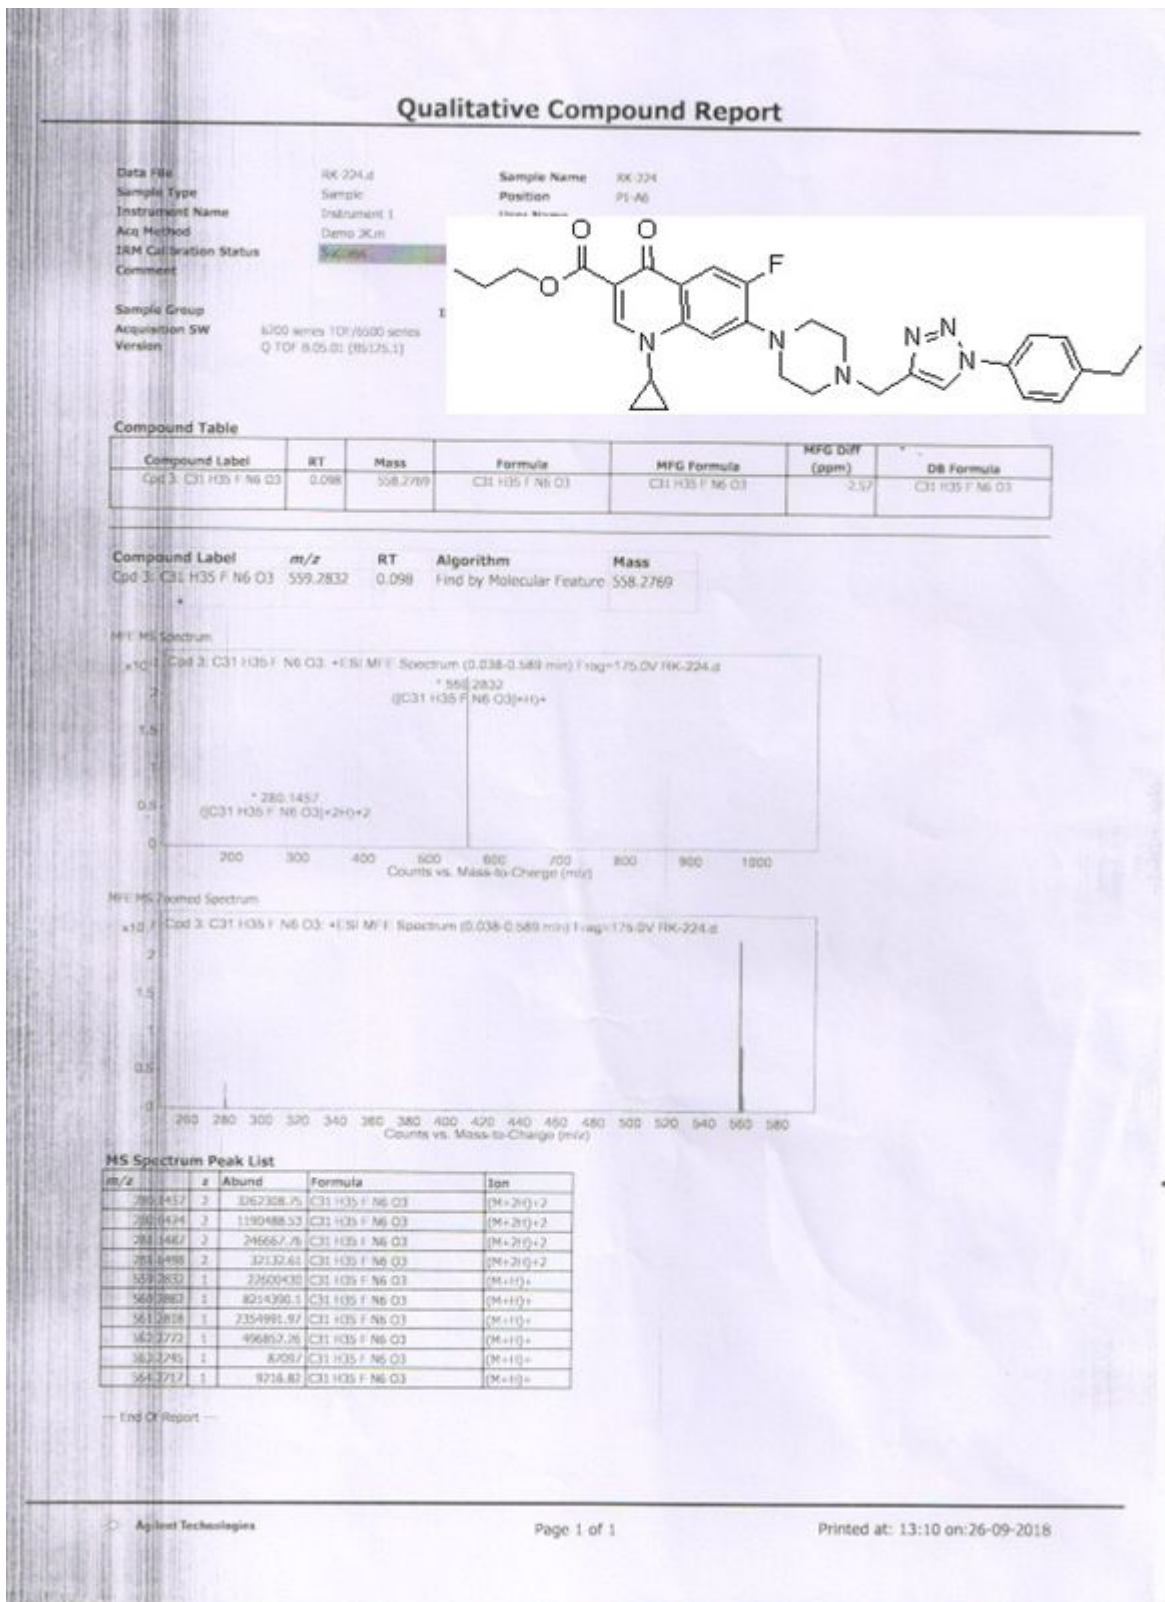

$^1\text{H}$ NMR (400MHz,  $\text{CDCl}_3$ ) (4s):

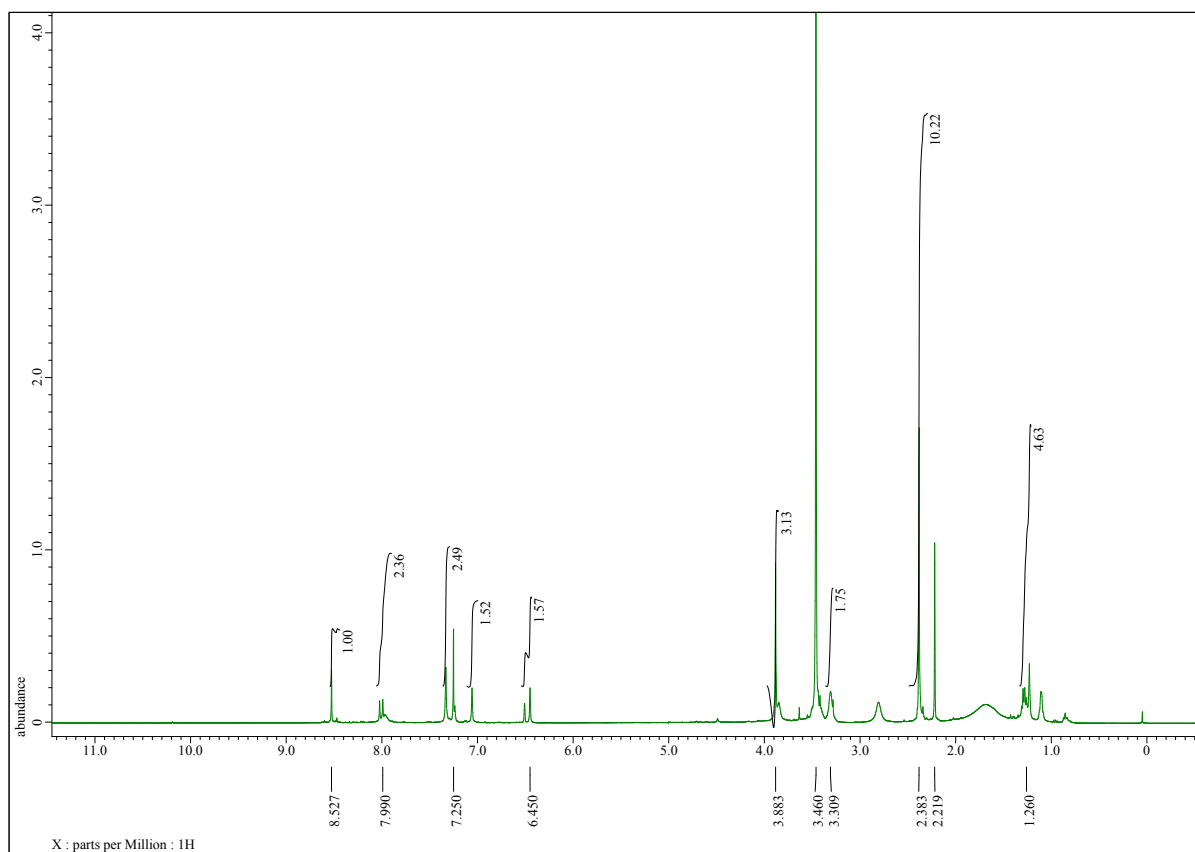

$^{13}\text{C}$ NMR (100MHz,  $\text{CDCl}_3$ ) (4s):

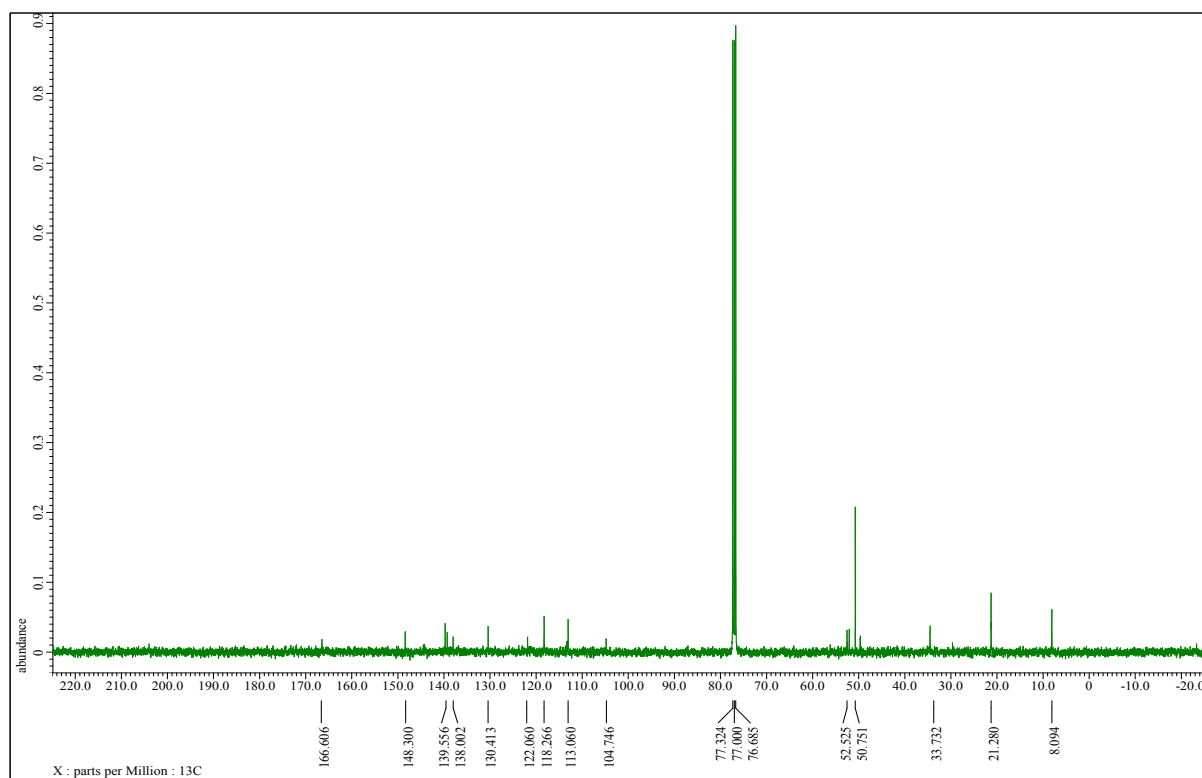

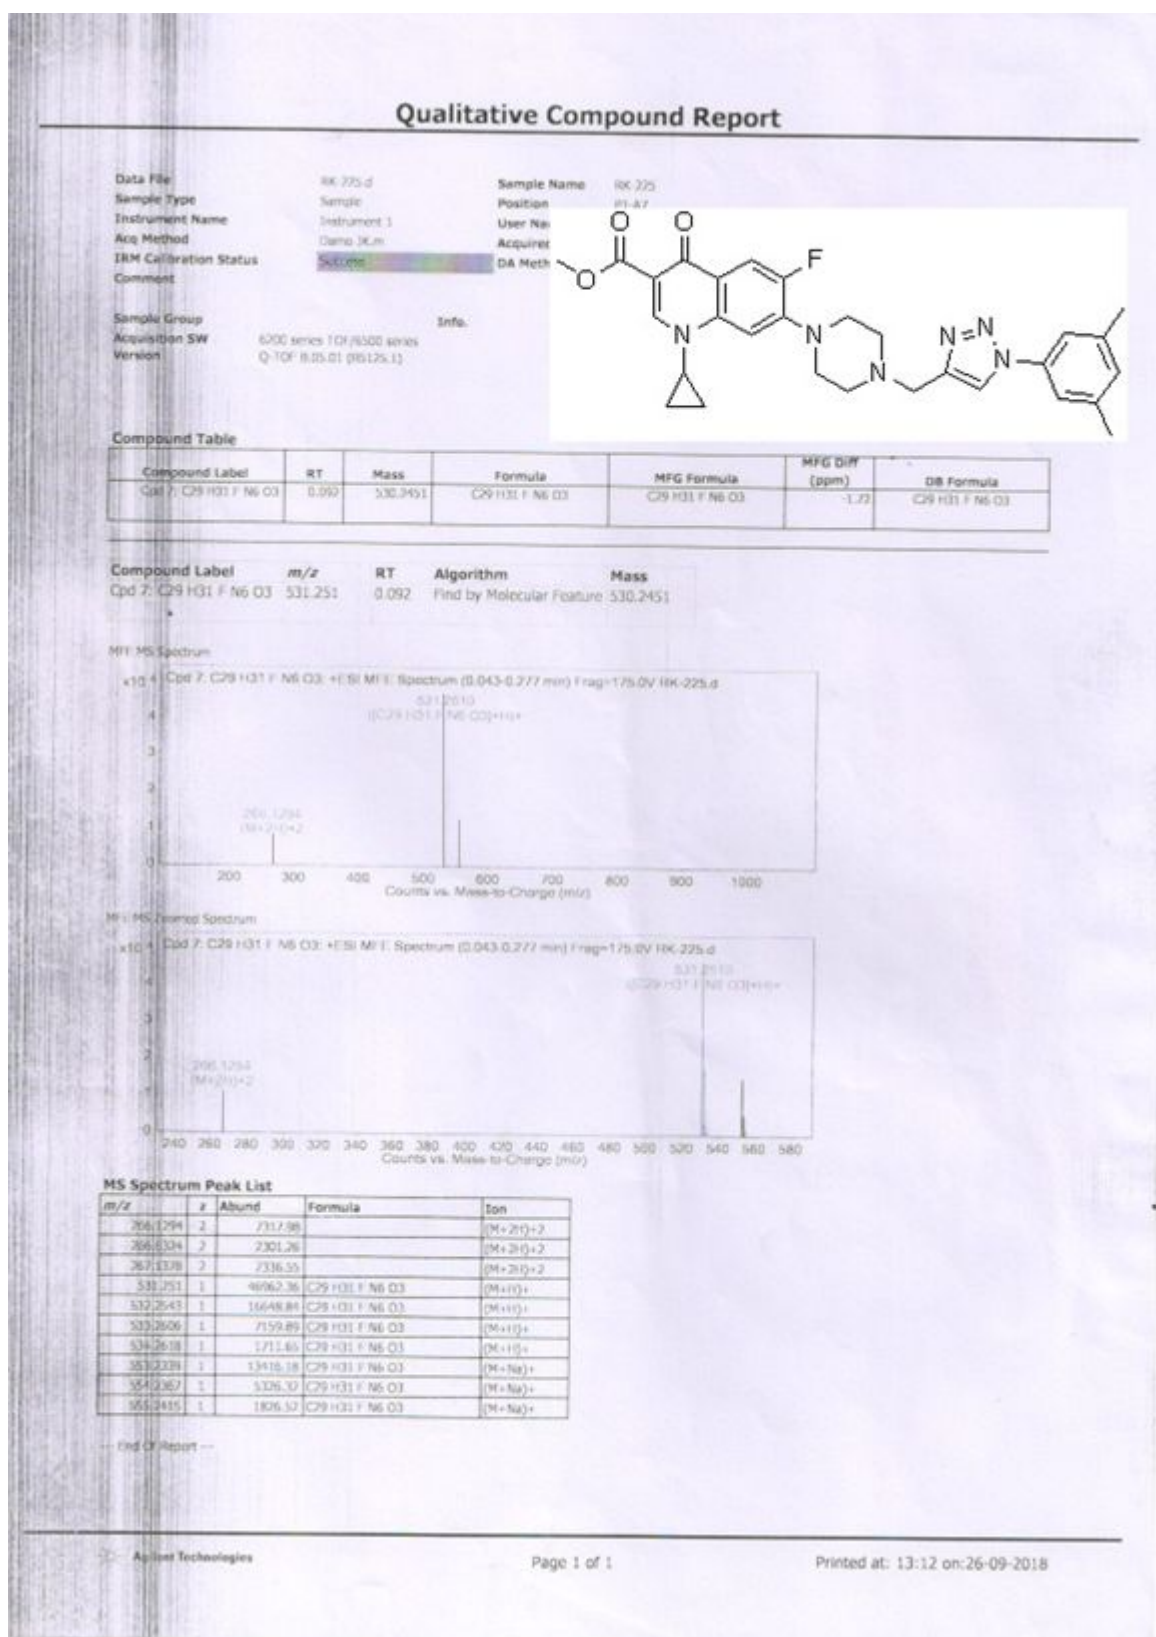

$^1\text{H}$ NMR (400MHz,  $\text{CDCl}_3$ ) (4t):

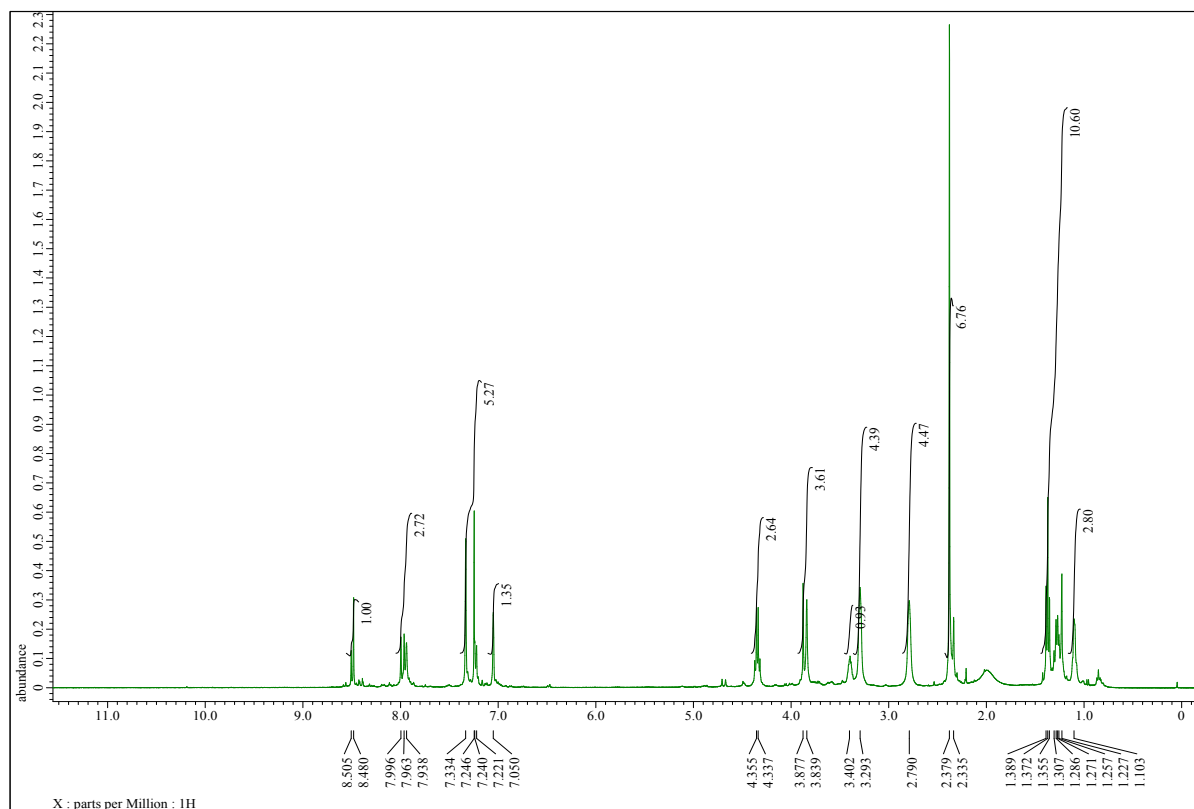

$^{13}\text{C}$ NMR (100MHz,  $\text{CDCl}_3$ ) (4t):

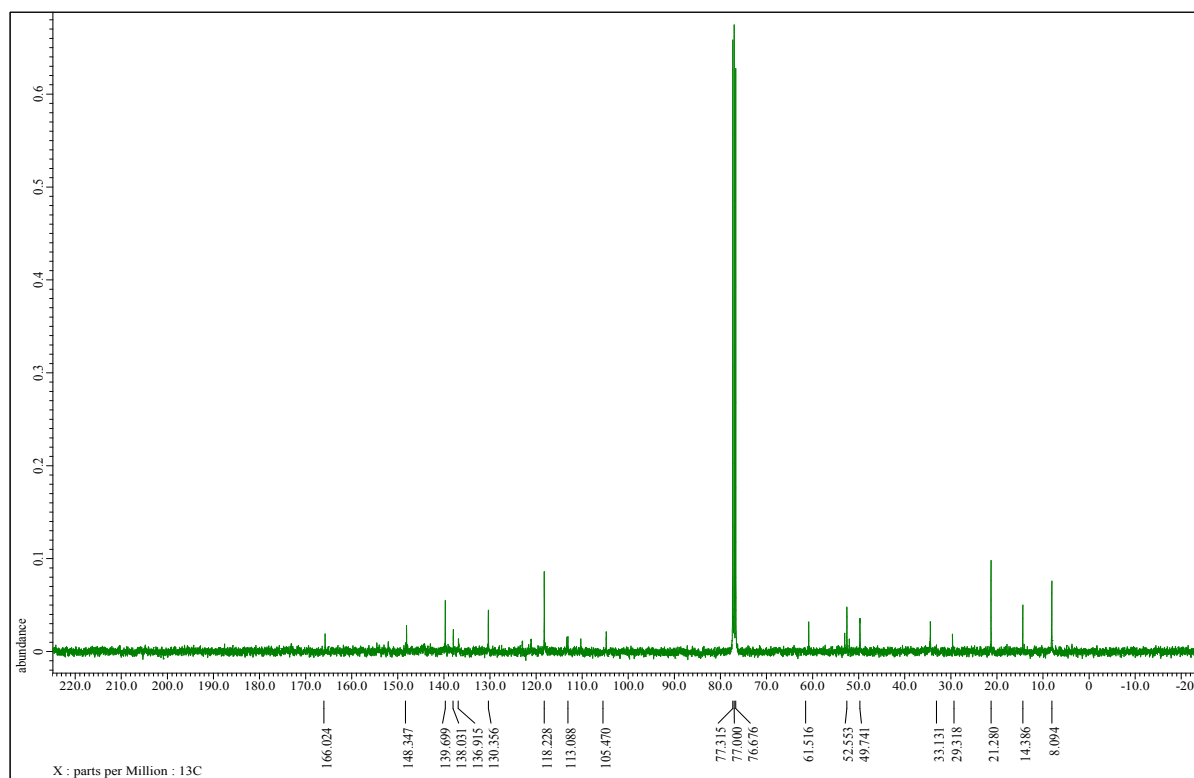



## Qualitative Compound Report

|                               |              |                    |        |
|-------------------------------|--------------|--------------------|--------|
| <b>Data File</b>              | RK-226.d     | <b>Sample Name</b> | RK-226 |
| <b>Sample Type</b>            | Sample       | <b>Position</b>    | D1_61  |
| <b>Instrument Name</b>        | Instrument 1 | <b>User Na</b>     |        |
| <b>Acq Method</b>             | Demo JK.m    | <b>Acquire</b>     |        |
| <b>IRM Calibration Status</b> | Success      | <b>DA Mett</b>     |        |
| <b>Comment</b>                |              |                    |        |

|                       |                             |              |
|-----------------------|-----------------------------|--------------|
| <b>Sample Group</b>   |                             | <b>Info.</b> |
| <b>Acquisition SW</b> | 6200 series TOF/6500 series |              |
| <b>Version</b>        | Q-TOF B.05.01 (B5125.1)     |              |

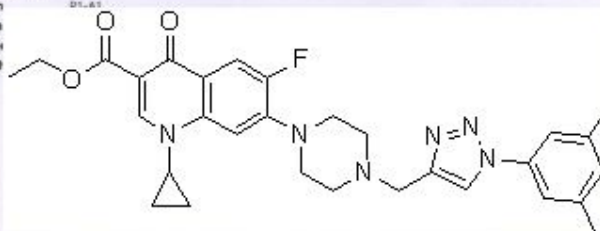

### Compound Table

| Compound Label          | RT    | Mass     | Formula         | MFG Formula     | MFG Diff (ppm) | DB Formula      |
|-------------------------|-------|----------|-----------------|-----------------|----------------|-----------------|
| Cpd 18: C30 H33 F N6 O3 | 0.109 | 544.2606 | C30 H33 F N6 O3 | C30 H33 F N6 O3 | -1.49          | C30 H33 F N6 O3 |

| Compound Label          | m/z      | RT    | Algorithm                 | Mass     |
|-------------------------|----------|-------|---------------------------|----------|
| Cpd 18: C30 H33 F N6 O3 | 545.2655 | 0.109 | Find by Molecular Feature | 544.2606 |

### MFE MS Spectrum

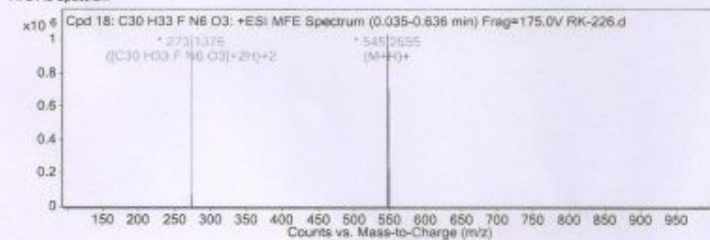

### MFE MS Zoomed Spectrum

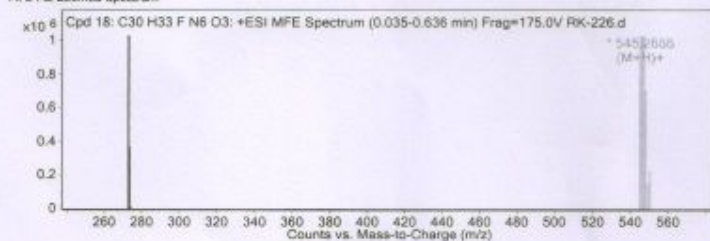

### MS Spectrum Peak List

| m/z      | z | Abund      | Formula         | Ion      |
|----------|---|------------|-----------------|----------|
| 273.1376 | 2 | 1032085.63 | C30 H33 F N6 O3 | (M+2H)+2 |
| 273.6392 | 2 | 365649.5   | C30 H33 F N6 O3 | (M+2H)+2 |
| 274.1401 | 2 | 74582.3    | C30 H33 F N6 O3 | (M+2H)+2 |
| 274.6411 | 2 | 10967.38   | C30 H33 F N6 O3 | (M+2H)+2 |
| 545.2655 | 1 | 5966244.5  |                 | (M+H)+   |
| 546.2677 | 1 | 2037548.07 |                 | (M+H)+   |
| 547.2494 | 1 | 2157937.15 |                 | (M+H)+   |
| 548.2499 | 1 | 705076.48  |                 | (M+H)+   |
| 549.2532 | 1 | 153351.73  |                 | (M+H)+   |
| 550.2508 | 1 | 227633.96  |                 | (M+H)+   |

--- End Of Report ---

$^1\text{H}$ NMR (400MHz,  $\text{CDCl}_3$ ) (4u):

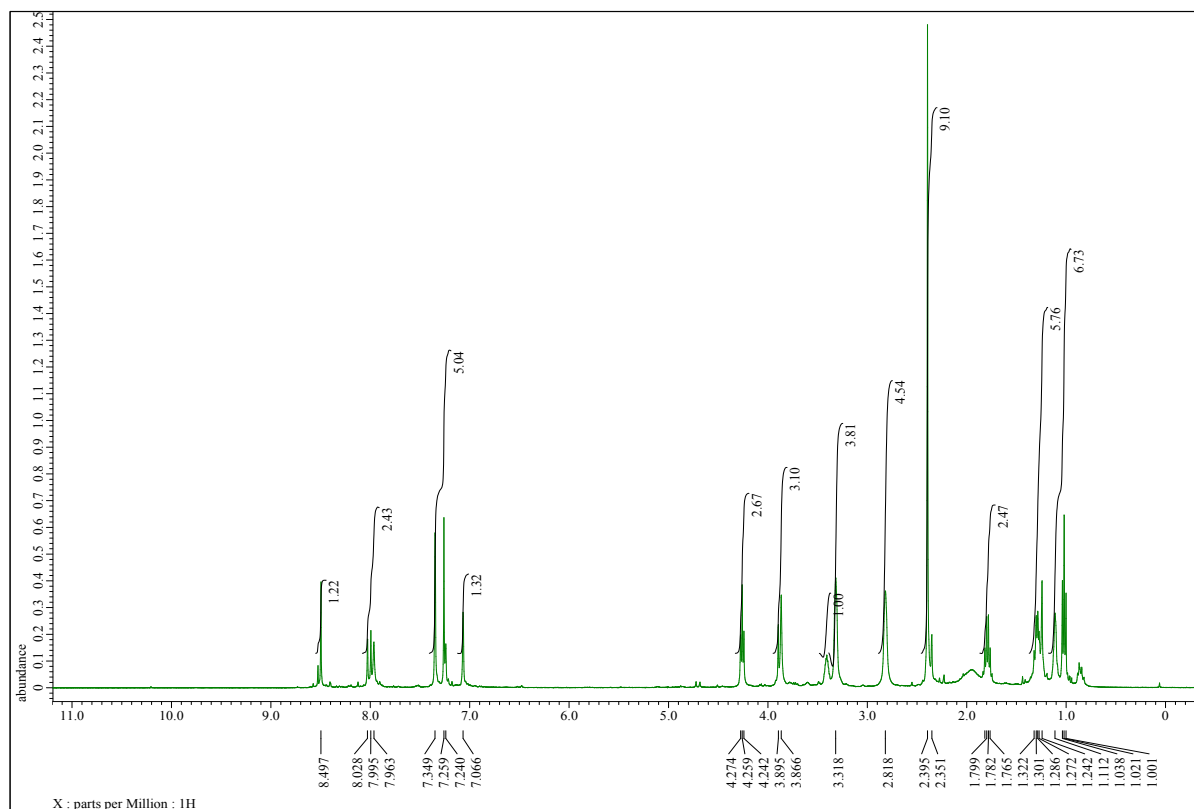

$^{13}\text{C}$ NMR (100MHz,  $\text{CDCl}_3$ ) (4u):

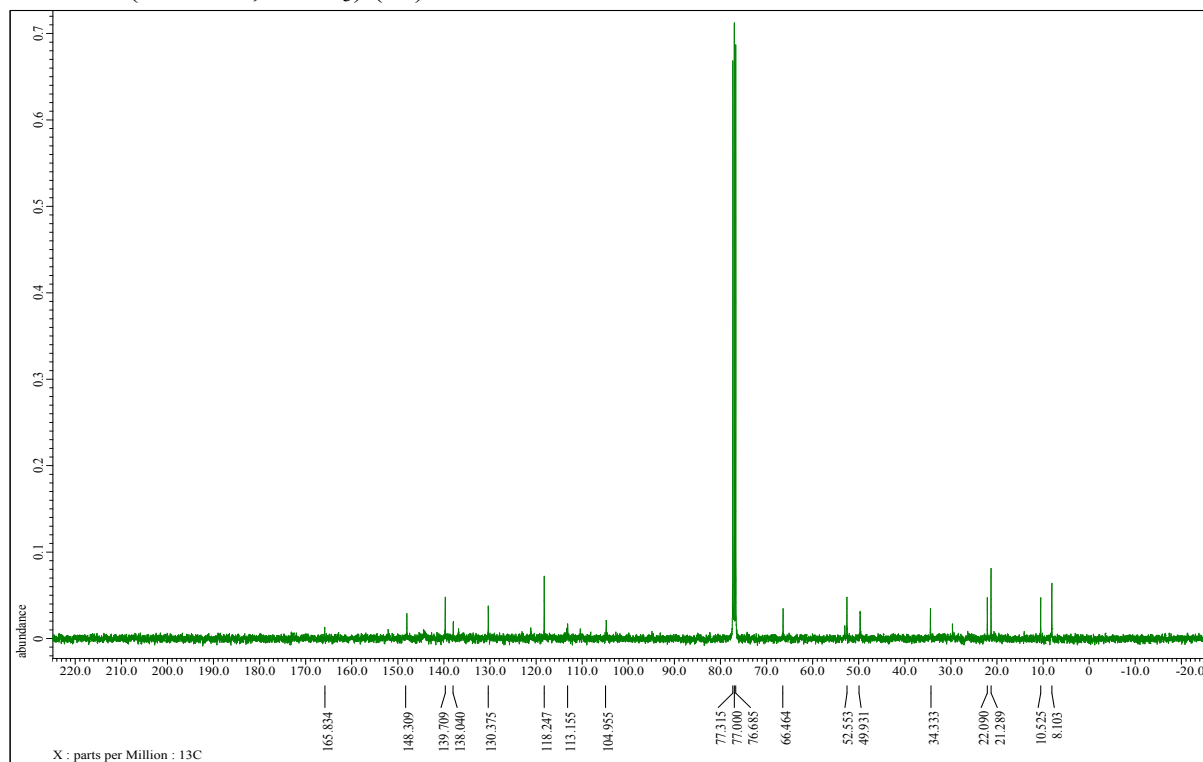

## Qualitative Compound Report

**Data File** RK-227.d  
**Sample Type** Sample  
**Instrument Name** Instrument 1  
**Acq Method** Demo JK.m  
**IRM Calibration Status** Success  
**Comment**

**Sample Group**  
**Acquisition SW** 6200 series TOF/6500 series  
**Version** Q-TOF B.05.01 (B5125.1)

**Sample Name** RK-227

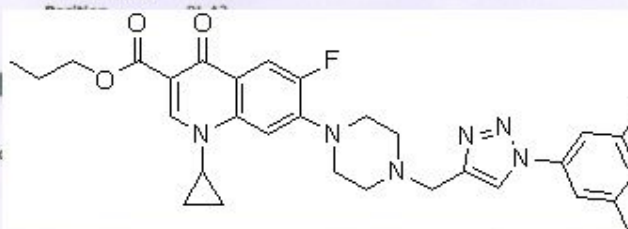

### Compound Table

| Compound Label | RT    | Mass     | MFG Formula |
|----------------|-------|----------|-------------|
| Cpd 7: 0.103   | 0.103 | 558.4915 | <none>      |

| Compound Label | m/z      | RT    | Algorithm                 | Mass     |
|----------------|----------|-------|---------------------------|----------|
| Cpd 7: 0.103   | 559.4988 | 0.103 | Find by Molecular Feature | 558.4915 |

### MFE MS Spectrum

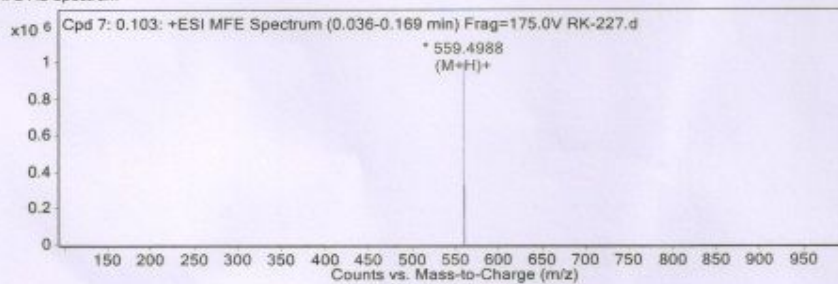

### MFE MS Zoomed Spectrum

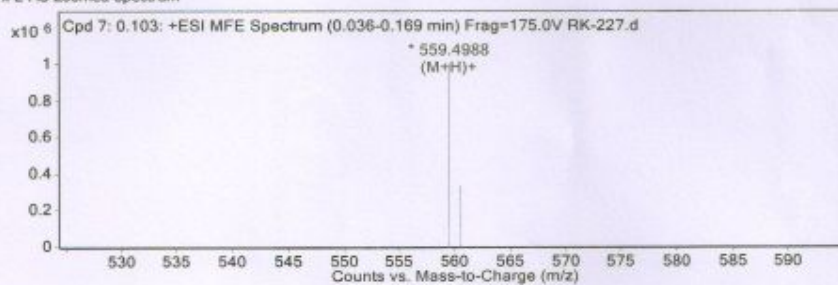

### MS Spectrum Peak List

| m/z      | z | Abund      | Ion    |
|----------|---|------------|--------|
| 559.4988 | 1 | 1001560.63 | (M+H)+ |
| 560.4992 | 1 | 327256     | (M+H)+ |

--- End Of Report ---
